# Supplementary material for: Combining plasma extracellular vesicle Let-7b-5p, miR-184 and circulating miR-22-3p levels for NSCLC diagnosis and drug resistance prediction
Source: PubMed Central journal article supplement (PMC9035169; doi:10.1038/s41598-022-10598-x), 2022-04-23

# Combining Plasma Extracellular Vesicle Let-7b-5p, miR-184 and Circulating miR-22-3p Levels for NSCLC Diagnosis and Drug Resistance Prediction

G. P. Vadla<sup>1</sup>, B. Daghat<sup>1</sup>, N. Patterson<sup>1</sup>, V. Ahmad<sup>1</sup>, G. Perez<sup>1\*</sup>, A. Garcia<sup>1\*</sup>, Y. Manjunath<sup>2</sup>, J.T. Kaifi<sup>2,3</sup>, G. Li<sup>2</sup>, and C.Y. Chabu<sup>1,2,3\*</sup>

## Supplementary information 1. Bioinformatics pipeline for survival analysis

```
#code adapted from: #https://www.jianshu.com/p/5e4285289137 #https://bioc.ism.ac.jp/packages/3.2/
bioc/vignettes/TCGABiolinks/inst/doc/tcgaBiolinks.html #https://www.rdocumentation.org/packages/
survminer/versions/0.1.1/topics/ggsurvplot
```

```
#hsa-mir-184
```

```
samplesTP <- TCGAquery_SampleTypes(barcode = colnames(miR_matrix), typesample = c("TP"))
mir184_exp <- miR_matrix[c("hsa-mir-184"), samplesTP]
names(mir184_exp) <- sapply(strsplit(names(mir184_exp), '-'), function(x) paste(x[1:3], collapse="-"))
clinical$GENE <- mir184_exp[clinical$submitter_id]
```

```
df1 <- subset(clinical, select=c(submitter_id, vital_status, days_to_death, days_to_last_follow_up, GENE))
df1$years_death <- df1$days_to_death/365 #convert days to years
df1$years_to_last_follow_up <- df1$days_to_last_follow_up/365
df1$os <- ifelse(df1$vital_status == 'Alive', df1$years_to_last_follow_up, df1$years_death) #alive sample uses
df1 <- df1[!is.na(df1$GENE),] #Remove samples with 0 expression
df1[df1$vital_status == 'Dead',]$vital_status <- 2
df1[df1$vital_status == 'Alive',]$vital_status <- 1
df1$vital_status <- as.numeric(df1$vital_status)
```

```
#Determine the optimal cutpoint of variables
```

```
df1.cut <- surv_cutpoint(df1,
  time = "os",
  event = "vital_status",
  variables = c("GENE"))
```

```
summary(df1.cut)
```

```
##      cutpoint statistic
## GENE 13.91485  2.567961
```

```
#Categorize variables
```

```
df1.cat <- surv_categorize(df1.cut, variables = NULL, labels = c("low", "high"))
head(df1.cat)
```

```
##      os vital_status GENE
## 1 2.5945205         1 low
## 2 2.9616438         2 low
## 3 0.7342466         2 low
## 4 0.8410959         2 low
## 5 0.0000000         2 low
## 6 1.4931507         1 low
```

df1.cat

| ##    | os         | vital_status | GENE |
|-------|------------|--------------|------|
| ## 1  | 2.59452055 | 1            | low  |
| ## 2  | 2.96164384 | 2            | low  |
| ## 3  | 0.73424658 | 2            | low  |
| ## 4  | 0.84109589 | 2            | low  |
| ## 5  | 0.00000000 | 2            | low  |
| ## 6  | 1.49315068 | 1            | low  |
| ## 7  | 1.47123288 | 1            | low  |
| ## 8  | 0.06027397 | 2            | low  |
| ## 9  | 8.14520548 | 1            | low  |
| ## 10 | NA         | 2            | low  |
| ## 11 | 0.63013699 | 1            | low  |
| ## 12 | 3.41369863 | 1            | low  |
| ## 13 | 5.77808219 | 1            | low  |
| ## 14 | 1.40547945 | 1            | low  |
| ## 15 | 2.56986301 | 1            | low  |
| ## 16 | 2.00000000 | 1            | low  |
| ## 17 | 5.10684932 | 1            | high |
| ## 18 | 0.38082192 | 1            | low  |
| ## 19 | 0.78630137 | 1            | low  |
| ## 20 | 4.19452055 | 2            | low  |
| ## 21 | 1.66301370 | 2            | high |
| ## 22 | 1.63835616 | 2            | low  |
| ## 23 | 2.21369863 | 2            | low  |
| ## 24 | 0.61643836 | 1            | low  |
| ## 25 | 3.14520548 | 1            | low  |
| ## 26 | 5.92054795 | 1            | low  |
| ## 27 | 0.76986301 | 2            | low  |
| ## 28 | 4.44109589 | 1            | low  |
| ## 29 | 1.62465753 | 2            | low  |
| ## 30 | 2.16712329 | 1            | low  |
| ## 31 | 1.24657534 | 1            | low  |
| ## 32 | 1.79726027 | 2            | low  |
| ## 33 | 7.33150685 | 1            | low  |
| ## 34 | 0.96712329 | 1            | low  |
| ## 35 | 0.38630137 | 1            | low  |
| ## 36 | 1.96986301 | 2            | low  |
| ## 37 | 4.79452055 | 1            | low  |
| ## 38 | 1.66301370 | 1            | low  |
| ## 39 | 3.00547945 | 1            | low  |
| ## 40 | 1.33424658 | 1            | low  |
| ## 41 | 0.36712329 | 1            | low  |
| ## 42 | 2.43287671 | 1            | low  |
| ## 43 | 0.01095890 | 2            | low  |
| ## 44 | 7.09589041 | 1            | low  |
| ## 45 | 4.92602740 | 2            | low  |
| ## 46 | 0.13150685 | 1            | low  |
| ## 47 | 1.19178082 | 1            | high |
| ## 48 | 2.38082192 | 2            | low  |
| ## 49 | 4.87123288 | 2            | low  |
| ## 50 | 3.95068493 | 1            | low  |
| ## 51 | 3.39452055 | 1            | low  |

|        |             |   |      |
|--------|-------------|---|------|
| ## 52  | 1.80000000  | 1 | low  |
| ## 53  | 10.79452055 | 1 | low  |
| ## 54  | 2.45479452  | 1 | low  |
| ## 55  | 5.18630137  | 1 | low  |
| ## 56  | 1.12054795  | 1 | low  |
| ## 57  | 0.70410959  | 2 | low  |
| ## 58  | 1.22739726  | 1 | low  |
| ## 59  | 0.96164384  | 1 | low  |
| ## 60  | 2.08219178  | 2 | low  |
| ## 61  | 0.84383562  | 2 | low  |
| ## 62  | 0.16986301  | 1 | low  |
| ## 63  | 7.10958904  | 1 | low  |
| ## 64  | 4.11232877  | 2 | low  |
| ## 65  | 2.37260274  | 1 | low  |
| ## 66  | 1.19178082  | 1 | low  |
| ## 67  | 6.46575342  | 1 | low  |
| ## 68  | 1.69041096  | 1 | low  |
| ## 69  | 2.03013699  | 1 | low  |
| ## 70  | 1.89041096  | 1 | low  |
| ## 71  | 2.43561644  | 1 | low  |
| ## 72  | 1.61917808  | 1 | low  |
| ## 73  | 1.22739726  | 1 | low  |
| ## 74  | 4.03835616  | 1 | low  |
| ## 75  | 1.78356164  | 1 | low  |
| ## 77  | 0.04109589  | 1 | low  |
| ## 78  | 0.96986301  | 2 | low  |
| ## 79  | 3.16986301  | 1 | low  |
| ## 80  | 2.54794521  | 1 | low  |
| ## 81  | 1.28219178  | 2 | low  |
| ## 82  | 3.10958904  | 2 | low  |
| ## 83  | 0.09041096  | 2 | low  |
| ## 84  | 1.30958904  | 2 | low  |
| ## 85  | 3.98356164  | 2 | low  |
| ## 86  | 1.99452055  | 1 | low  |
| ## 87  | 1.13424658  | 2 | low  |
| ## 88  | 0.57534247  | 2 | low  |
| ## 89  | 0.15890411  | 2 | low  |
| ## 90  | 2.33424658  | 1 | high |
| ## 91  | 2.72054795  | 1 | low  |
| ## 92  | 1.17534247  | 2 | low  |
| ## 93  | 2.70684932  | 1 | low  |
| ## 94  | 1.78356164  | 1 | low  |
| ## 95  | 5.85479452  | 1 | low  |
| ## 96  | 3.27945205  | 2 | low  |
| ## 97  | 1.30684932  | 1 | low  |
| ## 98  | 0.50410959  | 1 | low  |
| ## 99  | 0.92054795  | 2 | low  |
| ## 100 | 1.25205479  | 1 | low  |
| ## 101 | 8.38082192  | 1 | low  |
| ## 102 | 1.85479452  | 2 | low  |
| ## 103 | 1.13424658  | 1 | low  |
| ## 104 | 1.58356164  | 1 | high |
| ## 105 | 2.67397260  | 2 | low  |
| ## 106 | 2.54520548  | 2 | low  |

|        |            |   |      |
|--------|------------|---|------|
| ## 107 | 0.44109589 | 2 | low  |
| ## 108 | 1.28493151 | 2 | low  |
| ## 109 | 1.03013699 | 2 | low  |
| ## 110 | 2.02739726 | 1 | low  |
| ## 111 | 1.83561644 | 1 | low  |
| ## 112 | 2.50136986 | 1 | high |
| ## 113 | 0.45205479 | 1 | low  |
| ## 114 | 1.37808219 | 2 | low  |
| ## 115 | 1.56986301 | 1 | high |
| ## 116 | 0.51232877 | 2 | low  |
| ## 117 | 2.72602740 | 2 | low  |
| ## 118 | 1.58356164 | 1 | low  |
| ## 119 | 2.73150685 | 1 | low  |
| ## 120 | 2.26301370 | 2 | low  |
| ## 121 | 1.47671233 | 1 | high |
| ## 122 | 1.13698630 | 1 | high |
| ## 123 | 2.36712329 | 2 | low  |
| ## 124 | 1.98082192 | 1 | low  |
| ## 125 | 0.92876712 | 2 | low  |
| ## 126 | 2.20547945 | 1 | high |
| ## 127 | 0.49041096 | 2 | low  |
| ## 128 | 1.49863014 | 1 | low  |
| ## 129 | 1.16712329 | 1 | low  |
| ## 130 | 4.15342466 | 2 | high |
| ## 131 | 0.23835616 | 2 | low  |
| ## 132 | 1.01369863 | 2 | low  |
| ## 133 | 0.31780822 | 2 | low  |
| ## 134 | 3.91506849 | 1 | low  |
| ## 135 | 2.95616438 | 1 | high |
| ## 136 | 2.93424658 | 1 | low  |
| ## 137 | 1.25205479 | 2 | low  |
| ## 138 | 1.65753425 | 1 | low  |
| ## 139 | 1.90136986 | 2 | low  |
| ## 140 | 1.55616438 | 1 | low  |
| ## 141 | 2.26575342 | 1 | low  |
| ## 142 | 0.05205479 | 2 | low  |
| ## 143 | 0.00000000 | 1 | low  |
| ## 144 | 7.75890411 | 1 | low  |
| ## 145 | 2.34246575 | 2 | low  |
| ## 146 | 2.72602740 | 2 | low  |
| ## 147 | 1.55616438 | 1 | low  |
| ## 148 | 0.50958904 | 1 | low  |
| ## 149 | 2.36438356 | 1 | low  |
| ## 150 | 3.18630137 | 1 | low  |
| ## 151 | 1.78904110 | 1 | low  |
| ## 152 | 1.92054795 | 1 | high |
| ## 153 | 3.57534247 | 1 | low  |
| ## 154 | 3.54246575 | 2 | low  |
| ## 155 | NA         | 1 | low  |
| ## 156 | 2.47671233 | 1 | low  |
| ## 157 | 3.08493151 | 1 | low  |
| ## 158 | 0.49041096 | 1 | low  |
| ## 159 | 0.66849315 | 2 | low  |
| ## 160 | 1.96712329 | 1 | low  |

|        |             |   |      |
|--------|-------------|---|------|
| ## 161 | 1.51232877  | 1 | low  |
| ## 162 | 1.78630137  | 1 | low  |
| ## 163 | 0.06575342  | 1 | low  |
| ## 164 | 8.68219178  | 2 | high |
| ## 165 | 0.32602740  | 1 | low  |
| ## 166 | 19.34794521 | 1 | low  |
| ## 167 | 5.29315068  | 1 | high |
| ## 168 | 1.67123288  | 1 | high |
| ## 169 | 4.65753425  | 1 | low  |
| ## 170 | 6.70958904  | 1 | low  |
| ## 171 | 1.64383562  | 1 | low  |
| ## 172 | 3.38356164  | 2 | low  |
| ## 173 | 3.77808219  | 2 | low  |
| ## 174 | 0.70136986  | 1 | low  |
| ## 175 | 1.16712329  | 1 | low  |
| ## 176 | 4.43013699  | 1 | low  |
| ## 177 | 1.20547945  | 1 | low  |
| ## 178 | 2.01917808  | 2 | low  |
| ## 179 | 2.25753425  | 1 | low  |
| ## 180 | 1.87123288  | 1 | low  |
| ## 181 | 1.63287671  | 1 | low  |
| ## 182 | 0.04931507  | 2 | low  |
| ## 183 | 1.26027397  | 2 | low  |
| ## 184 | 7.16986301  | 2 | low  |
| ## 185 | 0.83013699  | 2 | low  |
| ## 186 | 3.37808219  | 1 | low  |
| ## 188 | 0.09863014  | 1 | low  |
| ## 189 | 2.93698630  | 1 | low  |
| ## 190 | 1.33698630  | 2 | low  |
| ## 191 | 2.60273973  | 2 | low  |
| ## 192 | 3.08219178  | 1 | low  |
| ## 193 | 1.71506849  | 1 | high |
| ## 194 | 1.92876712  | 1 | high |
| ## 195 | 2.08493151  | 1 | low  |
| ## 196 | 1.63013699  | 1 | low  |
| ## 197 | 5.40821918  | 1 | low  |
| ## 198 | 2.40821918  | 2 | low  |
| ## 199 | 0.70684932  | 2 | low  |
| ## 200 | 0.68493151  | 2 | low  |
| ## 201 | 4.38356164  | 2 | low  |
| ## 202 | 1.67123288  | 1 | low  |
| ## 203 | 1.01917808  | 1 | low  |
| ## 204 | 1.65205479  | 1 | high |
| ## 205 | 1.22191781  | 1 | low  |
| ## 206 | 0.21643836  | 1 | low  |
| ## 207 | 1.41095890  | 1 | low  |
| ## 208 | 9.95890411  | 1 | low  |
| ## 210 | 1.82465753  | 2 | low  |
| ## 211 | 0.03013699  | 1 | low  |
| ## 212 | 1.96986301  | 1 | low  |
| ## 213 | 3.25753425  | 1 | low  |
| ## 214 | 0.51780822  | 2 | low  |
| ## 215 | 0.13698630  | 1 | low  |
| ## 216 | 0.45753425  | 2 | low  |

|        |             |   |      |
|--------|-------------|---|------|
| ## 217 | 2.31506849  | 1 | low  |
| ## 218 | 7.73424658  | 1 | low  |
| ## 220 | 2.58630137  | 1 | low  |
| ## 221 | 5.65753425  | 1 | low  |
| ## 222 | 4.10410959  | 2 | low  |
| ## 223 | 0.41369863  | 1 | low  |
| ## 224 | 1.16986301  | 1 | low  |
| ## 225 | 2.70410959  | 2 | low  |
| ## 226 | 1.47945205  | 1 | low  |
| ## 227 | 0.42191781  | 2 | low  |
| ## 228 | 1.80273973  | 1 | low  |
| ## 229 | 0.33972603  | 2 | low  |
| ## 230 | 0.84109589  | 1 | low  |
| ## 231 | 0.66849315  | 2 | high |
| ## 232 | 0.87945205  | 2 | low  |
| ## 233 | 2.60821918  | 2 | low  |
| ## 234 | 1.55616438  | 1 | low  |
| ## 235 | 2.29863014  | 1 | high |
| ## 236 | 3.75068493  | 1 | low  |
| ## 237 | 7.34520548  | 2 | low  |
| ## 238 | 1.15616438  | 1 | high |
| ## 239 | 1.36986301  | 2 | low  |
| ## 240 | 6.81643836  | 1 | low  |
| ## 241 | 18.44383562 | 1 | low  |
| ## 242 | 4.44383562  | 2 | low  |
| ## 243 | 0.26575342  | 2 | low  |
| ## 244 | 1.44109589  | 1 | low  |
| ## 245 | 3.22739726  | 1 | low  |
| ## 246 | NA          | 1 | low  |
| ## 248 | 3.31232877  | 2 | low  |
| ## 249 | 3.46575342  | 2 | high |
| ## 250 | 1.30958904  | 1 | low  |
| ## 251 | 6.48767123  | 1 | low  |
| ## 252 | 1.45479452  | 1 | low  |
| ## 253 | 1.30410959  | 1 | low  |
| ## 254 | 4.08767123  | 2 | low  |
| ## 255 | 1.27671233  | 1 | low  |
| ## 256 | 7.16712329  | 1 | low  |
| ## 257 | 1.18904110  | 2 | low  |
| ## 258 | NA          | 2 | low  |
| ## 259 | 3.33150685  | 1 | low  |
| ## 260 | 3.83561644  | 1 | high |
| ## 261 | 1.64109589  | 1 | low  |
| ## 262 | 6.55616438  | 2 | low  |
| ## 263 | 1.92876712  | 1 | high |
| ## 264 | 8.93424658  | 1 | low  |
| ## 265 | 7.38630137  | 1 | low  |
| ## 266 | 9.05479452  | 1 | high |
| ## 267 | 1.90958904  | 2 | low  |
| ## 268 | 2.84931507  | 1 | low  |
| ## 269 | 0.33150685  | 2 | low  |
| ## 270 | 2.81095890  | 2 | low  |
| ## 271 | 3.09589041  | 1 | low  |
| ## 272 | 1.21095890  | 2 | high |

|        |            |   |      |
|--------|------------|---|------|
| ## 273 | 3.20821918 | 2 | low  |
| ## 274 | 0.79726027 | 2 | low  |
| ## 275 | 3.36712329 | 2 | low  |
| ## 276 | 1.62191781 | 1 | low  |
| ## 277 | 0.23013699 | 1 | low  |
| ## 278 | 2.60000000 | 1 | low  |
| ## 279 | 1.71506849 | 2 | low  |
| ## 280 | 1.13972603 | 1 | low  |
| ## 281 | 0.50958904 | 1 | low  |
| ## 282 | 3.19726027 | 2 | high |
| ## 284 | 3.06301370 | 1 | low  |
| ## 285 | 2.16712329 | 1 | high |
| ## 286 | 0.59726027 | 1 | low  |
| ## 287 | 3.11232877 | 2 | low  |
| ## 288 | 1.80273973 | 1 | high |
| ## 289 | 2.16712329 | 1 | low  |
| ## 290 | 1.59452055 | 2 | low  |
| ## 291 | 5.06027397 | 1 | high |
| ## 292 | 0.48219178 | 2 | low  |
| ## 293 | 1.32602740 | 1 | low  |
| ## 294 | 3.47397260 | 2 | low  |
| ## 295 | 6.15890411 | 1 | low  |
| ## 296 | 2.85753425 | 2 | low  |
| ## 297 | 2.41643836 | 1 | low  |
| ## 298 | 0.93150685 | 2 | low  |
| ## 299 | 3.27123288 | 2 | low  |
| ## 300 | 0.88493151 | 1 | low  |
| ## 301 | 2.60000000 | 2 | low  |
| ## 302 | 2.47945205 | 2 | low  |
| ## 303 | 1.64657534 | 1 | high |
| ## 304 | 1.00000000 | 1 | low  |
| ## 306 | 1.42465753 | 1 | low  |
| ## 307 | 2.36164384 | 1 | low  |
| ## 308 | 4.10684932 | 2 | low  |
| ## 309 | 0.93972603 | 2 | low  |
| ## 310 | 1.72602740 | 1 | low  |
| ## 311 | 6.02465753 | 1 | low  |
| ## 312 | 1.30410959 | 1 | low  |
| ## 313 | 0.77260274 | 2 | low  |
| ## 314 | 1.11780822 | 1 | low  |
| ## 315 | 0.38082192 | 2 | low  |
| ## 316 | 1.13698630 | 1 | low  |
| ## 317 | 2.25753425 | 1 | low  |
| ## 318 | NA         | 1 | low  |
| ## 319 | 2.45479452 | 2 | low  |
| ## 320 | 2.19178082 | 2 | high |
| ## 321 | 0.71232877 | 1 | low  |
| ## 322 | 2.49863014 | 1 | low  |
| ## 323 | 3.50684932 | 1 | low  |
| ## 324 | 1.70958904 | 1 | high |
| ## 325 | 3.44657534 | 2 | low  |
| ## 326 | 0.72328767 | 1 | low  |
| ## 327 | NA         | 1 | low  |
| ## 328 | 1.31780822 | 1 | low  |

|        |             |   |      |
|--------|-------------|---|------|
| ## 329 | 1.62739726  | 2 | low  |
| ## 330 | 0.16986301  | 2 | low  |
| ## 331 | 3.48493151  | 1 | low  |
| ## 332 | 0.27123288  | 2 | low  |
| ## 333 | 2.45479452  | 2 | low  |
| ## 334 | 0.07671233  | 1 | low  |
| ## 335 | 4.18630137  | 2 | low  |
| ## 336 | 0.36438356  | 1 | low  |
| ## 337 | 2.93972603  | 2 | low  |
| ## 338 | 2.00273973  | 2 | low  |
| ## 339 | 3.17534247  | 1 | high |
| ## 340 | 2.52602740  | 2 | low  |
| ## 341 | 1.68219178  | 1 | low  |
| ## 342 | 1.98356164  | 1 | low  |
| ## 343 | 4.17260274  | 1 | low  |
| ## 344 | 1.02739726  | 2 | low  |
| ## 345 | 4.27123288  | 1 | low  |
| ## 346 | 1.41095890  | 1 | low  |
| ## 347 | 0.82191781  | 2 | low  |
| ## 348 | 1.72054795  | 2 | low  |
| ## 349 | 1.52602740  | 2 | low  |
| ## 350 | 1.65205479  | 1 | low  |
| ## 351 | 1.57260274  | 2 | low  |
| ## 352 | 3.74520548  | 1 | low  |
| ## 353 | 2.16712329  | 1 | low  |
| ## 354 | 0.66575342  | 2 | low  |
| ## 355 | 4.47123288  | 2 | low  |
| ## 356 | 2.90410959  | 1 | low  |
| ## 357 | 0.87945205  | 2 | high |
| ## 358 | 5.55342466  | 2 | low  |
| ## 359 | 1.34794521  | 1 | low  |
| ## 360 | 1.65753425  | 1 | low  |
| ## 361 | 1.20547945  | 2 | low  |
| ## 362 | 2.21095890  | 2 | low  |
| ## 363 | 1.12602740  | 1 | low  |
| ## 364 | 4.90410959  | 2 | low  |
| ## 365 | 1.93150685  | 1 | low  |
| ## 366 | 0.96986301  | 1 | low  |
| ## 367 | 5.66301370  | 1 | low  |
| ## 368 | 10.29863014 | 1 | low  |
| ## 369 | 2.20821918  | 1 | low  |
| ## 370 | 1.30410959  | 1 | low  |
| ## 371 | 2.43561644  | 1 | low  |
| ## 372 | 1.12054795  | 2 | low  |
| ## 373 | 1.85479452  | 1 | low  |
| ## 374 | 2.30684932  | 1 | low  |
| ## 375 | 9.20821918  | 2 | low  |
| ## 376 | 0.24931507  | 2 | low  |
| ## 377 | 1.18904110  | 2 | low  |
| ## 378 | 2.02465753  | 1 | low  |
| ## 379 | 1.26575342  | 1 | low  |
| ## 380 | 0.03835616  | 1 | low  |
| ## 381 | 2.11780822  | 1 | low  |
| ## 382 | 3.70136986  | 1 | high |



|        |             |   |      |
|--------|-------------|---|------|
| ## 383 | 1.92328767  | 2 | low  |
| ## 384 | 0.55342466  | 1 | low  |
| ## 385 | 1.53698630  | 2 | low  |
| ## 386 | 2.22739726  | 1 | high |
| ## 387 | 1.49589041  | 1 | low  |
| ## 388 | 1.70958904  | 2 | low  |
| ## 389 | 1.21643836  | 2 | low  |
| ## 390 | 1.89315068  | 1 | low  |
| ## 391 | 1.50958904  | 1 | low  |
| ## 392 | 2.41643836  | 1 | high |
| ## 393 | 4.61095890  | 1 | low  |
| ## 394 | 5.01369863  | 2 | low  |
| ## 395 | 1.78904110  | 2 | low  |
| ## 396 | 3.92328767  | 1 | low  |
| ## 397 | 8.47671233  | 1 | low  |
| ## 398 | 1.78630137  | 1 | low  |
| ## 399 | 2.08493151  | 2 | low  |
| ## 400 | 1.66849315  | 1 | low  |
| ## 401 | 3.89315068  | 2 | low  |
| ## 402 | 1.65205479  | 1 | low  |
| ## 403 | 1.54794521  | 1 | low  |
| ## 404 | 1.51506849  | 1 | low  |
| ## 405 | 0.78082192  | 1 | low  |
| ## 406 | 3.06575342  | 1 | low  |
| ## 407 | 3.71780822  | 2 | low  |
| ## 408 | 1.84657534  | 1 | low  |
| ## 409 | 0.47397260  | 2 | low  |
| ## 410 | 0.75068493  | 2 | low  |
| ## 411 | 2.12328767  | 1 | low  |
| ## 412 | 0.84931507  | 1 | low  |
| ## 413 | 2.36712329  | 1 | low  |
| ## 414 | 0.92328767  | 1 | low  |
| ## 415 | 0.46849315  | 2 | low  |
| ## 416 | 0.75342466  | 2 | low  |
| ## 417 | 0.61369863  | 1 | low  |
| ## 418 | 0.12054795  | 1 | low  |
| ## 419 | 1.43013699  | 1 | low  |
| ## 420 | 3.05479452  | 2 | low  |
| ## 421 | 1.55342466  | 1 | low  |
| ## 423 | 1.05479452  | 1 | low  |
| ## 424 | 6.19452055  | 1 | low  |
| ## 425 | 0.23013699  | 1 | low  |
| ## 426 | 0.20273973  | 2 | low  |
| ## 427 | 0.44931507  | 2 | low  |
| ## 428 | 0.92054795  | 2 | low  |
| ## 429 | 1.71232877  | 2 | high |
| ## 430 | 3.53150685  | 1 | high |
| ## 431 | 13.67671233 | 1 | high |
| ## 432 | 1.83287671  | 1 | low  |
| ## 433 | 1.16164384  | 1 | low  |
| ## 434 | 3.65205479  | 1 | low  |
| ## 435 | 1.66575342  | 1 | high |
| ## 436 | 1.73698630  | 1 | low  |
| ## 437 | 2.49315068  | 1 | low  |

|        |             |   |      |
|--------|-------------|---|------|
| ## 438 | 1.05479452  | 1 | low  |
| ## 439 | 1.21095890  | 1 | high |
| ## 440 | 0.03561644  | 1 | low  |
| ## 441 | 2.04657534  | 1 | high |
| ## 442 | 3.08493151  | 1 | low  |
| ## 443 | 6.89041096  | 1 | low  |
| ## 444 | 1.60547945  | 2 | high |
| ## 445 | 0.64931507  | 2 | low  |
| ## 446 | 0.12054795  | 1 | low  |
| ## 447 | 5.95616438  | 2 | low  |
| ## 448 | 1.33150685  | 1 | low  |
| ## 449 | 1.50684932  | 2 | low  |
| ## 450 | 0.35342466  | 1 | low  |
| ## 451 | 1.03287671  | 1 | low  |
| ## 452 | 1.83561644  | 1 | low  |
| ## 453 | 4.73424658  | 1 | low  |
| ## 454 | NA          | 2 | low  |
| ## 455 | 1.15890411  | 1 | high |
| ## 456 | 3.32876712  | 2 | low  |
| ## 457 | 1.88767123  | 1 | low  |
| ## 458 | 1.69041096  | 1 | low  |
| ## 459 | 1.58356164  | 1 | high |
| ## 460 | 1.46301370  | 1 | low  |
| ## 461 | 13.59178082 | 2 | low  |
| ## 462 | 1.94794521  | 2 | low  |
| ## 463 | 1.05479452  | 2 | low  |
| ## 464 | 0.52876712  | 2 | low  |
| ## 465 | 10.06575342 | 1 | high |
| ## 466 | 3.25753425  | 1 | low  |
| ## 467 | 0.16438356  | 1 | low  |
| ## 468 | 1.81917808  | 1 | low  |
| ## 469 | 1.19178082  | 1 | low  |
| ## 470 | 4.52876712  | 2 | low  |
| ## 471 | 5.12328767  | 1 | low  |
| ## 472 | 4.05205479  | 1 | low  |
| ## 473 | 7.17808219  | 2 | low  |
| ## 474 | 3.21917808  | 1 | low  |
| ## 475 | 5.38356164  | 1 | low  |
| ## 476 | 3.92054795  | 1 | low  |
| ## 477 | 0.09589041  | 1 | low  |
| ## 478 | 1.17260274  | 2 | low  |
| ## 479 | 13.05479452 | 1 | low  |
| ## 480 | 0.71232877  | 2 | low  |
| ## 481 | 19.85753425 | 1 | low  |
| ## 482 | 2.08493151  | 1 | low  |
| ## 483 | 1.93150685  | 1 | high |
| ## 484 | 2.67671233  | 1 | low  |
| ## 485 | 2.27123288  | 1 | low  |
| ## 486 | 3.52876712  | 2 | low  |
| ## 487 | 2.12876712  | 2 | low  |
| ## 488 | 1.28219178  | 2 | low  |
| ## 490 | 1.38356164  | 1 | high |
| ## 491 | 2.83835616  | 1 | low  |
| ## 492 | 3.62739726  | 1 | low  |

```

## 493 3.52054795      1 low
## 494 1.92054795      2 low
## 495 1.14520548      1 low
## 496 2.77534247      1 high
## 497      NA          2 low
## 498 6.09315068      1 low
## 499 1.46849315      1 low
## 500 1.36712329      1 low
## 501 6.35068493      2 low
## 502 2.38904110      1 low
## 503 1.72328767      1 low
## 504 1.21643836      2 low
## 505 0.47671233      1 low
## 506 0.49863014      1 low
## 507 4.72602740      2 low
## 508 1.27123288      2 low
## 509 0.00000000      1 low
## 510 2.27397260      1 low
## 511 3.14246575      2 low
## 512 0.32602740      2 low
## 513 1.67123288      1 low
## 514 2.73698630      2 low
## 515 1.71506849      1 low
## 516 2.86575342      2 low
## 517 1.54520548      1 low
## 518 1.14246575      1 low
## 519 0.00000000      1 low
## 520      NA          1 high
## 521 3.56438356      1 low
## 522 1.48219178      1 low

```

```

#Determine the level of miRNA expression
fit <- survfit(Surv(os, vital_status)~GENE, data=df1.cat) #Modeling based on expression
ggsurvplot(fit,data = df1.cat,title = "hsa-mir-184", size = 1 ,xlim = c(0, 5) ,ylim=c(1,100), risk.t
  font.subtitle = c(20, "bold.plain", "black"),
  font.caption = c(25, "plain", "black"),
  font.x = c(25, "plain", "black"),
  font.y = c(25, "plain", "black"),
  font.tickslab = c(24, "plain", "black"), fun = "pct", break.x.by =1)

```

```

## Warning: Vectorized input to 'element_text()' is not officially supported.
## Results may be unexpected or may change in future versions of ggplot2.

```

# hsa-mir-184

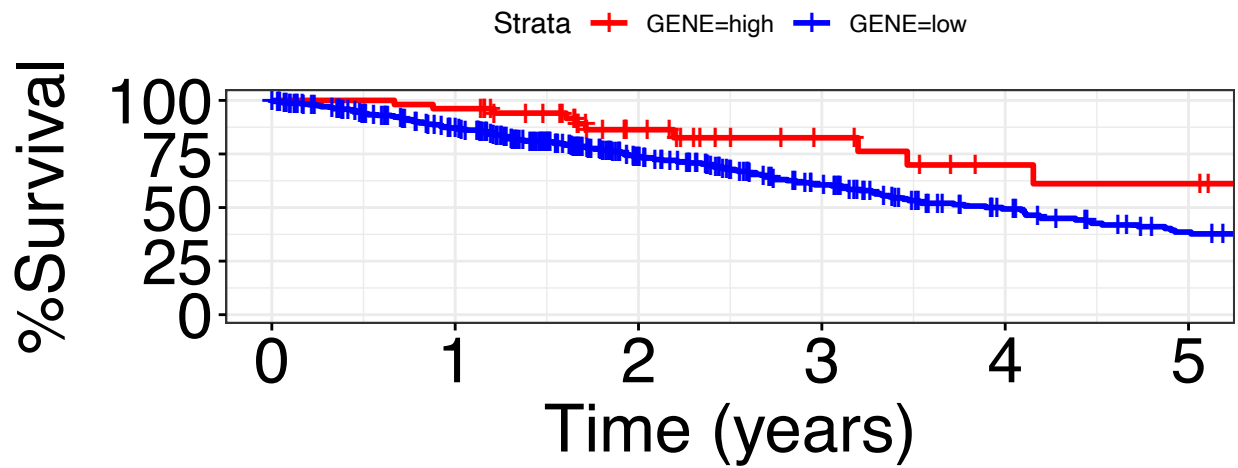

Number at risk

|        |           | 0   | 1   | 2   | 3   | 4  | 5  |
|--------|-----------|-----|-----|-----|-----|----|----|
| Strata | GENE=high | 52  | 50  | 25  | 14  | 8  | 7  |
|        | GENE=low  | 452 | 347 | 196 | 120 | 70 | 46 |

```
ggsurvplot(fit,data = df1.cat,title = "hsa-mir-184", size = 1,xlim = c(0, 5),ylim=c(1,100),xlab = "T
font.subtitle = c(20, "bold.plain", "black"),
font.caption = c(25, "plain", "black"),
font.x = c(25, "plain", "black"),
font.y = c(25, "plain", "black"),
font.tickslab = c(24, "plain", "black"), fun = "pct", break.x.by =1)
```

# hsa-mir-184

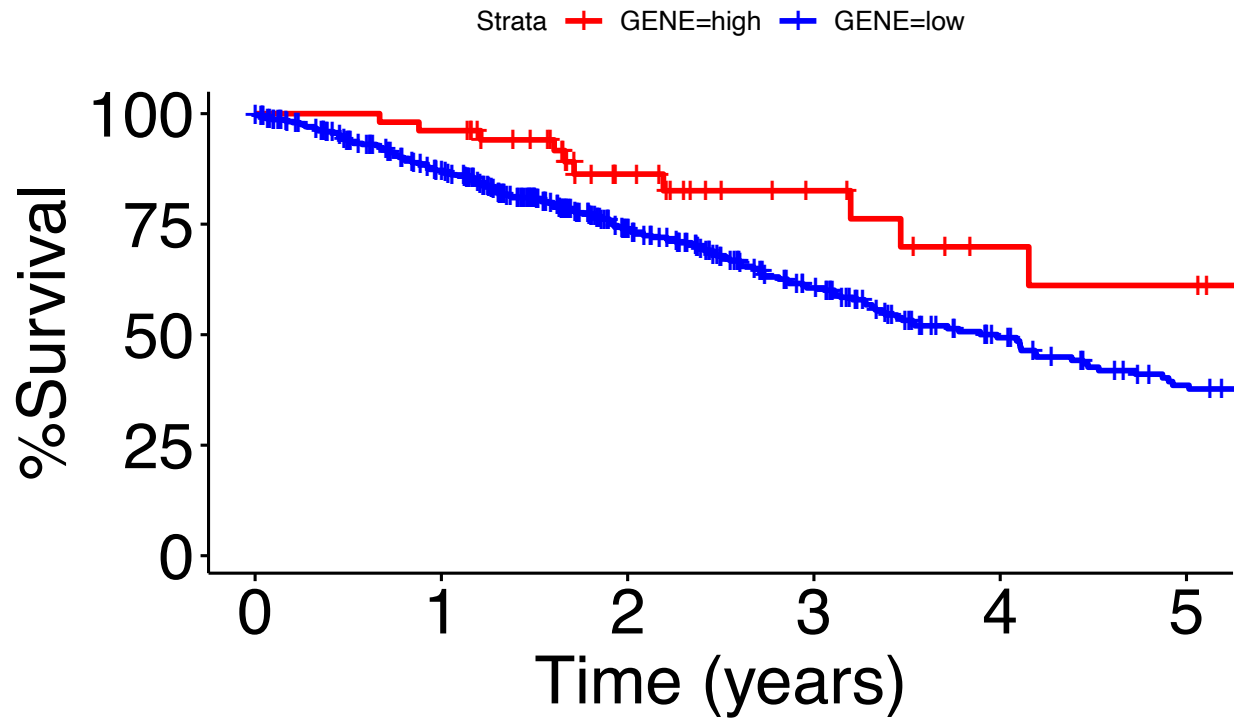

```
ggsurvplot(fit,data = df1.cat,title = "hsa-mir-184", size = 1, xlim = c(0, 10) ,ylim=c(1,100), end.  
font.subtitle = c(20, "bold,plain", "black"),  
font.caption = c(25, "plain", "black"),  
font.x = c(25, "plain", "black"),  
font.y = c(25, "plain", "black"),  
font.tickslab = c(24, "plain", "black"), fun = "pct", break.x.by =1)
```

```
## Warning: Vectorized input to 'element_text()' is not officially supported.  
## Results may be unexpected or may change in future versions of ggplot2.
```

# hsa-mir-184

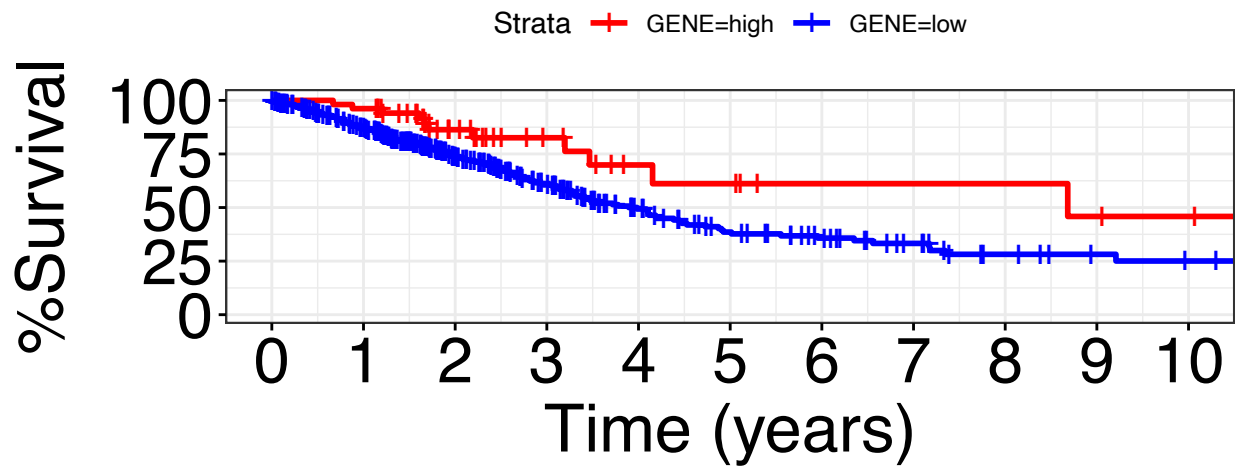

Number at risk

|        |           |     |     |     |     |    |    |    |    |    |   |    |
|--------|-----------|-----|-----|-----|-----|----|----|----|----|----|---|----|
| Strata | GENE=high | 52  | 50  | 25  | 14  | 8  | 7  | 4  | 4  | 4  | 3 | 2  |
|        | GENE=low  | 452 | 347 | 196 | 120 | 70 | 46 | 34 | 23 | 13 | 9 | 7  |
|        |           | 0   | 1   | 2   | 3   | 4  | 5  | 6  | 7  | 8  | 9 | 10 |

Time (years)

```
ggsurvplot(fit,data = df1.cat,title = "hsa-mir-184", size = 1,xlim = c(0, 10), ylim = c(0, 100),xlab = "Time (years)",
font.subtitle = c(20, "bold.plain", "black"),
font.caption = c(25, "plain", "black"),
font.x = c(25, "plain", "black"),
font.y = c(25, "plain", "black"),
font.tickslab = c(24, "plain", "black"), fun = "pct", break.x.by = 1)
```

# hsa-mir-184

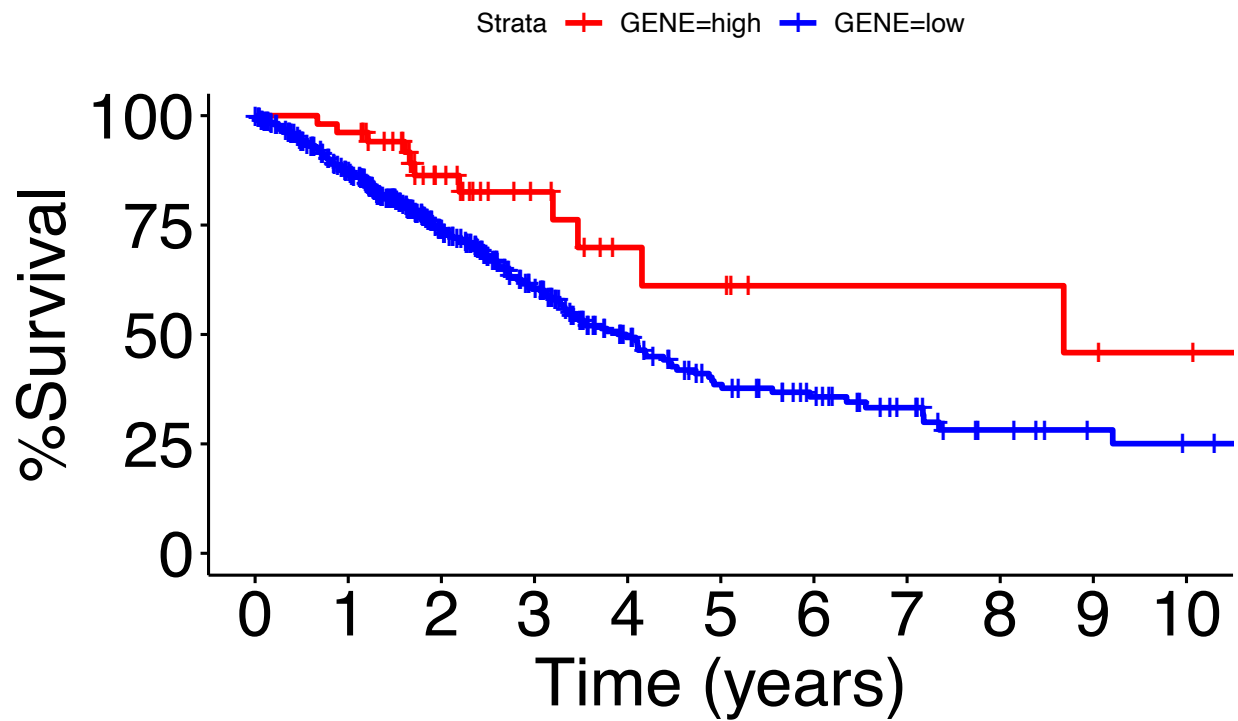

```
#Cox_Regression  
fit.coxph1<- coxph(Surv(os, vital_status) ~ GENE, data=df1.cat)  
ggforest(fit.coxph1,data = df1.cat)
```

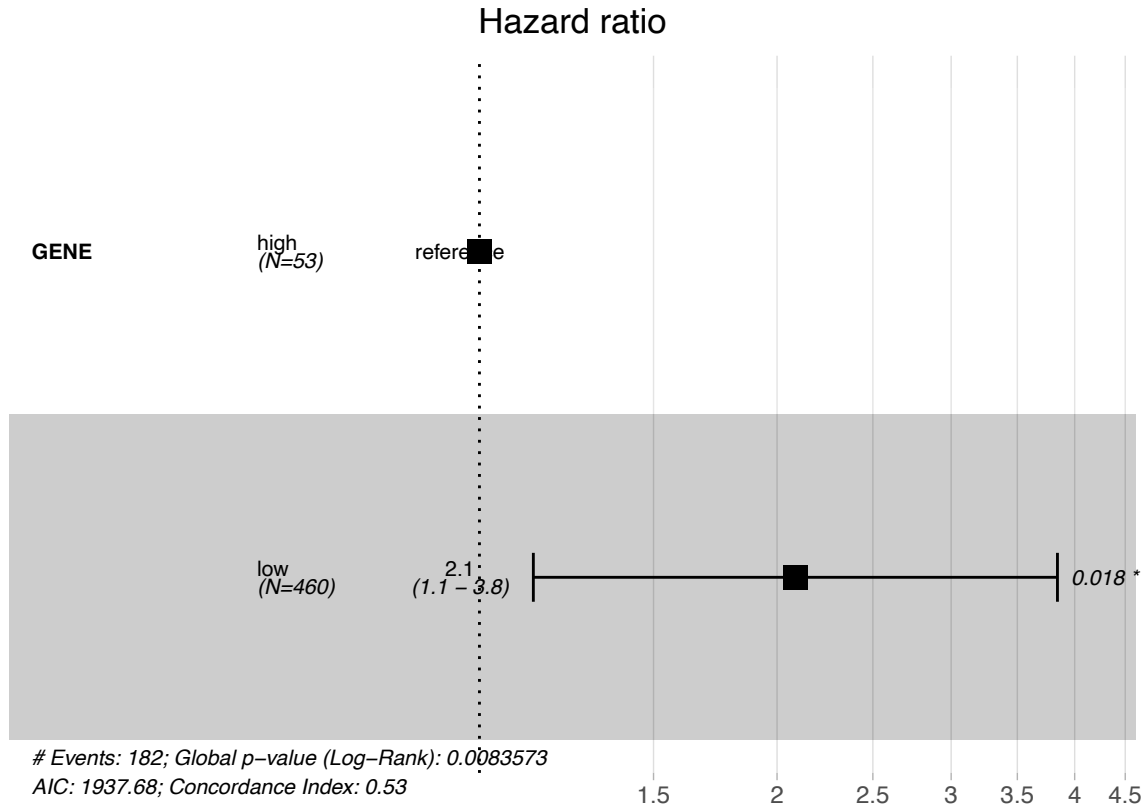

```
print(fit)
```

```
## Call: survfit(formula = Surv(os, vital_status) ~ GENE, data = df1.cat)
##
## 9 observations deleted due to missingness
##      n events median 0.95LCL 0.95UCL
## GENE=high  52     11   8.68   4.15    NA
## GENE=low  452    171   3.98   3.33   4.53
```

```
print(fit.coxph1)
```

```
## Call:
## coxph(formula = Surv(os, vital_status) ~ GENE, data = df1.cat)
##
##      coef exp(coef) se(coef)      z      p
## GENElow 0.7359    2.0873  0.3114  2.363 0.0181
##
## Likelihood ratio test=6.96 on 1 df, p=0.008357
## n= 504, number of events= 182
## (9 observations deleted due to missingness)
```

```
coxph(Surv(os, vital_status)~ GENE, data=df1.cat) %>%
gtsummary::tbl_regression(exp = TRUE)
```



```
## Table printed with 'knitr::kable()', not {gt}. Learn why at
## http://www.danielsjoberg.com/gtsummary/articles/rmarkdown.html
## To suppress this message, include 'message = FALSE' in code chunk header.
```

| Characteristic | HR   | 95% CI     | p-value |
|----------------|------|------------|---------|
| GENE           |      |            |         |
| high           |      |            |         |
| low            | 2.09 | 1.13, 3.84 | 0.018   |

```
summary(fit)$table
```

```
##           records n.max n.start events      *rmean *se(rmean)  median 0.95LCL
## GENE=high      52    52     52     11 11.483411   2.204069 8.682192 4.153425
## GENE=low      452   452    452    171  7.023464   0.694736 3.983562 3.328767
##           0.95UCL
## GENE=high      NA
## GENE=low      4.528767
```

```
#hsa-mir-22
```

```
#Get mirna data
```

```
#Screen the tumor sample barcode from the results: TP (primary solid tumor)
```

```
samplesTP <- TCGAquery_SampleTypes(barcode = colnames(miR_matrix), typesample = c("TP"))
mir22_exp <- miR_matrix[c("hsa-mir-22"), samplesTP]
names(mir22_exp) <- sapply(strsplit(names(mir22_exp), '-'), function(x) paste(x[1:3], collapse="-"))
clinical$GENE <- mir22_exp[clinical$submitter_id]
```

```
#Integrate vital status, deaths , last follow up visit.
```

```
df2 <- subset(clinical, select=c(submitter_id, vital_status, days_to_death, days_to_last_follow_up, GENE))
df2$years_death <- df2$days_to_death/365 #convert days to years
df2$years_to_last_follow_up <- df2$days_to_last_follow_up/365
df2$os <- ifelse(df2$vital_status == 'Alive', df2$years_to_last_follow_up, df2$years_death) #calculate it as d
df2 <- df2[!is.na(df2$GENE),] #Remove samples with 0 expression
df2[df2$vital_status == 'Dead',]$vital_status <- 2
df2[df2$vital_status == 'Alive',]$vital_status <- 1
df2$vital_status <- as.numeric(df2$vital_status)
```

```
#Determine the optimal cutpoint of variables
```

```
df2.cut <- surv_cutpoint(df2,
  time = "os",
  event = "vital_status",
  variables = c("GENE"))
summary(df2.cut)
```

```
##           cutpoint statistic
## GENE 81157.96  1.112411
```

```
#Categorize variables
df2.cat<-surv_categorize(df2.cut,variables = NULL, labels = c("low", "high"))
head(df2.cat)
```

```
##          os vital_status GENE
## 1 2.5945205           1 low
## 2 2.9616438           2 high
## 3 0.7342466           2 low
## 4 0.8410959           2 low
## 5 0.0000000           2 low
## 6 1.4931507           1 high
```

```
#get/plot the level of miRNA expression
fit2 <- survfit(Surv(os, vital_status)~GENE, data=df2.cat) #Modeling based on expression.
```

```
#plotKM
```

```
ggsurvplot(fit2,data = df2.cat,title = "hsa-mir-22", size = 1, xlim = c(0, 5),ylim=c(1,100), risk.table
  font.subtitle = c(20, "bold.plain", "black"),
  font.caption = c(25, "plain", "black"),
  font.x = c(25, "plain", "black"),
  font.y = c(25, "plain", "black"),
  font.tickslab = c(24, "plain", "black"), fun = "pct", break.x.by =1)
```

```
## Warning: Vectorized input to 'element_text()' is not officially supported.
## Results may be unexpected or may change in future versions of ggplot2.
```

# hsa-mir-22

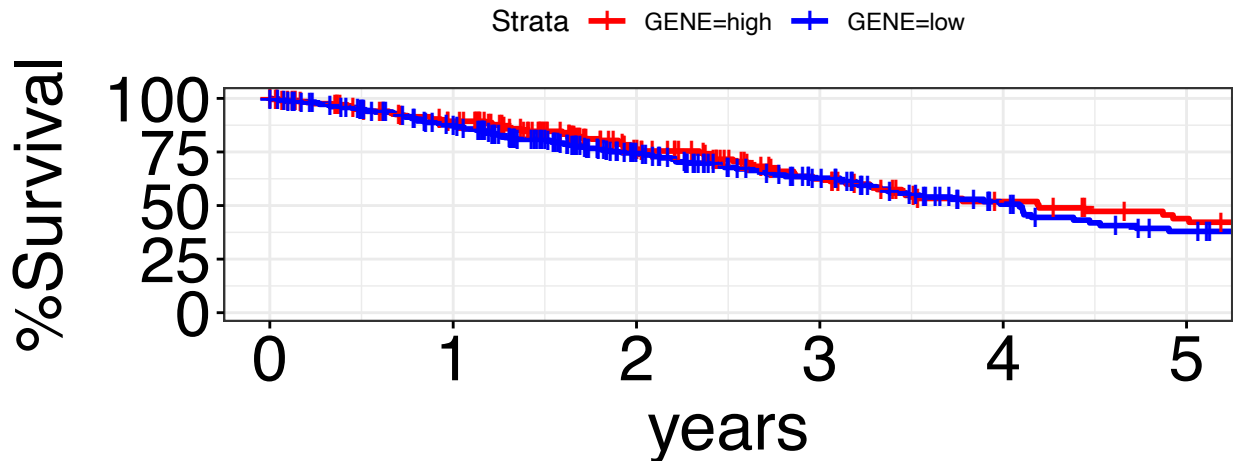

Number at risk

| Strata    | 0   | 1   | 2   | 3  | 4  | 5  |
|-----------|-----|-----|-----|----|----|----|
| GENE=high | 211 | 168 | 90  | 53 | 35 | 26 |
| GENE=low  | 293 | 229 | 131 | 81 | 43 | 27 |

```
ggsurvplot(fit2,data = df2.cat,title = "hsa-mir-22", size = 1, xlim = c(0, 5),ylim=c(1,100),xlab = "years",
font.subtitle = c(20, "bold.italic", "black"),
font.caption = c(25, "plain", "black"),
font.x = c(25, "plain", "black"),
font.y = c(25, "plain", "black"),
font.tickslab = c(24, "plain", "black"), fun = "pct", break.x.by =1)
```

# hsa-mir-22

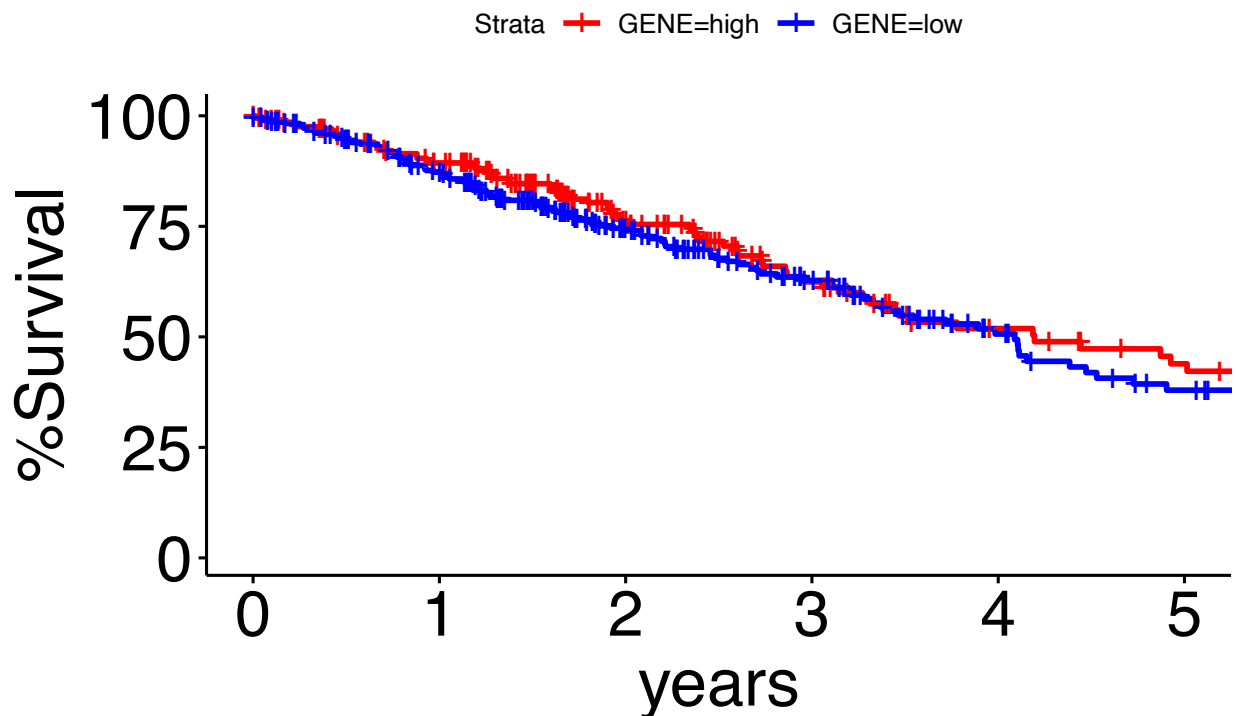

```
ggsurvplot(fit2,data = df2.cat,title = "hsa-mir-22", size = 1, xlim = c(0, 10),ylim=c(1,100), risk.table = TRUE,
font.subtitle = c(20, "bold.plain", "black"),
font.caption = c(25, "plain", "black"),
font.x = c(25, "plain", "black"),
font.y = c(25, "italic", "black"),
font.tickslab = c(24, "plain", "black"), fun = "pct", break.x.by =1)
```

```
## Warning: Vectorized input to 'element_text()' is not officially supported.
## Results may be unexpected or may change in future versions of ggplot2.
```

Survival probability (%)

# hsa-mir-22

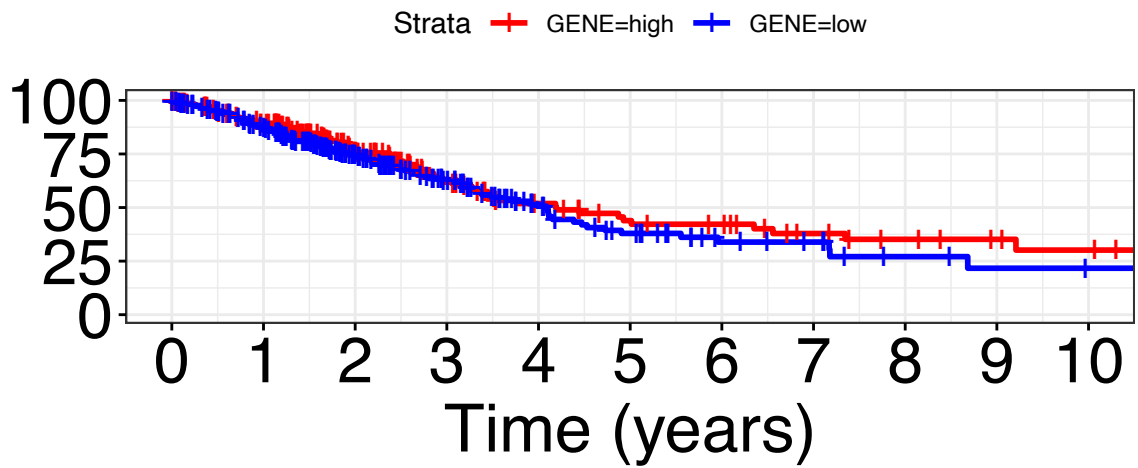

Number at risk

| Strata    | 0   | 1   | 2   | 3  | 4  | 5  | 6  | 7  | 8  | 9 | 10 |
|-----------|-----|-----|-----|----|----|----|----|----|----|---|----|
| GENE=high | 211 | 168 | 90  | 53 | 35 | 26 | 23 | 15 | 11 | 8 | 6  |
| GENE=low  | 293 | 229 | 131 | 81 | 43 | 27 | 15 | 12 | 6  | 4 | 3  |

```
ggsurvplot(fit2,data = df2.cat,title = "hsa-mir-22", size = 1, xlim = c(0, 10),ylim=c(1,100),pval=TRUE,
font.subtitle = c(20, "bold.plain", "black"),
font.caption = c(25, "plain", "black"),
font.x = c(25, "plain", "black"),
font.y = c(25, "plain", "black"),
font.tickslab = c(24, "plain", "black"), fun = "pct", break.x.by =1)
```

## Warning: Removed 1 rows containing missing values (geom\_text).

## Warning: Removed 1 rows containing missing values (geom\_text).

# hsa-mir-22

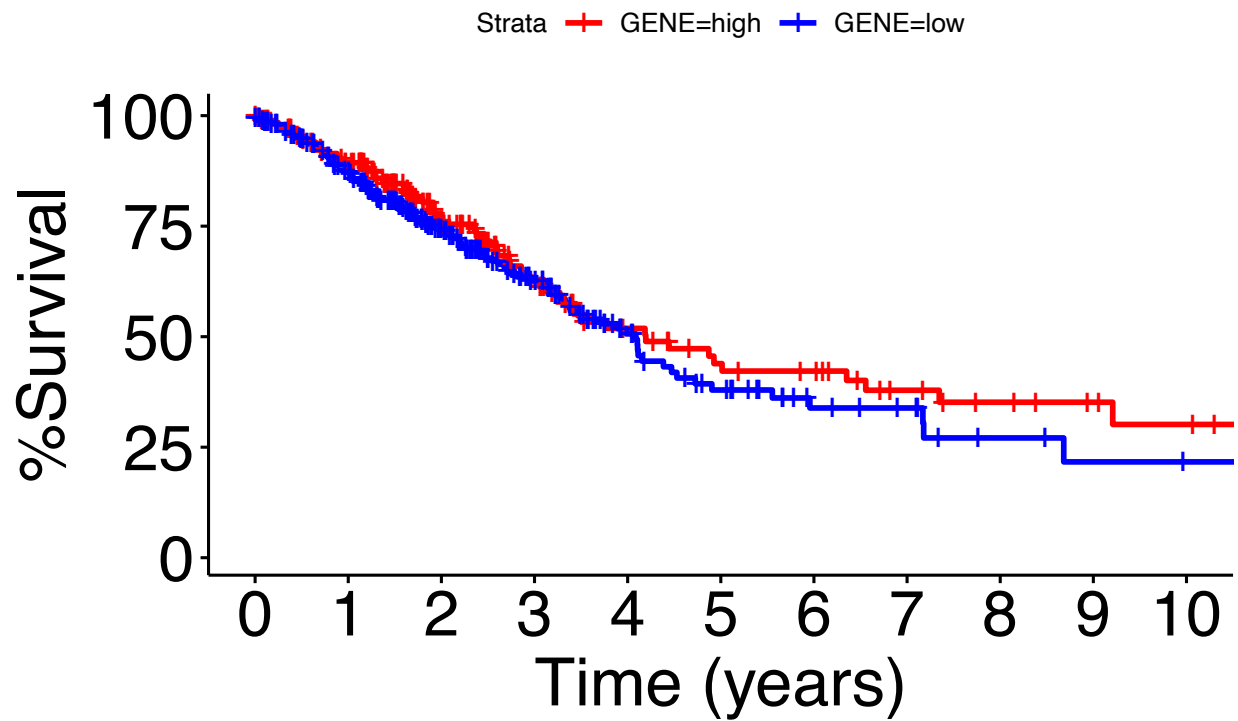

```
#Cox_Regression  
fit.coxph2<- coxph(Surv(os, vital_status)~ GENE, data=df2.cat)  
ggforest(fit.coxph2,data = df2.cat)
```

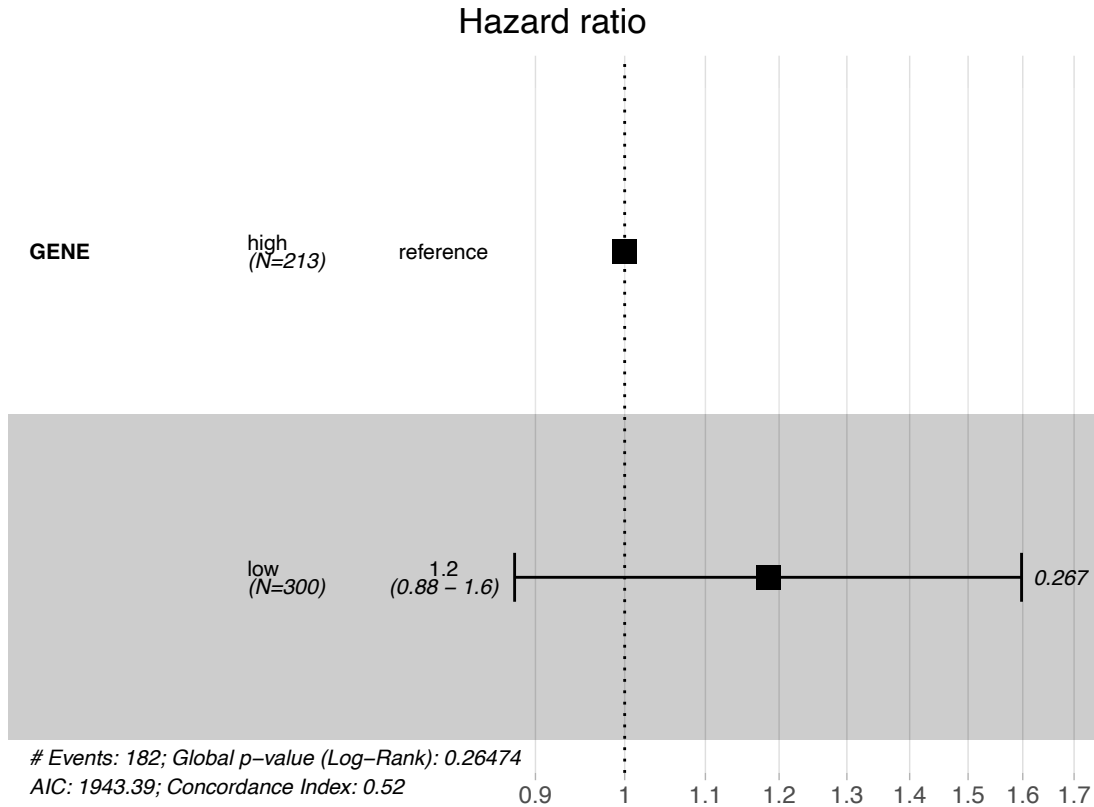

```
print(fit2)
```

```
## Call: survfit(formula = Surv(os, vital_status) ~ GENE, data = df2.cat)
##
## 9 observations deleted due to missingness
##      n events median 0.95LCL 0.95UCL
## GENE=high 211     71  4.19   3.31   7.35
## GENE=low  293    111  4.09   3.37   4.73
```

```
print(fit.coxph2)
```

```
## Call:
## coxph(formula = Surv(os, vital_status) ~ GENE, data = df2.cat)
##
##      coef exp(coef) se(coef)      z      p
## GENElow 0.1693    1.1845  0.1527  1.109 0.267
##
## Likelihood ratio test=1.24 on 1 df, p=0.2647
## n= 504, number of events= 182
## (9 observations deleted due to missingness)
```

```
coxph(Surv(os, vital_status)~GENE, data=df2.cat) %>%
gtsummary::tbl_regression(exp = TRUE)
```

```
## Table printed with 'knitr::kable()', not {gt}. Learn why at
## http://www.danielsjoberg.com/gtsummary/articles/rmarkdown.html
## To suppress this message, include 'message = FALSE' in code chunk header.
```

| Characteristic | HR   | 95% CI     | p-value |
|----------------|------|------------|---------|
| GENE           |      |            |         |
| high           |      |            |         |
| low            | 1.18 | 0.88, 1.60 | 0.3     |

```
summary(fit2)$table
```

```
##           records n.max n.start events  *rmean *se(rmean)  median 0.95LCL
## GENE=high      211   211    211     71 8.357805  0.9818366 4.194521 3.312329
## GENE=low       293   293    293    111 6.332918  0.8630399 4.087671 3.367123
##           0.95UCL
## GENE=high 7.345205
## GENE=low  4.726027
```

```
#hsa-mir-22+184
```

```
merged6 <- merge(df1.cat,df2.cat)
merged6
```

```
##           os vital_status GENE
## 1  0.00000000           1 low
## 2  0.00000000           1 low
## 3  0.00000000           1 low
## 4  0.00000000           1 low
## 5  0.00000000           1 low
## 6  0.00000000           1 low
## 7  0.00000000           2 low
## 8  0.04109589           1 low
## 9  0.04931507           2 low
## 10 0.06027397           2 low
## 11 0.07671233           1 low
## 12 0.09041096           2 low
## 13 0.09863014           1 low
## 14 0.12054795           1 low
## 15 0.12054795           1 low
## 16 0.13150685           1 low
## 17 0.16986301           1 low
## 18 0.16986301           2 low
## 19 0.21643836           1 low
## 20 0.23013699           1 low
## 21 0.23013699           1 low
## 22 0.23013699           1 low
## 23 0.23013699           1 low
## 24 0.24931507           2 low
## 25 0.26575342           2 low
## 26 0.27123288           2 low
```

|       |            |   |      |
|-------|------------|---|------|
| ## 27 | 0.31780822 | 2 | low  |
| ## 28 | 0.32602740 | 1 | low  |
| ## 29 | 0.32602740 | 2 | low  |
| ## 30 | 0.33150685 | 2 | low  |
| ## 31 | 0.38082192 | 2 | low  |
| ## 32 | 0.38630137 | 1 | low  |
| ## 33 | 0.41369863 | 1 | low  |
| ## 34 | 0.46849315 | 2 | low  |
| ## 35 | 0.47397260 | 2 | low  |
| ## 36 | 0.47671233 | 1 | low  |
| ## 37 | 0.49041096 | 1 | low  |
| ## 38 | 0.49041096 | 2 | low  |
| ## 39 | 0.49863014 | 1 | low  |
| ## 40 | 0.50410959 | 1 | low  |
| ## 41 | 0.50958904 | 1 | low  |
| ## 42 | 0.50958904 | 1 | low  |
| ## 43 | 0.51232877 | 2 | low  |
| ## 44 | 0.52876712 | 2 | low  |
| ## 45 | 0.55342466 | 1 | low  |
| ## 46 | 0.57534247 | 2 | low  |
| ## 47 | 0.61643836 | 1 | low  |
| ## 48 | 0.63013699 | 1 | low  |
| ## 49 | 0.66849315 | 2 | low  |
| ## 50 | 0.66849315 | 2 | low  |
| ## 51 | 0.70410959 | 2 | low  |
| ## 52 | 0.70684932 | 2 | low  |
| ## 53 | 0.72328767 | 1 | low  |
| ## 54 | 0.73424658 | 2 | low  |
| ## 55 | 0.75342466 | 2 | low  |
| ## 56 | 0.76986301 | 2 | low  |
| ## 57 | 0.77260274 | 2 | low  |
| ## 58 | 0.78082192 | 1 | low  |
| ## 59 | 0.78630137 | 1 | low  |
| ## 60 | 0.79726027 | 2 | low  |
| ## 61 | 0.82191781 | 2 | low  |
| ## 62 | 0.83013699 | 2 | low  |
| ## 63 | 0.84109589 | 1 | low  |
| ## 64 | 0.84109589 | 2 | low  |
| ## 65 | 0.84383562 | 2 | low  |
| ## 66 | 0.84931507 | 1 | low  |
| ## 67 | 0.87945205 | 2 | high |
| ## 68 | 0.87945205 | 2 | high |
| ## 69 | 0.88493151 | 1 | low  |
| ## 70 | 0.92054795 | 2 | low  |
| ## 71 | 0.92054795 | 2 | low  |
| ## 72 | 0.92054795 | 2 | low  |
| ## 73 | 0.92054795 | 2 | low  |
| ## 74 | 0.92876712 | 2 | low  |
| ## 75 | 0.96164384 | 1 | low  |
| ## 76 | 0.96986301 | 2 | low  |
| ## 77 | 1.00000000 | 1 | low  |
| ## 78 | 1.01369863 | 2 | low  |
| ## 79 | 1.01917808 | 1 | low  |
| ## 80 | 1.02739726 | 2 | low  |



|        |            |   |      |
|--------|------------|---|------|
| ## 81  | 1.03013699 | 2 | low  |
| ## 82  | 1.05479452 | 1 | low  |
| ## 83  | 1.05479452 | 1 | low  |
| ## 84  | 1.05479452 | 2 | low  |
| ## 85  | 1.12054795 | 2 | low  |
| ## 86  | 1.13424658 | 1 | low  |
| ## 87  | 1.13424658 | 2 | low  |
| ## 88  | 1.13698630 | 1 | high |
| ## 89  | 1.13698630 | 1 | high |
| ## 90  | 1.14246575 | 1 | low  |
| ## 91  | 1.16164384 | 1 | low  |
| ## 92  | 1.16986301 | 1 | low  |
| ## 93  | 1.17260274 | 2 | low  |
| ## 94  | 1.18904110 | 2 | low  |
| ## 95  | 1.18904110 | 2 | low  |
| ## 96  | 1.19178082 | 1 | high |
| ## 97  | 1.19178082 | 1 | high |
| ## 98  | 1.19178082 | 1 | low  |
| ## 99  | 1.19178082 | 1 | low  |
| ## 100 | 1.20547945 | 2 | low  |
| ## 101 | 1.21643836 | 2 | low  |
| ## 102 | 1.21643836 | 2 | low  |
| ## 103 | 1.22191781 | 1 | low  |
| ## 104 | 1.22739726 | 1 | low  |
| ## 105 | 1.22739726 | 1 | low  |
| ## 106 | 1.22739726 | 1 | low  |
| ## 107 | 1.22739726 | 1 | low  |
| ## 108 | 1.24657534 | 1 | low  |
| ## 109 | 1.25205479 | 2 | low  |
| ## 110 | 1.26027397 | 2 | low  |
| ## 111 | 1.28219178 | 2 | low  |
| ## 112 | 1.28219178 | 2 | low  |
| ## 113 | 1.30410959 | 1 | low  |
| ## 114 | 1.30410959 | 1 | low  |
| ## 115 | 1.30410959 | 1 | low  |
| ## 116 | 1.30410959 | 1 | low  |
| ## 117 | 1.30410959 | 1 | low  |
| ## 118 | 1.30410959 | 1 | low  |
| ## 119 | 1.30410959 | 1 | low  |
| ## 120 | 1.30410959 | 1 | low  |
| ## 121 | 1.30410959 | 1 | low  |
| ## 122 | 1.30958904 | 1 | low  |
| ## 123 | 1.30958904 | 2 | low  |
| ## 124 | 1.31780822 | 1 | low  |
| ## 125 | 1.32602740 | 1 | low  |
| ## 126 | 1.33150685 | 1 | low  |
| ## 127 | 1.33424658 | 1 | low  |
| ## 128 | 1.33698630 | 2 | low  |
| ## 129 | 1.34794521 | 1 | low  |
| ## 130 | 1.38356164 | 1 | high |
| ## 131 | 1.42465753 | 1 | low  |
| ## 132 | 1.44109589 | 1 | low  |
| ## 133 | 1.45479452 | 1 | low  |
| ## 134 | 1.47123288 | 1 | low  |

|        |            |        |
|--------|------------|--------|
| ## 135 | 1.47671233 | 1 high |
| ## 136 | 1.48219178 | 1 low  |
| ## 137 | 1.49863014 | 1 low  |
| ## 138 | 1.50684932 | 2 low  |
| ## 139 | 1.51506849 | 1 low  |
| ## 140 | 1.52602740 | 2 low  |
| ## 141 | 1.53698630 | 2 low  |
| ## 142 | 1.54520548 | 1 low  |
| ## 143 | 1.54794521 | 1 low  |
| ## 144 | 1.55342466 | 1 low  |
| ## 145 | 1.55616438 | 1 low  |
| ## 146 | 1.55616438 | 1 low  |
| ## 147 | 1.55616438 | 1 low  |
| ## 148 | 1.55616438 | 1 low  |
| ## 149 | 1.55616438 | 1 low  |
| ## 150 | 1.55616438 | 1 low  |
| ## 151 | 1.55616438 | 1 low  |
| ## 152 | 1.55616438 | 1 low  |
| ## 153 | 1.55616438 | 1 low  |
| ## 154 | 1.57260274 | 2 low  |
| ## 155 | 1.58356164 | 1 high |
| ## 156 | 1.58356164 | 1 high |
| ## 157 | 1.58356164 | 1 high |
| ## 158 | 1.58356164 | 1 high |
| ## 159 | 1.58356164 | 1 low  |
| ## 160 | 1.61917808 | 1 low  |
| ## 161 | 1.62191781 | 1 low  |
| ## 162 | 1.62465753 | 2 low  |
| ## 163 | 1.65205479 | 1 high |
| ## 164 | 1.65205479 | 1 high |
| ## 165 | 1.65205479 | 1 high |
| ## 166 | 1.65753425 | 1 low  |
| ## 167 | 1.65753425 | 1 low  |
| ## 168 | 1.66301370 | 2 high |
| ## 169 | 1.66849315 | 1 low  |
| ## 170 | 1.67123288 | 1 high |
| ## 171 | 1.67123288 | 1 low  |
| ## 172 | 1.67123288 | 1 low  |
| ## 173 | 1.67123288 | 1 low  |
| ## 174 | 1.67123288 | 1 low  |
| ## 175 | 1.69041096 | 1 low  |
| ## 176 | 1.69041096 | 1 low  |
| ## 177 | 1.70958904 | 1 high |
| ## 178 | 1.71506849 | 1 high |
| ## 179 | 1.71506849 | 1 low  |
| ## 180 | 1.71506849 | 2 low  |
| ## 181 | 1.72054795 | 2 low  |
| ## 182 | 1.72602740 | 1 low  |
| ## 183 | 1.73698630 | 1 low  |
| ## 184 | 1.78356164 | 1 low  |
| ## 185 | 1.78356164 | 1 low  |
| ## 186 | 1.78356164 | 1 low  |
| ## 187 | 1.78356164 | 1 low  |
| ## 188 | 1.78630137 | 1 low  |

|        |             |   |      |
|--------|-------------|---|------|
| ## 189 | 1.78630137  | 1 | low  |
| ## 190 | 1.78630137  | 1 | low  |
| ## 191 | 1.78630137  | 1 | low  |
| ## 192 | 1.78904110  | 1 | low  |
| ## 193 | 1.78904110  | 2 | low  |
| ## 194 | 1.80273973  | 1 | high |
| ## 195 | 1.80273973  | 1 | high |
| ## 196 | 1.81917808  | 1 | low  |
| ## 197 | 1.82465753  | 2 | low  |
| ## 198 | 1.83287671  | 1 | low  |
| ## 199 | 1.83561644  | 1 | low  |
| ## 200 | 1.83561644  | 1 | low  |
| ## 201 | 1.83561644  | 1 | low  |
| ## 202 | 1.83561644  | 1 | low  |
| ## 203 | 1.85479452  | 1 | low  |
| ## 204 | 1.85479452  | 2 | low  |
| ## 205 | 1.88767123  | 1 | low  |
| ## 206 | 1.89041096  | 1 | low  |
| ## 207 | 1.89315068  | 1 | low  |
| ## 208 | 1.92054795  | 1 | high |
| ## 209 | 1.92054795  | 2 | low  |
| ## 210 | 1.92876712  | 1 | high |
| ## 211 | 1.92876712  | 1 | high |
| ## 212 | 1.92876712  | 1 | high |
| ## 213 | 1.92876712  | 1 | high |
| ## 214 | 1.93150685  | 1 | high |
| ## 215 | 1.93150685  | 1 | low  |
| ## 216 | 1.96712329  | 1 | low  |
| ## 217 | 1.96986301  | 1 | low  |
| ## 218 | 1.98082192  | 1 | low  |
| ## 219 | 1.99452055  | 1 | low  |
| ## 220 | 10.06575342 | 1 | high |
| ## 221 | 10.79452055 | 1 | low  |
| ## 222 | 13.59178082 | 2 | low  |
| ## 223 | 13.67671233 | 1 | high |
| ## 224 | 19.85753425 | 1 | low  |
| ## 225 | 2.00273973  | 2 | low  |
| ## 226 | 2.03013699  | 1 | low  |
| ## 227 | 2.08219178  | 2 | low  |
| ## 228 | 2.08493151  | 1 | low  |
| ## 229 | 2.08493151  | 1 | low  |
| ## 230 | 2.08493151  | 2 | low  |
| ## 231 | 2.11780822  | 1 | low  |
| ## 232 | 2.12328767  | 1 | low  |
| ## 233 | 2.12876712  | 2 | low  |
| ## 234 | 2.16712329  | 1 | high |
| ## 235 | 2.16712329  | 1 | low  |
| ## 236 | 2.16712329  | 1 | low  |
| ## 237 | 2.16712329  | 1 | low  |
| ## 238 | 2.16712329  | 1 | low  |
| ## 239 | 2.16712329  | 1 | low  |
| ## 240 | 2.16712329  | 1 | low  |
| ## 241 | 2.16712329  | 1 | low  |
| ## 242 | 2.16712329  | 1 | low  |

|        |            |   |      |
|--------|------------|---|------|
| ## 243 | 2.16712329 | 1 | low  |
| ## 244 | 2.20547945 | 1 | high |
| ## 245 | 2.21095890 | 2 | low  |
| ## 246 | 2.21369863 | 2 | low  |
| ## 247 | 2.22739726 | 1 | high |
| ## 248 | 2.25753425 | 1 | low  |
| ## 249 | 2.25753425 | 1 | low  |
| ## 250 | 2.25753425 | 1 | low  |
| ## 251 | 2.25753425 | 1 | low  |
| ## 252 | 2.26301370 | 2 | low  |
| ## 253 | 2.26575342 | 1 | low  |
| ## 254 | 2.27123288 | 1 | low  |
| ## 255 | 2.27397260 | 1 | low  |
| ## 256 | 2.29863014 | 1 | high |
| ## 257 | 2.30684932 | 1 | low  |
| ## 258 | 2.31506849 | 1 | low  |
| ## 259 | 2.36438356 | 1 | low  |
| ## 260 | 2.36712329 | 1 | low  |
| ## 261 | 2.38904110 | 1 | low  |
| ## 262 | 2.41643836 | 1 | high |
| ## 263 | 2.41643836 | 1 | low  |
| ## 264 | 2.45479452 | 2 | low  |
| ## 265 | 2.45479452 | 2 | low  |
| ## 266 | 2.45479452 | 2 | low  |
| ## 267 | 2.45479452 | 2 | low  |
| ## 268 | 2.47945205 | 2 | low  |
| ## 269 | 2.49315068 | 1 | low  |
| ## 270 | 2.49863014 | 1 | low  |
| ## 271 | 2.50136986 | 1 | high |
| ## 272 | 2.54520548 | 2 | low  |
| ## 273 | 2.54794521 | 1 | low  |
| ## 274 | 2.59452055 | 1 | low  |
| ## 275 | 2.60821918 | 2 | low  |
| ## 276 | 2.67397260 | 2 | low  |
| ## 277 | 2.70410959 | 2 | low  |
| ## 278 | 2.70684932 | 1 | low  |
| ## 279 | 2.72602740 | 2 | low  |
| ## 280 | 2.72602740 | 2 | low  |
| ## 281 | 2.81095890 | 2 | low  |
| ## 282 | 2.83835616 | 1 | low  |
| ## 283 | 2.84931507 | 1 | low  |
| ## 284 | 2.90410959 | 1 | low  |
| ## 285 | 2.93424658 | 1 | low  |
| ## 286 | 2.93698630 | 1 | low  |
| ## 287 | 2.93972603 | 2 | low  |
| ## 288 | 3.00547945 | 1 | low  |
| ## 289 | 3.08219178 | 1 | low  |
| ## 290 | 3.08493151 | 1 | low  |
| ## 291 | 3.08493151 | 1 | low  |
| ## 292 | 3.08493151 | 1 | low  |
| ## 293 | 3.08493151 | 1 | low  |
| ## 294 | 3.10958904 | 2 | low  |
| ## 295 | 3.11232877 | 2 | low  |
| ## 296 | 3.14520548 | 1 | low  |

|        |            |   |      |
|--------|------------|---|------|
| ## 297 | 3.16986301 | 1 | low  |
| ## 298 | 3.20821918 | 2 | low  |
| ## 299 | 3.21917808 | 1 | low  |
| ## 300 | 3.22739726 | 1 | low  |
| ## 301 | 3.25753425 | 1 | low  |
| ## 302 | 3.25753425 | 1 | low  |
| ## 303 | 3.25753425 | 1 | low  |
| ## 304 | 3.25753425 | 1 | low  |
| ## 305 | 3.27945205 | 2 | low  |
| ## 306 | 3.32876712 | 2 | low  |
| ## 307 | 3.36712329 | 2 | low  |
| ## 308 | 3.37808219 | 1 | low  |
| ## 309 | 3.38356164 | 2 | low  |
| ## 310 | 3.46575342 | 2 | high |
| ## 311 | 3.47397260 | 2 | low  |
| ## 312 | 3.48493151 | 1 | low  |
| ## 313 | 3.52054795 | 1 | low  |
| ## 314 | 3.53150685 | 1 | high |
| ## 315 | 3.54246575 | 2 | low  |
| ## 316 | 3.56438356 | 1 | low  |
| ## 317 | 3.57534247 | 1 | low  |
| ## 318 | 3.62739726 | 1 | low  |
| ## 319 | 3.65205479 | 1 | low  |
| ## 320 | 3.71780822 | 2 | low  |
| ## 321 | 3.74520548 | 1 | low  |
| ## 322 | 3.75068493 | 1 | low  |
| ## 323 | 3.89315068 | 2 | low  |
| ## 324 | 3.91506849 | 1 | low  |
| ## 325 | 3.92054795 | 1 | low  |
| ## 326 | 3.92328767 | 1 | low  |
| ## 327 | 3.98356164 | 2 | low  |
| ## 328 | 4.03835616 | 1 | low  |
| ## 329 | 4.05205479 | 1 | low  |
| ## 330 | 4.08767123 | 2 | low  |
| ## 331 | 4.10410959 | 2 | low  |
| ## 332 | 4.10684932 | 2 | low  |
| ## 333 | 4.11232877 | 2 | low  |
| ## 334 | 4.17260274 | 1 | low  |
| ## 335 | 4.38356164 | 2 | low  |
| ## 336 | 4.47123288 | 2 | low  |
| ## 337 | 4.52876712 | 2 | low  |
| ## 338 | 4.61095890 | 1 | low  |
| ## 339 | 4.72602740 | 2 | low  |
| ## 340 | 4.73424658 | 1 | low  |
| ## 341 | 4.79452055 | 1 | low  |
| ## 342 | 4.90410959 | 2 | low  |
| ## 343 | 5.12328767 | 1 | low  |
| ## 344 | 5.38356164 | 1 | low  |
| ## 345 | 5.40821918 | 1 | low  |
| ## 346 | 5.55342466 | 2 | low  |
| ## 347 | 5.65753425 | 1 | low  |
| ## 348 | 5.66301370 | 1 | low  |
| ## 349 | 5.77808219 | 1 | low  |
| ## 350 | 5.92054795 | 1 | low  |

```

## 351 5.95616438      2 low
## 352 6.19452055      1 low
## 353 6.48767123      1 low
## 354 6.89041096      1 low
## 355 7.09589041      1 low
## 356 7.10958904      1 low
## 357 7.16986301      2 low
## 358 7.17808219      2 low
## 359 7.33150685      1 low
## 360 7.75890411      1 low
## 361 8.47671233      1 low
## 362 9.05479452      1 high
## 363 9.95890411      1 low
## 364      NA          1 high
## 365      NA          1 high
## 366      NA          1 low
## 367      NA          1 low
## 368      NA          1 low
## 369      NA          1 low
## 370      NA          1 low
## 371      NA          1 low
## 372      NA          1 low
## 373      NA          1 low
## 374      NA          1 low
## 375      NA          1 low
## 376      NA          1 low
## 377      NA          1 low
## 378      NA          2 low
## 379      NA          2 low
## 380      NA          2 low
## 381      NA          2 low
## 382      NA          2 low
## 383      NA          2 low
## 384      NA          2 low
## 385      NA          2 low
## 386      NA          2 low
## 387      NA          2 low
## 388      NA          2 low
## 389      NA          2 low
## 390      NA          2 low
## 391      NA          2 low
## 392      NA          2 low
## 393      NA          2 low

```

```
fit8<- survfit(Surv(os, vital_status)~ GENE, data=merged6)
```

```
#Plot_KM
```

```

ggsurvplot(fit8,data = merged6,title      = "hsa-mir-22+184", size = 1 ,xlim = c(0, 5), risk.table = TRUE
  font.subtitle = c(20, "bold.plain", "black"),
  font.caption = c(25, "plain", "black"),
  font.x = c(25, "plain", "black"),
  font.y = c(25, "plain", "black"),
  font.tickslab = c(24, "plain", "black"), fun = "pct", break.x.by =1, ylim=c(0,100))

```

```
## Warning: Vectorized input to 'element_text()' is not officially supported.
## Results may be unexpected or may change in future versions of ggplot2.
```

# hsa-mir-22+184

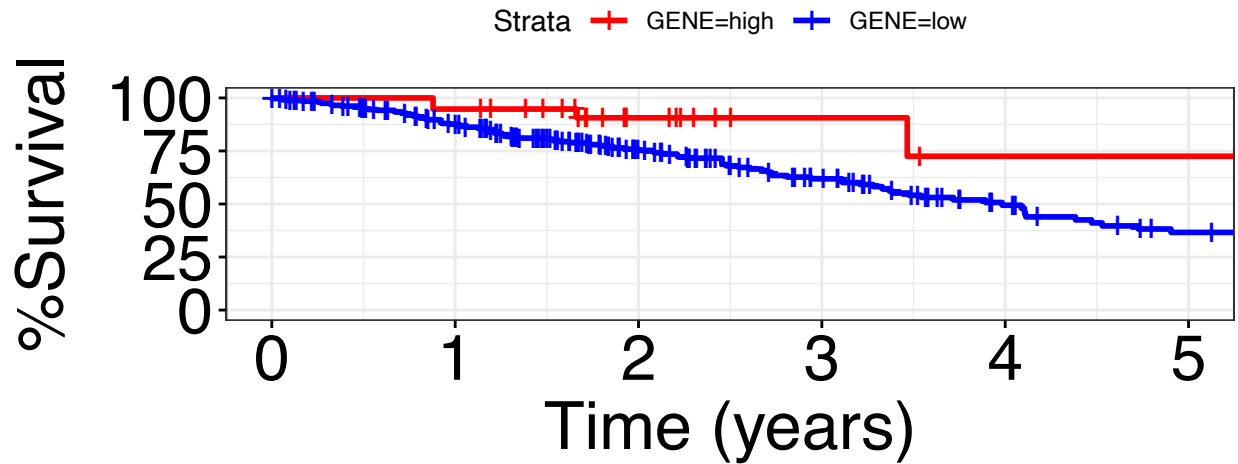

Number at risk

| Strata    | 0   | 1   | 2   | 3  | 4  | 5  |
|-----------|-----|-----|-----|----|----|----|
| GENE=high | 38  | 36  | 11  | 5  | 3  | 3  |
| GENE=low  | 325 | 251 | 133 | 76 | 38 | 23 |

Time (years)

```
ggsurvplot(fit8,data = merged6,title = "hsa-mir-22+184", size = 1,xlim = c(0, 5),xlab = "Time (years)",
font.subtitle = c(20, "bold.plain", "black"),
font.caption = c(25, "plain", "black"),
font.x = c(25, "plain", "black"),
font.y = c(25, "plain", "black"),
font.tickslab = c(24, "plain", "black"), fun = "pct", break.x.by =1, ylim=c(0,100))
```

# hsa-mir-22+184

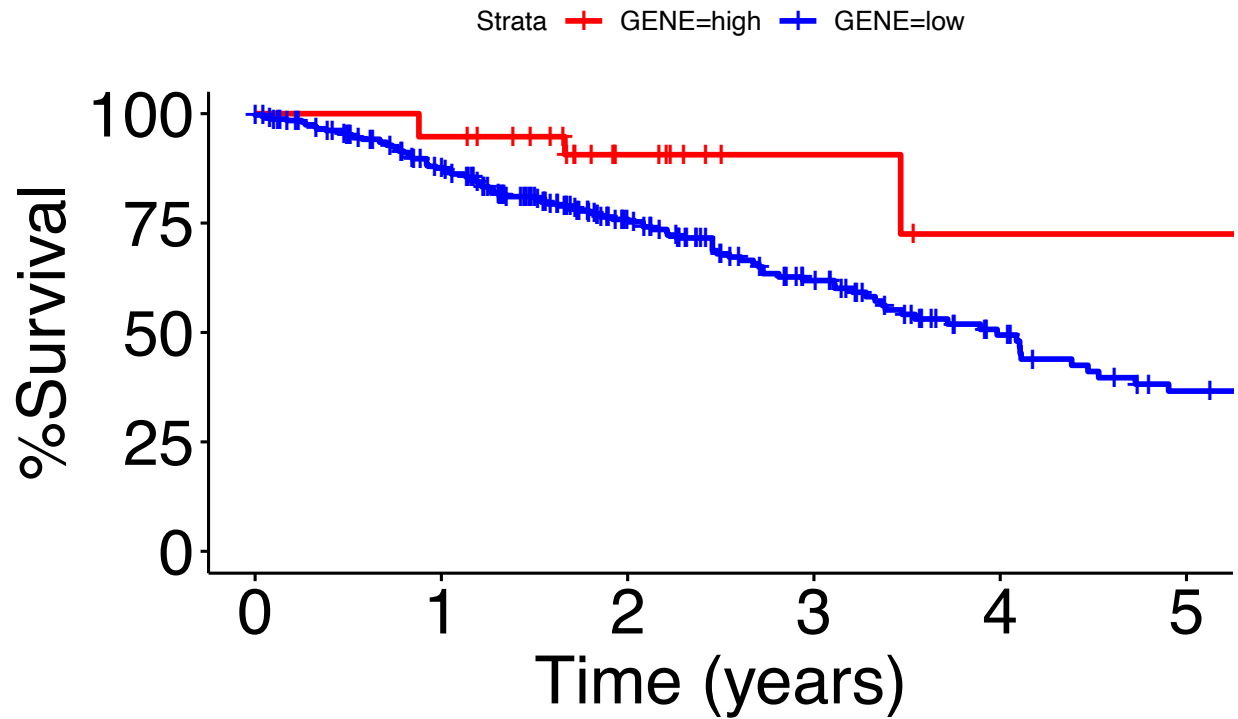

```
ggsurvplot(fit8,data = merged6,title = "hsa-mir-22+184", size = 1 ,xlim = c(0, 10), risk.table = TRUE,
font.subtitle = c(20, "bold.plain", "black"),
font.caption = c(25, "plain", "black"),
font.x = c(25, "plain", "black"),
font.y = c(25, "plain", "black"),
font.tickslab = c(24, "plain", "black"), fun = "pct", break.x.by =1, ylim=c(0,100))
```

```
## Warning: Vectorized input to 'element_text()' is not officially supported.
## Results may be unexpected or may change in future versions of ggplot2.
```



# hsa-mir-22+184

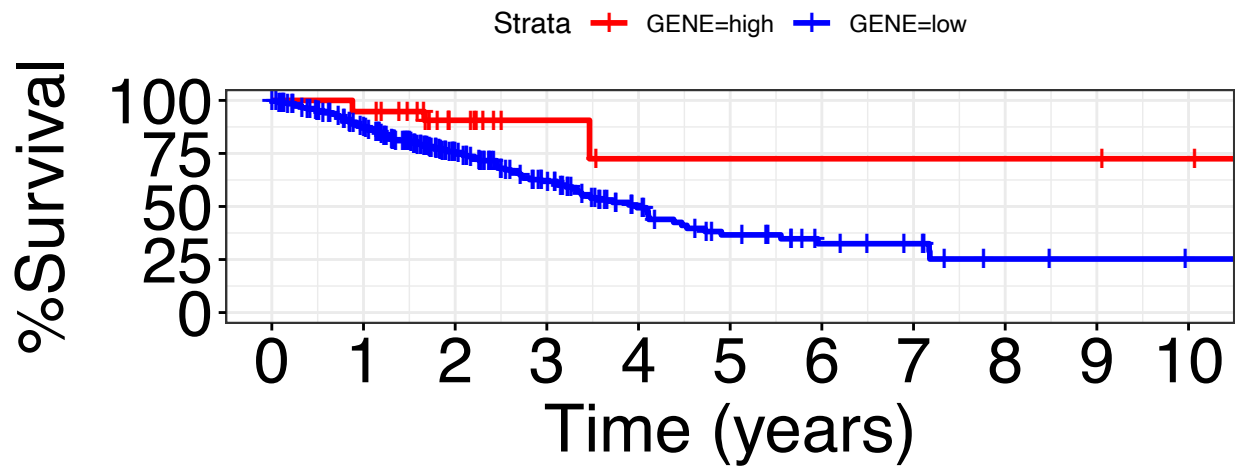

Number at risk

|        |           | 0   | 1   | 2   | 3  | 4  | 5  | 6  | 7  | 8 | 9 | 10 |
|--------|-----------|-----|-----|-----|----|----|----|----|----|---|---|----|
| Strata | GENE=high | 38  | 36  | 11  | 5  | 3  | 3  | 3  | 3  | 3 | 3 | 2  |
|        | GENE=low  | 325 | 251 | 133 | 76 | 38 | 23 | 14 | 11 | 5 | 4 | 3  |

```
ggsurvplot(fit8,data = merged6,title = "hsa-mir-22+184", size = 1,xlim = c(0, 10), xlab = "Time (years)",
font.subtitle = c(20, "bold.plain", "black"),
font.caption = c(25, "plain", "black"),
font.x = c(25, "plain", "black"),
font.y = c(25, "plain", "black"),
font.tickslab = c(24, "plain", "black"), fun = "pct", break.x.by =1, ylim=c(0,100))
```

# hsa-mir-22+184

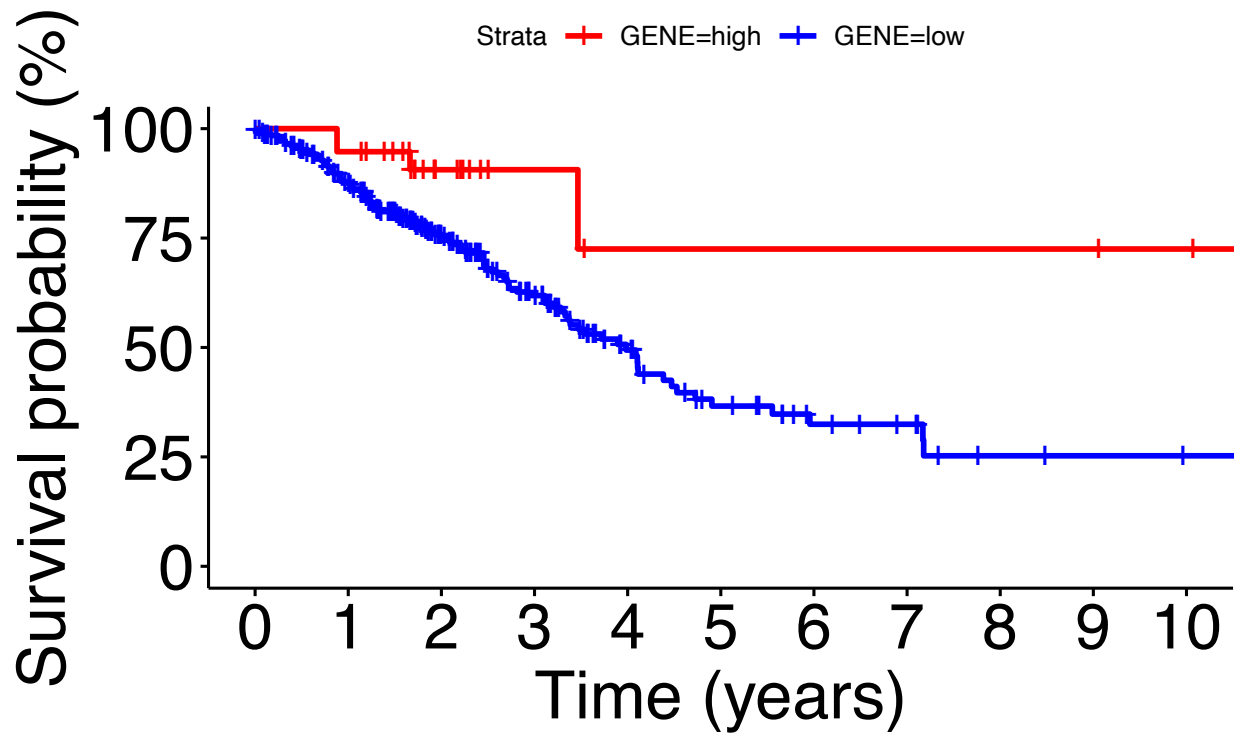

*#Cox\_Regression*

```
fit.coxph1<- coxph(Surv(os, vital_status)~ GENE, data=merged6)  
ggforest(fit.coxph1,data = merged6)
```

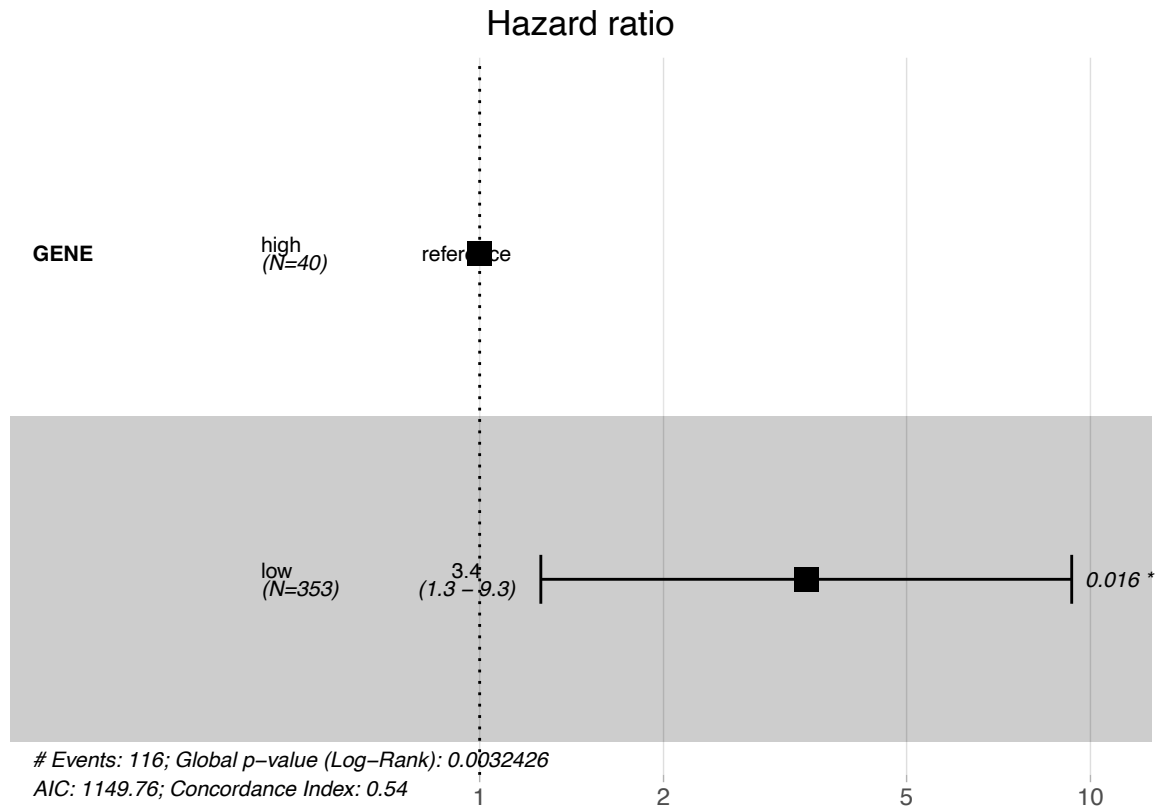

```
print(fit8)
```

```
## Call: survfit(formula = Surv(os, vital_status) ~ GENE, data = merged6)
##
##      30 observations deleted due to missingness
##              n events median 0.95LCL 0.95UCL
## GENE=high   38      4    NA      3.47    NA
## GENE=low   325    112   3.98   3.37    4.73
```

```
print(fit.coxph1)
```

```
## Call:
## coxph(formula = Surv(os, vital_status) ~ GENE, data = merged6)
##
##              coef exp(coef) se(coef)      z      p
## GENElow 1.2313    3.4255   0.5105  2.412 0.0159
##
## Likelihood ratio test=8.67 on 1 df, p=0.003243
## n= 363, number of events= 116
## (30 observations deleted due to missingness)
```

```
coxph(Surv(os, vital_status)~ GENE, data=merged6) %>%
gtsummary::tbl_regression(exp = TRUE)
```

```
## Table printed with 'knitr::kable()', not {gt}. Learn why at
## http://www.danielsjoberg.com/gtsummary/articles/rmarkdown.html
## To suppress this message, include 'message = FALSE' in code chunk header.
```

| Characteristic | HR   | 95% CI     | p-value |
|----------------|------|------------|---------|
| GENE           |      |            |         |
| high           |      |            |         |
| low            | 3.43 | 1.26, 9.32 | 0.016   |

```
summary(fit8)$table
```

```
##           records n.max n.start events   *rmean *se(rmean)  median 0.95LCL
## GENE=high      38    38     38      4 15.138481  2.7782600      NA 3.465753
## GENE=low      325   325    325    112 6.559784  0.9027472 3.983562 3.367123
##           0.95UCL
## GENE=high      NA
## GENE=low      4.726027
```

# Combining Plasma Extracellular Vesicle Let-7b-5p, miR-184 and Circulating miR-22-3p Levels for NSCLC Diagnosis and Drug Resistance Prediction

G. P. Vadla<sup>1</sup>, B. Daghat<sup>1</sup>, N. Patterson<sup>1</sup>, V. Ahmad<sup>1</sup>, G. Perez<sup>1\*</sup>, A. Garcia<sup>1\*</sup>, Y. Manjunath<sup>2</sup>, J.T. Kaiff<sup>2,3</sup>, G. Li<sup>2</sup>, and C.Y. Chabu<sup>1,2,3\*</sup>

## Supplementary information 2. R session information for covariate analyses

## – Session info

---

## setting value

## version R version 4.1.0 (2021-05-18)

## os Ubuntu 20.04.2 LTS

## system x86\_64, linux-gnu

## ui X11

## language (EN)

## collate en\_US.UTF-8

## ctype en\_US.UTF-8

## tz Etc/UTC

## date 2021-08-05

## – Packages

---

| package         | * version | date       | lib | source         |
|-----------------|-----------|------------|-----|----------------|
| ## abind        | 1.4-5     | 2016-07-21 | [1] | RSPM (R 4.0.3) |
| ## assertthat   | 0.2.1     | 2019-03-21 | [1] | RSPM (R 4.1.0) |
| ## backports    | 1.2.1     | 2020-12-09 | [1] | RSPM (R 4.1.0) |
| ## Biobase      | * 2.52.0  | 2021-05-19 | [1] | Bioconductor   |
| ## BiocGenerics | * 0.38.0  | 2021-05-19 | [1] | Bioconductor   |
| ## broom        | 0.7.9     | 2021-07-27 | [1] | RSPM (R 4.0.5) |
| ## bslib        | 0.2.5.1   | 2021-05-18 | [1] | RSPM (R 4.1.0) |
| ## cachem       | 1.0.5     | 2021-05-15 | [1] | RSPM (R 4.1.0) |
| ## callr        | 3.7.0     | 2021-04-20 | [1] | RSPM (R 4.1.0) |
| ## car          | 3.0-11    | 2021-06-27 | [1] | RSPM (R 4.0.5) |
| ## carData      | 3.0-4     | 2020-05-22 | [1] | RSPM (R 4.0.3) |
| ## cellranger   | 1.1.0     | 2016-07-27 | [1] | RSPM (R 4.1.0) |
| ## cli          | 3.0.1     | 2021-07-17 | [1] | RSPM (R 4.0.5) |
| ## colorspace   | 2.0-2     | 2021-06-24 | [1] | RSPM (R 4.1.0) |
| ## crayon       | 1.4.1     | 2021-02-08 | [1] | RSPM (R 4.1.0) |
| ## crosstalk    | 1.1.1     | 2021-01-12 | [1] | RSPM (R 4.0.3) |
| ## curl         | 4.3.2     | 2021-06-23 | [1] | RSPM (R 4.1.0) |
| ## data.table   | 1.14.0    | 2021-02-21 | [1] | RSPM (R 4.1.0) |
| ## DBI          | 1.1.1     | 2021-01-15 | [1] | RSPM (R 4.1.0) |
| ## desc         | 1.3.0     | 2021-03-05 | [1] | RSPM (R 4.1.0) |
| ## devtools     | 2.4.2     | 2021-06-07 | [1] | RSPM (R 4.1.0) |
| ## digest       | 0.6.27    | 2020-10-24 | [1] | RSPM (R 4.1.0) |
| ## dplyr        | * 1.0.7   | 2021-06-18 | [1] | RSPM (R 4.1.0) |
| ## DT           | * 0.18    | 2021-04-14 | [1] | RSPM (R 4.0.4) |

```
## edgeR      * 3.34.0 2021-05-19 [1] Bioconductor
## ellipsis  0.3.2 2021-04-29 [1] RSPM (R 4.1.0)
## evaluate  0.14 2019-05-28 [1] RSPM (R 4.1.0)
## fansi     0.5.0 2021-05-25 [1] RSPM (R 4.1.0)
## farver    2.1.0 2021-02-28 [1] RSPM (R 4.1.0)
## fastmap   1.1.0 2021-01-25 [1] RSPM (R 4.1.0)
## forcats   0.5.1 2021-01-27 [1] RSPM (R 4.1.0)
## foreign   0.8-81 2020-12-22 [2] CRAN (R 4.1.0)
## fs        1.5.0 2020-07-31 [1] RSPM (R 4.1.0)
## generics  0.1.0 2020-10-31 [1] RSPM (R 4.1.0)
## GGally    * 2.1.2 2021-06-21 [1] RSPM (R 4.0.5)
## ggplot2   * 3.3.5 2021-06-25 [1] RSPM (R 4.1.0)
## ggpubr    * 0.4.0 2020-06-27 [1] RSPM (R 4.0.3)
## ggrepel   * 0.9.1 2021-01-15 [1] RSPM (R 4.0.5)
## ggsignif  0.6.2 2021-06-14 [1] RSPM (R 4.0.5)
## glue      1.4.2 2020-08-27 [1] RSPM (R 4.1.0)
## gtable    0.3.0 2019-03-25 [1] RSPM (R 4.1.0)
## haven     2.4.1 2021-04-23 [1] RSPM (R 4.1.0)
## highr     0.9 2021-04-16 [1] RSPM (R 4.1.0)
## hms       1.1.0 2021-05-17 [1] RSPM (R 4.1.0)
## htmltools 0.5.1.1 2021-01-22 [1] RSPM (R 4.1.0)
## htmlwidgets 1.5.3 2020-12-10 [1] RSPM (R 4.1.0)
## httr      1.4.2 2020-07-20 [1] RSPM (R 4.1.0)
## jquerylib 0.1.4 2021-04-26 [1] RSPM (R 4.1.0)
## jsonlite  1.7.2 2020-12-09 [1] RSPM (R 4.1.0)
## kableExtra * 1.3.4 2021-02-20 [1] RSPM (R 4.0.3)
## knitr     1.33 2021-04-24 [1] RSPM (R 4.1.0)
## labeling  0.4.2 2020-10-20 [1] RSPM (R 4.1.0)
## lattice   0.20-44 2021-05-02 [2] CRAN (R 4.1.0)
## lazyeval  0.2.2 2019-03-15 [1] RSPM (R 4.0.3)
## lifecycle 1.0.0 2021-02-15 [1] RSPM (R 4.1.0)
## limma     * 3.48.1 2021-06-24 [1] Bioconductor
## locfit    1.5-9.4 2020-03-25 [1] RSPM (R 4.0.3)
## magrittr  * 2.0.1 2020-11-17 [1] RSPM (R 4.1.0)
## Matrix    1.3-3 2021-05-04 [2] CRAN (R 4.1.0)
## memoise   2.0.0 2021-01-26 [1] RSPM (R 4.1.0)
## mgcv      1.8-35 2021-04-18 [2] CRAN (R 4.1.0)
## mime      0.11 2021-06-23 [1] RSPM (R 4.1.0)
## munsell   0.5.0 2018-06-12 [1] RSPM (R 4.1.0)
## nlme      3.1-152 2021-02-04 [2] CRAN (R 4.1.0)
## openxlsx  4.2.4 2021-06-16 [1] RSPM (R 4.0.5)
## pcaMethods * 1.84.0 2021-05-19 [1] Bioconductor
## pheatmap  * 1.0.12 2019-01-04 [1] RSPM (R 4.0.3)
```

```
## pillar      1.6.1 2021-05-16 [1] RSPM (R 4.1.0)
## pkgbuild    1.2.0 2020-12-15 [1] RSPM (R 4.1.0)
## pkgconfig   2.0.3 2019-09-22 [1] RSPM (R 4.1.0)
## pkgload     1.2.1 2021-04-06 [1] RSPM (R 4.1.0)
## plotly      * 4.9.4.1 2021-06-18 [1] RSPM (R 4.0.5)
## plyr        * 1.8.6 2020-03-03 [1] RSPM (R 4.0.5)
## prettyunits 1.1.1 2020-01-24 [1] RSPM (R 4.1.0)
## processx    3.5.2 2021-04-30 [1] RSPM (R 4.1.0)
## ps          1.6.0 2021-02-28 [1] RSPM (R 4.1.0)
## purrr       0.3.4 2020-04-17 [1] RSPM (R 4.1.0)
## R6          2.5.0 2020-10-28 [1] RSPM (R 4.1.0)
## RColorBrewer * 1.1-2 2014-12-07 [1] RSPM (R 4.1.0)
## Rcpp        1.0.7 2021-07-07 [1] RSPM (R 4.1.0)
## readr       * 2.0.0 2021-07-20 [1] RSPM (R 4.0.5)
## readxl      * 1.3.1 2019-03-13 [1] RSPM (R 4.1.0)
## remotes     2.4.0 2021-06-02 [1] RSPM (R 4.1.0)
## reshape     0.8.8 2018-10-23 [1] RSPM (R 4.0.3)
## rio         0.5.27 2021-06-21 [1] RSPM (R 4.0.5)
## rlang       0.4.11 2021-04-30 [1] RSPM (R 4.1.0)
## rmarkdown   2.9 2021-06-15 [1] RSPM (R 4.1.0)
## ROCR        * 1.0-11 2020-05-02 [1] RSPM (R 4.0.0)
## rprojroot   2.0.2 2020-11-15 [1] RSPM (R 4.1.0)
## rstatix     0.7.0 2021-02-13 [1] RSPM (R 4.0.3)
## rstudioapi  0.13 2020-11-12 [1] RSPM (R 4.1.0)
## Rtsne       * 0.15 2018-11-10 [1] RSPM (R 4.0.5)
## rvest       1.0.1 2021-07-26 [1] RSPM (R 4.0.5)
## sass        0.4.0 2021-05-12 [1] RSPM (R 4.1.0)
## scales     1.1.1 2020-05-11 [1] RSPM (R 4.1.0)
## sessioninfo 1.1.1 2018-11-05 [1] RSPM (R 4.1.0)
## stringi     * 1.7.3 2021-07-16 [1] RSPM (R 4.0.5)
## stringr     * 1.4.0 2019-02-10 [1] RSPM (R 4.1.0)
## svglite     2.0.0 2021-02-20 [1] RSPM (R 4.0.5)
## systemfonts 1.0.2 2021-05-11 [1] RSPM (R 4.0.5)
## testthat    3.0.4 2021-07-01 [1] RSPM (R 4.1.0)
## tibble      * 3.1.3 2021-07-23 [1] RSPM (R 4.0.5)
## tidyr       * 1.1.3 2021-03-03 [1] RSPM (R 4.1.0)
## tidyselect  1.1.1 2021-04-30 [1] RSPM (R 4.1.0)
## tzdb        0.1.2 2021-07-20 [1] RSPM (R 4.0.5)
## usethis     2.0.1 2021-02-10 [1] RSPM (R 4.1.0)
## utf8        1.2.2 2021-07-24 [1] RSPM (R 4.0.5)
## vctr        0.3.8 2021-04-29 [1] RSPM (R 4.1.0)
## viridisLite 0.4.0 2021-04-13 [1] RSPM (R 4.1.0)
## webshot     0.5.2 2019-11-22 [1] RSPM (R 4.1.0)
```

```
## withr      2.4.2 2021-04-18 [1] RSPM (R 4.1.0)
## WriteXLS  * 6.3.0 2021-04-01 [1] RSPM (R 4.0.4)
## xfun      0.24 2021-06-15 [1] RSPM (R 4.1.0)
## xml2      1.3.2 2020-04-23 [1] RSPM (R 4.1.0)
## yaml      2.2.1 2020-02-01 [1] RSPM (R 4.1.0)
## zip       2.2.0 2021-05-31 [1] RSPM (R 4.1.0)
##
## [1] /usr/local/lib/R/site-library
## [2] /usr/local/lib/R/library
```



# Combining Plasma Extracellular Vesicle Let-7b-5p, miR-184 and Circulating miR-22-3p Levels for NSCLC Diagnosis and Drug Resistance Prediction

G. P. Vadla<sup>1</sup>, B. Daghat<sup>1</sup>, N. Patterson<sup>1</sup>, V. Ahmad<sup>1</sup>, G. Perez<sup>1\*</sup>, A. Garcia<sup>1\*</sup>, Y. Manjunath<sup>2</sup>, J.T. Kaifi<sup>2,3</sup>, G. Li<sup>2,3</sup>, and C.Y. Chabu<sup>1,2,3†</sup>

## Supplementary information 3. Full images of Western blots

Red dashlines denote the area presented in the main figures.

### Related to figure 1d

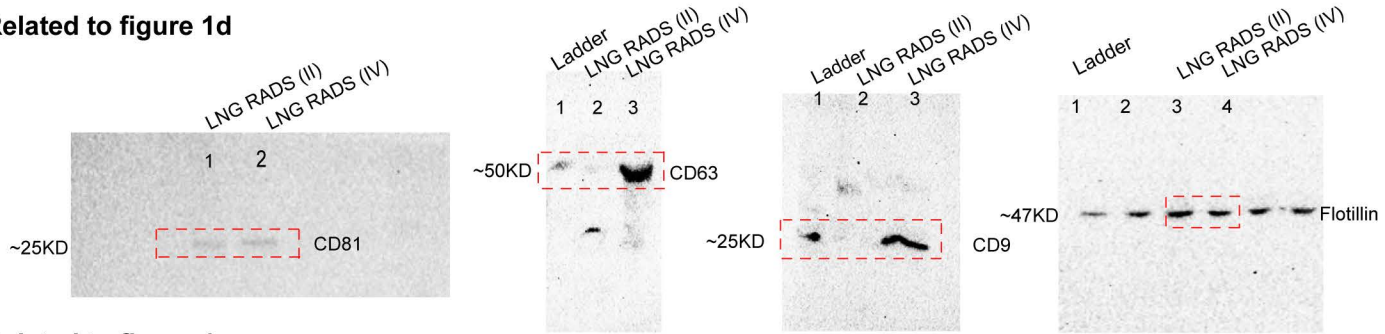

### Related to figure 1e

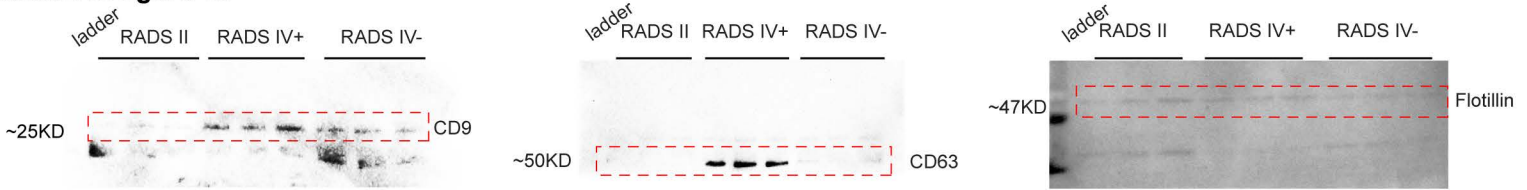

### Related to figure 3e

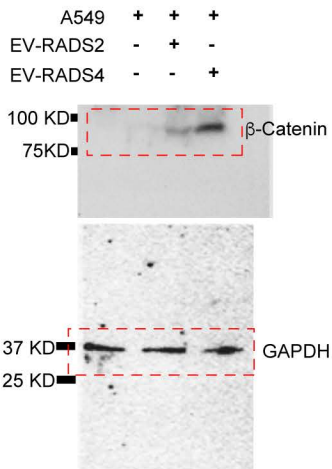

### Related to figure 3f

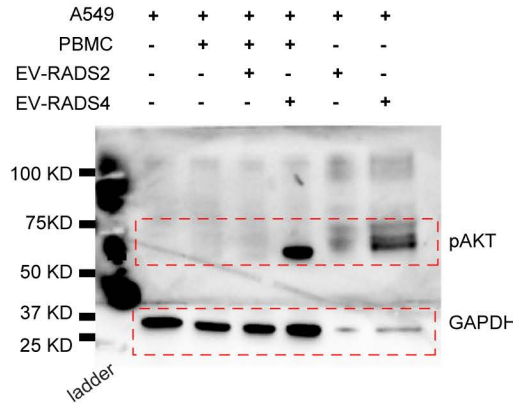

### Related to figure 3g

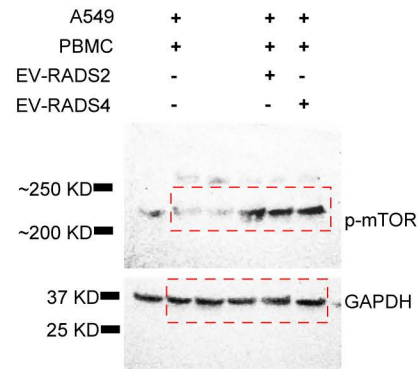

### Related to figure 3k

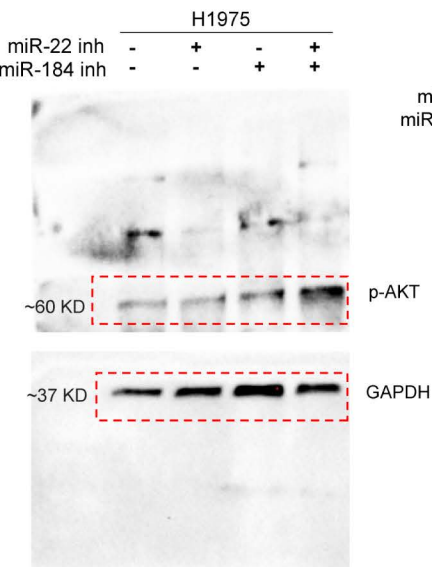

### Related to figure 3l

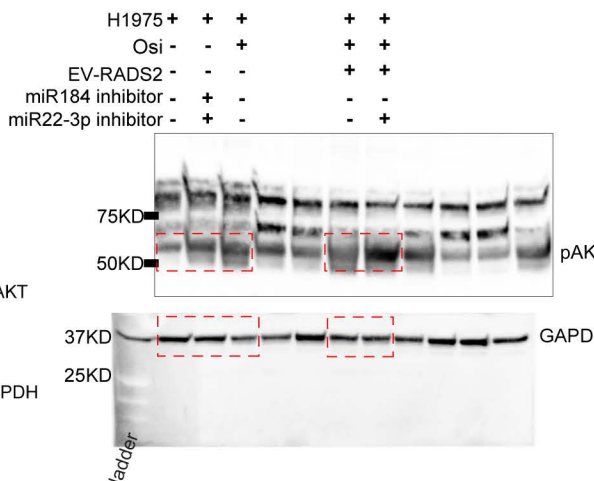

### Related to supplementary figure 3

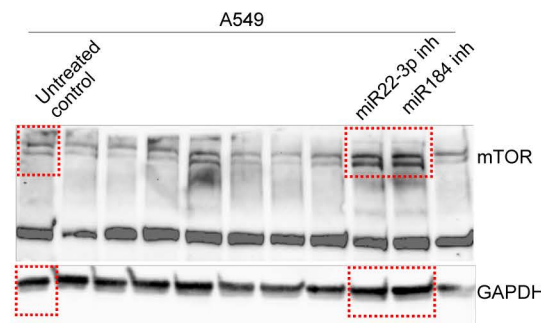

Supplement: 41598_2022_10598_MOESM1_ESM.pdf [file 41598_2022_10598_MOESM1_ESM.pdf]
