# Supplementary material for: Combining plasma extracellular vesicle Let-7b-5p, miR-184 and circulating miR-22-3p levels for NSCLC diagnosis and drug resistance prediction
Source: PubMed Central journal article supplement (PMC9035169; doi:10.1038/s41598-022-10598-x), 2022-04-23
Supplement: 41598_2022_10598_MOESM4_ESM.pdf [file 41598_2022_10598_MOESM4_ESM.pdf]

| <b>LEGEND</b> |                                  |
|---------------|----------------------------------|
| A (N=20)      | Screening control                |
| B (N=20)      | Initial RADS4 Diagnosis          |
| B1 (N=14)     | Confirmed cases                  |
| B2 (N=6)      | LNG-RADS4-False Positive         |
| C (N=5)       | Disease progression (LDCT/Death) |

| Source | miRNA           | logFC    | logCPM     | F          | P-value    | Comparisons | Implicated in cancer (PMIDs)                                                             |
|--------|-----------------|----------|------------|------------|------------|-------------|------------------------------------------------------------------------------------------|
| EV     | hsa-miR-10b-5p  | -0.593   | 17.225     | 6.986      | 0.012      | A vs B      | 32236623, 31798622, 30853516                                                             |
| EV     | hsa-let-7b-5p   | 0.611    | 16.706     | 4.538      | 0.039      | A vs B      | 33283713, 29017393, 33733556, 32300359, 30995921, 25611389                               |
| EV     | hsa-miR-26a-5p  | 0.545    | 15.337     | 3.966      | 0.053      | A vs B      | 34313719, 34149922, 34141617, 33898304, 33841514, 33795765, 33761638, 33744438, 33553298 |
| EV     | hsa-miR-184     | -1.79    | 13.17      | 10.43      | 0.00       | B1 vs B2    | 34328198, 34076278, 34055058, 34039407, 34000513, 33982217, 33816469, 33656787, 33354213 |
| EV     | hsa-miR-92b-3p  | -2.19    | 11.44      | 6.73       | 0.01       | B1 vs B2    | 34283053, 34136482, 34047469, 33984967, 33240410, 32864858, 32514152, 32256526, 31975504 |
| EV     | hsa-miR-574-5p  | -1.29    | 12.94      | 5.07       | 0.02       | B1 vs B2    | 34136389, 33989902, 33907569, 33869216, 33354213, 33317407, 33231826, 32832554, 32769887 |
| EV     | hsa-miR-203a-3p | -3.14    | 14.36      | 4.65       | 0.05       | B1 vs B2    | 34316330, 34147083, 33664577, 33504224, 33080572, 32806571, 32708601, 3267869, 332672054 |
| EV     | hsa-miR-122-5p  | 3.899287 | 12.2346089 | 26.0619736 | 7.9417E-06 | C vs A      | 34313924, 34053467, 33992764, 33760201, 33752480, 33738672, 33583123, 33531550, 33505957 |
| EV     | hsa-miR-200c-3p | 5.125889 | 9.91150971 | 20.6179926 | 1.2535E-05 | C vs A      | 34315420, 34259142, 34257614, 34071861, 34067060, 33911091, 33504224, 33465676, 33174523 |
| EV     | hsa-miR-31-5p   | -5.44366 | 10.5156451 | 11.2580472 | 0.00105829 | C vs A      | 34201353, 34082869, 34074322, 33867838, 33682215, 33531839, 33526040, 33510047, 33370717 |
| EV     | hsa-miR-100-5p  | -4.88756 | 10.1486038 | 9.14525193 | 0.00301642 | C vs A      | 34218800, 34102608, 33948855, 33911091, 33504224, 33465676, 33335853, 32911741, 32767323 |
| EV     | hsa-miR-148a-3p | 2.146505 | 11.325399  | 9.04796255 | 0.00315259 | C vs A      | 34324740, 34288373, 34257725, 34098776, 34082012, 34021072, 34007215, 33959508, 33922968 |
| EV     | hsa-miR-378a-3p | 2.840503 | 9.80565516 | 8.21489885 | 0.00484017 | C vs A      | 34222341, 34113564, 33823894, 33766217, 33751805, 33634974, 33634097, 33578293, 33531456 |
| EV     | hsa-miR-192-5p  | 1.65028  | 12.3389158 | 7.85517362 | 0.00583524 | C vs A      | 34104082, 34042256, 33806966, 33735626, 33708127, 33256802, 33024199, 32914665, 32626956 |
| EV     | hsa-miR-363-3p  | -3.7842  | 10.2131451 | 6.66152515 | 0.01094898 | C vs A      | 34286520, 33950983, 33742335, 33640021, 33015780, 32779194, 32638620, 32561457, 32380791 |

|        |                 |          |            |            |            |           |                                                                                          |
|--------|-----------------|----------|------------|------------|------------|-----------|------------------------------------------------------------------------------------------|
| EV     | hsa-miR-4454    | -3.97105 | 9.66192374 | 6.48518854 | 0.01206807 | C vs A    | 34315950, 33003646, 32816024, 32422901, 32350057, 28571588, 28469417, 26576778           |
| EV     | hsa-miR-21-5p   | 1.196673 | 13.5532275 | 6.37311549 | 0.01277623 | C vs A    | 34336825, 34316687, 34295456, 34288551, 34288231, 34254453, 34249905, 34201504, 34101749 |
| EV     | hsa-miR-141-3p  | 2.440423 | 9.90951629 | 6.09247612 | 0.01486065 | C vs A    | 34136401, 34112774, 34086253, 33977869, 33866108, 33854632, 33845141, 33820555, 33784000 |
| EV     | hsa-miR-27a-5p  | -3.25124 | 9.42401734 | 4.82880742 | 0.02979586 | C vs A    | 34201504, 34160887, 34073426, 34007020, 33931086, 33675923, 33465676, 33161496, 32910366 |
| EV     | hsa-miR-4700-5p | -3.06506 | 9.34585606 | 4.72515738 | 0.03157331 | C vs A    | NA                                                                                       |
| EV     | hsa-miR-7155-5p | -3.40754 | 9.51460762 | 4.70024454 | 0.03201701 | C vs A    | 30128020                                                                                 |
| EV     | hsa-miR-127-3p  | -2.95369 | 9.32769432 | 4.49875803 | 0.03585731 | C vs A    | 34295456, 33744851, 33732019, 33734890, 33468140, 33155194, 32742197, 32703147, 32538067 |
| EV     | hsa-miR-29c-3p  | -2.83713 | 9.3066489  | 4.11911272 | 0.04448431 | C vs A    | 34199886, 34035375, 33887587, 33798549, 33569427, 33536761, 33391354, 33314669, 33261630 |
| EV     | hsa-miR-155-5p  | 1.38374  | 11.4926268 | 4.088312   | 0.04521116 | C vs A    | 34295456, 34277059, 34201504, 34192708, 34190442, 34131104, 34103994, 34024195, 33999777 |
| Plasma | hsa-miR-184     | -2.12128 | 8.81691171 | 7.05539364 | 0.01251046 | A vs C    | 34328198, 34076278, 34055058, 34039407, 34000513, 33982217, 33816469, 33656787, 33354213 |
| Plasma | hsa-miR-3976    | -4.91    | 7.33       | 14.11      | 0.001      | A vs B    | 27573701, 25388097                                                                       |
| Plasma | hsa-miR-423-5p  | 1.05     | 13.70      | 9.81       | 0.003      | A vs B    | 34283074, 34048164, 33924142, 33833530, 33505907                                         |
| Plasma | hsa-miR-4259    | -2.22    | 5.51       | 8.83       | 0.004      | A vs B    | NA                                                                                       |
| Plasma | hsa-miR-486-5p  | 0.83     | 19.85      | 8.25       | 0.007      | A vs B    | 34323695, 34199766, 34165171, 34094949, 33955505                                         |
| Plasma | hsa-miR-320a-3p | 0.76     | 13.51      | 7.55       | 0.007      | A vs B    | 30634628, 29803922, 32814878                                                             |
| Plasma | hsa-miR-185-5p  | 1.55     | 6.51       | 7.50       | 0.008      | A vs B    | 34280472, 34270733, 34205829, 34084747, 33962174, 33885171, 33858489, 33817236, 33734890 |
| Plasma | hsa-miR-598-3p  | -1.80    | 5.69       | 7.04       | 0.010      | A vs B    | 34069838, 27347136                                                                       |
| Plasma | hsa-miR-7-5p    | -1.42    | 7.47       | 6.76       | 0.011      | A vs B    | 33283713, 29017393, 33733556, 32300359, 30995921, 25611389                               |
| Plasma | hsa-miR-223-3p  | -1.59    | 6.46       | 6.25       | 0.015      | A vs B    | 34320033, 34237309, 34205829, 34149922, 33986876, 33750388                               |
| Plasma | hsa-miR-99a-5p  | 1.70     | 5.44       | 5.99       | 0.017      | A vs B    | 34200463, 34192880, 34038200, 33846533, 33575116                                         |
| Plasma | hsa-let-7b-5p   | 0.66     | 14.03      | 5.42       | 0.023      | A vs B    | 33283713, 29017393, 33733556, 32300359, 30995921, 25611389                               |
| Plasma | hsa-miR-16-5p   | -1.25    | 11.53      | 7.46       | 0.011      | B1 vs B2  | 34132358, 34101749, 33993193, 33975517, 33789312                                         |
| Plasma | hsa-miR-22-3p   | -0.89    | 11.01      | 6.27       | 0.017      | B1 vs B2  | 34320711, 34239562, 34036905, 34019487, 33974352                                         |
| Plasma | hsa-miR-425-5p  | -1.49    | 9.55       | 5.44       | 0.025      | B1 vs B2  | 34280472, 34204158, 33670246, 33633568, 33123581                                         |
| Plasma | hsa-miR-146a-5p | -0.65    | 10.02      | 3.16       | 0.083      | B1 vs B2  | 34293926, 34232111, 34073426, 34055487, 33948855                                         |
| Plasma | hsa-miR-92b-3p  | -0.65    | 10.09      | 2.96       | 0.094      | B1 vs B2  | 34283053, 34136482, 34047469, 33984967, 33240410, 32864858, 32514152, 32256526, 31975504 |
| Plasma | hsa-miR-423-5p  | -1.08    | 13.56      | 17.29      | 0.000      | AB2 vs B1 | 34283074, 34048164, 33924142, 33833530, 33505907                                         |
| Plasma | hsa-let-7b-5p   | -0.66    | 13.87      | 10.28      | 0.002      | AB2 vs B1 | 33283713, 29017393, 33733556, 32300359, 30995921, 25611389                               |

|        |                 |          |            |            |            |           |                                                                                          |
|--------|-----------------|----------|------------|------------|------------|-----------|------------------------------------------------------------------------------------------|
| Plasma | hsa-miR-22-3p   | 0.70     | 11.48      | 8.45       | 0.006      | AB2 vs B1 | 34320711, 34239562, 34036905, 34019487, 33974352                                         |
| Plasma | hsa-miR-320a-3p | -0.62    | 13.44      | 7.48       | 0.009      | AB2 vs B1 | 30634628, 29803922, 32814878                                                             |
| Plasma | hsa-miR-486-5p  | -0.63    | 19.75      | 7.30       | 0.010      | AB2 vs B1 | 34323695, 34199766, 34165171, 34094949, 33955505                                         |
| Plasma | hsa-let-7i-5p   | -0.43    | 12.21      | 6.14       | 0.017      | AB2 vs B1 | 34009009, 33806966, 33775245, 33537093, 32799221                                         |
| Plasma | hsa-miR-122-5p  | 1.48     | 12.06      | 5.02       | 0.031      | AB2 vs B1 | 34313924, 34053467, 33992764, 33760201, 33752480, 33738672, 33583123, 33531550, 33505957 |
| Plasma | hsa-miR-192-5p  | 3.46382  | 12.1063752 | 29.5907537 | 1.8992E-05 | A vs C    | 34104082, 34042256, 33806966, 33735626, 33708127, 33256802, 33024199, 32914665, 32626956 |
| Plasma | hsa-miR-148a-3p | 3.23502  | 11.7392659 | 29.3569297 | 1.9988E-05 | A vs C    | 34324740, 34288373, 34257725, 34098776, 34082012, 34021072, 34007215, 33959508, 33922968 |
| Plasma | hsa-miR-122-5p  | 3.331167 | 12.9334566 | 18.0407132 | 0.00033661 | A vs C    | 34313924, 34053467, 33992764, 33760201, 33752480, 33738672, 33583123, 33531550, 33505957 |
| Plasma | hsa-miR-423-5p  | 1.295447 | 13.5276312 | 10.2355684 | 0.00323341 | A vs C    | 34283074, 34048164, 33924142, 33833530, 33505907                                         |
| Plasma | hsa-miR-320a-3p | 1.145576 | 13.5353561 | 9.29090428 | 0.00475998 | A vs C    | 30634628, 29803922, 32814878                                                             |
| Plasma | hsa-miR-486-5p  | 0.819955 | 19.6941712 | 6.78175629 | 0.01416047 | A vs C    | 34323695, 34199766, 34165171, 34094949, 33955505                                         |
| Plasma | hsa-miR-451a    | -0.94834 | 12.7512907 | 6.05582553 | 0.01980453 | A vs C    | 34345270, 34333815, 34257614, 34199766, 34183927                                         |
| Plasma | hsa-miR-142-5p  | -0.71891 | 10.968385  | 5.82535735 | 0.02207851 | A vs C    | 34323174, 34321149, 34178135, 34163033, 34040437                                         |
| Plasma | hsa-miR-21-5p   | 0.633327 | 11.8878778 | 4.97194941 | 0.03335729 | A vs C    | 34336825, 34316687, 34295456, 34288551, 34288231, 34254453, 34249905, 34201504, 34101749 |
| Plasma | hsa-miR-143-3p  | 1.231633 | 8.70671219 | 4.29172087 | 0.04695037 | A vs C    | 34335889, 34322386, 34279157, 34202934, 34085707                                         |
| Plasma | hsa-let-7c-5p   | -1.71626 | 11.7255483 | 4.32640405 | 0.04952009 | A vs C    | 34308851, 34026328, 33910598, 33461652, 33376529                                         |

**Supplementary table 1. List of differentially expressed miRNAs from NGS analyses**  
Highlighted rows denote prioritized miRNAs that are significantly deregulated in at least two of the following groups comparisons: Lung-RADS2 versus Lung-RADS4; Lung-RADS4 false positive versus confirmed cancer patients; Lung-RADS2 combined with false-positive Lung-RADS4 patients versus confirmed cancer patients; any of the preceding groups versus patients who rapidly progressed (LDCT imaging). The last column shows PMID of prior reports implicating the corresponding miRNA in cancer biology.
