# Supplementary material for: Combining plasma extracellular vesicle Let-7b-5p, miR-184 and circulating miR-22-3p levels for NSCLC diagnosis and drug resistance prediction
Source: PubMed Central journal article supplement (PMC9035169; doi:10.1038/s41598-022-10598-x), 2022-04-23
Supplement: 41598_2022_10598_MOESM5_ESM.pdf [file 41598_2022_10598_MOESM5_ESM.pdf]

| Cut-point | Sensitivity% | 95% CI            | Specificity% | 95% CI            |
|-----------|--------------|-------------------|--------------|-------------------|
| > 0.08341 | 100,0        | 86,20% to 100,0%  | 9,091        | 0,4663% to 37,74% |
| > 0.1044  | 100,0        | 86,20% to 100,0%  | 18,18        | 3,231% to 47,70%  |
| > 0.1454  | 100,0        | 86,20% to 100,0%  | 27,27        | 9,746% to 56,56%  |
| > 0.1759  | 100,0        | 86,20% to 100,0%  | 36,36        | 15,17% to 64,62%  |
| > 0.2095  | 100,0        | 86,20% to 100,0%  | 45,45        | 21,27% to 71,99%  |
| > 0.2545  | 95,83        | 79,76% to 99,79%  | 45,45        | 21,27% to 71,99%  |
| > 0.2770  | 95,83        | 79,76% to 99,79%  | 54,55        | 28,01% to 78,73%  |
| > 0.2879  | 95,83        | 79,76% to 99,79%  | 63,64        | 35,38% to 84,83%  |
| > 0.3212  | 95,83        | 79,76% to 99,79%  | 72,73        | 43,44% to 90,25%  |
| > 0.3927  | 91,67        | 74,15% to 98,52%  | 72,73        | 43,44% to 90,25%  |
| > 0.4872  | 87,50        | 69,00% to 95,66%  | 72,73        | 43,44% to 90,25%  |
| > 0.5451  | 87,50        | 69,00% to 95,66%  | 81,82        | 52,30% to 96,77%  |
| > 0.5765  | 83,33        | 64,15% to 93,32%  | 81,82        | 52,30% to 96,77%  |
| > 0.6931  | 79,17        | 59,53% to 90,76%  | 81,82        | 52,30% to 96,77%  |
| > 0.7977  | 75,00        | 55,10% to 88,00%  | 81,82        | 52,30% to 96,77%  |
| > 0.8115  | 70,83        | 50,83% to 85,09%  | 81,82        | 52,30% to 96,77%  |
| > 0.8178  | 70,83        | 50,83% to 85,09%  | 90,91        | 62,26% to 99,53%  |
| > 0.8601  | 70,83        | 50,83% to 85,09%  | 100,0        | 74,12% to 100,0%  |
| > 0.9021  | 66,67        | 46,71% to 82,03%  | 100,0        | 74,12% to 100,0%  |
| > 0.9170  | 62,50        | 42,71% to 78,84%  | 100,0        | 74,12% to 100,0%  |
| > 0.9338  | 58,33        | 38,83% to 75,53%  | 100,0        | 74,12% to 100,0%  |
| > 0.9460  | 54,17        | 35,07% to 72,11%  | 100,0        | 74,12% to 100,0%  |
| > 0.9718  | 50,00        | 31,43% to 68,57%  | 100,0        | 74,12% to 100,0%  |
| > 0.9889  | 45,83        | 27,89% to 64,93%  | 100,0        | 74,12% to 100,0%  |
| > 0.9898  | 41,67        | 24,47% to 61,17%  | 100,0        | 74,12% to 100,0%  |
| > 0.9912  | 37,50        | 21,16% to 57,29%  | 100,0        | 74,12% to 100,0%  |
| > 0.9935  | 33,33        | 17,97% to 53,29%  | 100,0        | 74,12% to 100,0%  |
| > 0.9946  | 29,17        | 14,91% to 49,17%  | 100,0        | 74,12% to 100,0%  |
| > 0.9954  | 25,00        | 12,00% to 44,90%  | 100,0        | 74,12% to 100,0%  |
| > 0.9967  | 20,83        | 9,245% to 40,47%  | 100,0        | 74,12% to 100,0%  |
| > 0.9982  | 16,67        | 6,679% to 35,85%  | 100,0        | 74,12% to 100,0%  |
| > 0.9994  | 12,50        | 4,344% to 31,00%  | 100,0        | 74,12% to 100,0%  |
| > 0.9998  | 8,333        | 1,481% to 25,85%  | 100,0        | 74,12% to 100,0%  |
| > 0.9999  | 4,167        | 0,2137% to 20,24% | 100,0        | 74,12% to 100,0%  |

|                          |                 |
|--------------------------|-----------------|
| Area under the ROC curve |                 |
| Area                     | 0,9242          |
| Std. Error               | 0,04442         |
| 95% confidence interval  | 0,8372 to 1,000 |
| P value                  | <0,0001         |
| Data                     |                 |
| Controls (P (negative))  | 11              |
| Patients (P (positive))  | 24              |
| Missing Controls         | 0               |
| Missing Patients         | 2               |

**Supplementary table 2.** Parameters and summary of combined let-7b-5p, miR-184, and miR-22-3p receiver operating characteristic analyses. Cut-point, sensitivity, specificities, and 95% confidence interval values are presented.
