# Supplementary material for: Combining plasma extracellular vesicle Let-7b-5p, miR-184 and circulating miR-22-3p levels for NSCLC diagnosis and drug resistance prediction
Source: PubMed Central journal article supplement (PMC9035169; doi:10.1038/s41598-022-10598-x), 2022-04-23
Supplement: 41598_2022_10598_MOESM6_ESM.pdf [file 41598_2022_10598_MOESM6_ESM.pdf]

| miRNA         | Accession    | Target  | Target ID | Experiment                                       | Literature                 |
|---------------|--------------|---------|-----------|--------------------------------------------------|----------------------------|
| hsa-let-7b-5p | MIMAT0000063 | ABCF1   | 23        | CLASH                                            | 23622248                   |
| hsa-let-7b-5p | MIMAT0000063 | ABL1    | 25        | CLASH                                            | 23622248                   |
| hsa-let-7b-5p | MIMAT0000063 | ACACA   | 31        | CLASH//Proteomics                                | 18668040 23622248          |
| hsa-let-7b-5p | MIMAT0000063 | ASIC1   | 41        | CLASH                                            | 23622248                   |
| hsa-let-7b-5p | MIMAT0000063 | ACPP    | 55        | Proteomics                                       | 18668040                   |
| hsa-let-7b-5p | MIMAT0000063 | ACTA1   | 58        | PAR-CLIP                                         | 21572407                   |
| hsa-let-7b-5p | MIMAT0000063 | ACTB    | 60        | CLASH                                            | 23622248                   |
| hsa-let-7b-5p | MIMAT0000063 | ACTG1   | 71        | CLASH//Luciferase reporter assay//Reporter assay | 15131085 23622248          |
| hsa-let-7b-5p | MIMAT0000063 | ACTN4   | 81        | CLASH                                            | 23622248                   |
| hsa-let-7b-5p | MIMAT0000063 | ACVR1   | 90        | Luciferase reporter assay//Microarray//qRT-PCR   | 22995917                   |
| hsa-let-7b-5p | MIMAT0000063 | ADCY1   | 107       | CLASH                                            | 23622248                   |
| hsa-let-7b-5p | MIMAT0000063 | ADH5    | 128       | HITS-CLIP//PAR-CLIP                              | 23313552 26701625 27292025 |
| hsa-let-7b-5p | MIMAT0000063 | AGL     | 178       | Proteomics                                       | 18668040                   |
| hsa-let-7b-5p | MIMAT0000063 | JAG1    | 182       | CLASH                                            | 23622248                   |
| hsa-let-7b-5p | MIMAT0000063 | AHR     | 196       | PAR-CLIP                                         | 23592263                   |
| hsa-let-7b-5p | MIMAT0000063 | AK4     | 205       | PAR-CLIP                                         | 23446348 20371350          |
| hsa-let-7b-5p | MIMAT0000063 | AKT2    | 208       | Luciferase reporter assay//qRT-PCR//Western blot | 25288334                   |
| hsa-let-7b-5p | MIMAT0000063 | AMD1    | 262       | HITS-CLIP                                        | 23313552                   |
| hsa-let-7b-5p | MIMAT0000063 | AMPH    | 273       | CLASH                                            | 23622248                   |
| hsa-let-7b-5p | MIMAT0000063 | SLC25A4 | 291       | CLASH                                            | 23622248                   |
| hsa-let-7b-5p | MIMAT0000063 | BIRC5   | 332       | CLASH                                            | 23622248                   |
| hsa-let-7b-5p | MIMAT0000063 | APRT    | 353       | Proteomics                                       | 18668040                   |
| hsa-let-7b-5p | MIMAT0000063 | AQP6    | 363       | PAR-CLIP                                         | 27292025                   |
| hsa-let-7b-5p | MIMAT0000063 | AR      | 367       | CLASH                                            | 23622248                   |
| hsa-let-7b-5p | MIMAT0000063 | ARCN1   | 372       | Proteomics                                       | 18668040                   |
| hsa-let-7b-5p | MIMAT0000063 | RHOB    | 388       | Proteomics//pSILAC                               | 18668040                   |
| hsa-let-7b-5p | MIMAT0000063 | RHOG    | 391       | Proteomics//pSILAC                               | 18668040                   |
| hsa-let-7b-5p | MIMAT0000063 | ASNA1   | 439       | CLASH                                            | 23622248                   |

|               |              |          |     |                                                                                                                                                                   |                                              |
|---------------|--------------|----------|-----|-------------------------------------------------------------------------------------------------------------------------------------------------------------------|----------------------------------------------|
| hsa-let-7b-5p | MIMAT0000063 | ASPA     | 443 | CLASH                                                                                                                                                             | 23622248                                     |
| hsa-let-7b-5p | MIMAT0000063 | ATOX1    | 475 | CLASH                                                                                                                                                             | 23622248                                     |
| hsa-let-7b-5p | MIMAT0000063 | ATP1A1   | 476 | CLASH                                                                                                                                                             | 23622248                                     |
| hsa-let-7b-5p | MIMAT0000063 | ATP2A2   | 488 | CLASH//Proteomics                                                                                                                                                 | 18668040 23622248                            |
| hsa-let-7b-5p | MIMAT0000063 | ALDH7A1  | 501 | CLASH                                                                                                                                                             | 23622248                                     |
| hsa-let-7b-5p | MIMAT0000063 | ATP6V0A1 | 535 | Proteomics//pSILAC                                                                                                                                                | 18668040                                     |
| hsa-let-7b-5p | MIMAT0000063 | AUP1     | 550 | CLASH                                                                                                                                                             | 23622248                                     |
| hsa-let-7b-5p | MIMAT0000063 | BACH1    | 571 | PAR-CLIP                                                                                                                                                          | 20371350                                     |
| hsa-let-7b-5p | MIMAT0000063 | BCAT1    | 586 | CLASH                                                                                                                                                             | 23622248                                     |
| hsa-let-7b-5p | MIMAT0000063 | CCND1    | 595 | Annexin V-FITC//immunoblot//Immunoblot//Immunofluorescence//Luciferase reporter assay//Microarray//Northern blot//PAR-CLIP//qRT-PCR//Reporter assay//Western blot | 18379589 20133835 23806108 23592263 26701625 |
| hsa-let-7b-5p | MIMAT0000063 | BCL7A    | 605 | Microarray//qRT-PCR                                                                                                                                               | 18026111                                     |
| hsa-let-7b-5p | MIMAT0000063 | BFSP1    | 631 | CLASH                                                                                                                                                             | 23622248                                     |
| hsa-let-7b-5p | MIMAT0000063 | BGLAP    | 632 | Proteomics                                                                                                                                                        | 18668040                                     |
| hsa-let-7b-5p | MIMAT0000063 | PRDM1    | 639 | Immunohistochemistry//Luciferase reporter assay//qRT-PCR//Western blot                                                                                            | 20651244                                     |
| hsa-let-7b-5p | MIMAT0000063 | BMP7     | 655 | CLASH                                                                                                                                                             | 23622248                                     |
| hsa-let-7b-5p | MIMAT0000063 | POLR3D   | 661 | HITS-CLIP                                                                                                                                                         | 23313552                                     |
| hsa-let-7b-5p | MIMAT0000063 | BNIP3L   | 665 | CLASH                                                                                                                                                             | 23622248                                     |
| hsa-let-7b-5p | MIMAT0000063 | VP51     | 738 | Proteomics                                                                                                                                                        | 18668040                                     |
| hsa-let-7b-5p | MIMAT0000063 | CA12     | 771 | Proteomics                                                                                                                                                        | 18668040                                     |
| hsa-let-7b-5p | MIMAT0000063 | CALU     | 813 | PAR-CLIP                                                                                                                                                          | 20371350                                     |
| hsa-let-7b-5p | MIMAT0000063 | CAPG     | 822 | Proteomics//pSILAC                                                                                                                                                | 18668040                                     |
| hsa-let-7b-5p | MIMAT0000063 | CBFB     | 865 | Microarray                                                                                                                                                        | 17699775                                     |
| hsa-let-7b-5p | MIMAT0000063 | CCNA2    | 890 | Immunoblot//Immunofluorescence//Luciferase reporter assay//qRT-PCR                                                                                                | 18379589                                     |
| hsa-let-7b-5p | MIMAT0000063 | CCNB1    | 891 | CLASH                                                                                                                                                             | 23622248                                     |

|               |              |        |      |                                                                                    |                            |
|---------------|--------------|--------|------|------------------------------------------------------------------------------------|----------------------------|
| hsa-let-7b-5p | MIMAT0000063 | CCND2  | 894  | Immunohistochemistry//Luciferase reporter assay//qRT-PCR//QRT-PCR//Western blot    | 17699775 17942906 23482325 |
| hsa-let-7b-5p | MIMAT0000063 | CCND3  | 896  | CLASH                                                                              | 23622248                   |
| hsa-let-7b-5p | MIMAT0000063 | CCNF   | 899  | CLASH//Microarray                                                                  | 17699775 23622248          |
| hsa-let-7b-5p | MIMAT0000063 | CCNG1  | 900  | CLASH                                                                              | 23622248                   |
| hsa-let-7b-5p | MIMAT0000063 | CCNT2  | 905  | PAR-CLIP                                                                           | 21572407                   |
| hsa-let-7b-5p | MIMAT0000063 | ENTPD6 | 955  | CLASH                                                                              | 23622248                   |
| hsa-let-7b-5p | MIMAT0000063 | CD59   | 966  | PAR-CLIP                                                                           | 23446348 20371350          |
| hsa-let-7b-5p | MIMAT0000063 | CD81   | 975  | CLASH                                                                              | 23622248                   |
| hsa-let-7b-5p | MIMAT0000063 | CD151  | 977  | CLASH                                                                              | 23622248                   |
| hsa-let-7b-5p | MIMAT0000063 | CDC25A | 993  | Immunohistochemistry//Luciferase reporter assay//Microarray//qRT-PCR//Western blot | 19966857 17699775          |
| hsa-let-7b-5p | MIMAT0000063 | CDC34  | 997  | Immunoblot//Luciferase reporter assay//Microarray//qRT-PCR//Western blot           | 19126550 17699775 21252116 |
| hsa-let-7b-5p | MIMAT0000063 | CDK6   | 1021 | Luciferase reporter assay//Microarray//Western blot                                | 17699775                   |
| hsa-let-7b-5p | MIMAT0000063 | CDKN1A | 1026 | Immunoblot//Microarray//PAR-CLIP//qRT-PCR                                          | 21572407 25578966          |
| hsa-let-7b-5p | MIMAT0000063 | CDKN1B | 1027 | Immunoblot//Microarray//qRT-PCR                                                    | 25578966                   |
| hsa-let-7b-5p | MIMAT0000063 | CENPB  | 1059 | Proteomics                                                                         | 18668040                   |
| hsa-let-7b-5p | MIMAT0000063 | CHD1   | 1105 | Proteomics                                                                         | 18668040                   |
| hsa-let-7b-5p | MIMAT0000063 | CHD3   | 1107 | CLASH//Proteomics                                                                  | 18668040 23622248          |
| hsa-let-7b-5p | MIMAT0000063 | CHD4   | 1108 | CLASH//Proteomics                                                                  | 18668040 23622248          |
| hsa-let-7b-5p | MIMAT0000063 | CKB    | 1152 | CLASH                                                                              | 23622248                   |
| hsa-let-7b-5p | MIMAT0000063 | CKS2   | 1164 | CLASH                                                                              | 23622248                   |
| hsa-let-7b-5p | MIMAT0000063 | AP1S1  | 1174 | PAR-CLIP                                                                           | 23592263 26701625          |
| hsa-let-7b-5p | MIMAT0000063 | COL3A1 | 1281 | Luciferase reporter assay//Microarray//qRT-PCR                                     | 22995917                   |
| hsa-let-7b-5p | MIMAT0000063 | COL8A1 | 1295 | PAR-CLIP                                                                           | 23592263                   |

|               |              |         |      |                                                                      |                   |
|---------------|--------------|---------|------|----------------------------------------------------------------------|-------------------|
| hsa-let-7b-5p | MIMAT0000063 | COX6B1  | 1340 | HITS-CLIP                                                            | 23706177          |
| hsa-let-7b-5p | MIMAT0000063 | COX7B   | 1349 | Proteomics                                                           | 18668040          |
| hsa-let-7b-5p | MIMAT0000063 | CRKL    | 1399 | Proteomics                                                           | 18668040          |
| hsa-let-7b-5p | MIMAT0000063 | CRX     | 1406 | PAR-CLIP                                                             | 26701625          |
| hsa-let-7b-5p | MIMAT0000063 | CRY2    | 1408 | PAR-CLIP                                                             | 23592263 26701625 |
| hsa-let-7b-5p | MIMAT0000063 | CS      | 1431 | Proteomics                                                           | 18668040          |
| hsa-let-7b-5p | MIMAT0000063 | CSNK1D  | 1453 | Proteomics//pSILAC                                                   | 18668040          |
| hsa-let-7b-5p | MIMAT0000063 | CSNK2A1 | 1457 | CLASH                                                                | 23622248          |
| hsa-let-7b-5p | MIMAT0000063 | CTBP2   | 1488 | CLASH                                                                | 23622248          |
| hsa-let-7b-5p | MIMAT0000063 | CTPS1   | 1503 | HITS-CLIP//Proteomics                                                | 18668040 23313552 |
| hsa-let-7b-5p | MIMAT0000063 | CUX1    | 1523 | CLASH                                                                | 23622248          |
| hsa-let-7b-5p | MIMAT0000063 | CYP1A2  | 1544 | CLASH                                                                | 23622248          |
| hsa-let-7b-5p | MIMAT0000063 | CYP2J2  | 1573 | Luciferase reporter assay//qRT-PCR//Western blot                     | 22761738          |
| hsa-let-7b-5p | MIMAT0000063 | DCTD    | 1635 | CLASH                                                                | 23622248          |
| hsa-let-7b-5p | MIMAT0000063 | DHX9    | 1660 | CLASH                                                                | 23622248          |
| hsa-let-7b-5p | MIMAT0000063 | DDX10   | 1662 | Proteomics                                                           | 18668040          |
| hsa-let-7b-5p | MIMAT0000063 | DDFA    | 1676 | CLASH                                                                | 23622248          |
| hsa-let-7b-5p | MIMAT0000063 | TIMM8A  | 1678 | Proteomics                                                           | 18668040          |
| hsa-let-7b-5p | MIMAT0000063 | DIAPH1  | 1729 | CLASH//Proteomics                                                    | 18668040 23622248 |
| hsa-let-7b-5p | MIMAT0000063 | DLAT    | 1737 | Proteomics                                                           | 18668040          |
| hsa-let-7b-5p | MIMAT0000063 | DMD     | 1756 | Microarray                                                           | 17699775          |
| hsa-let-7b-5p | MIMAT0000063 | DNA2    | 1763 | PAR-CLIP                                                             | 23446348          |
| hsa-let-7b-5p | MIMAT0000063 | DNAH9   | 1770 | HITS-CLIP                                                            | 23706177          |
| hsa-let-7b-5p | MIMAT0000063 | DYNC1H1 | 1778 | CLASH                                                                | 23622248          |
| hsa-let-7b-5p | MIMAT0000063 | DRG2    | 1819 | Proteomics                                                           | 18668040          |
| hsa-let-7b-5p | MIMAT0000063 | ARID3A  | 1820 | Microarray//PAR-CLIP                                                 | 17699775 23592263 |
| hsa-let-7b-5p | MIMAT0000063 | RCAN1   | 1827 | Microarray                                                           | 17699775          |
| hsa-let-7b-5p | MIMAT0000063 | DSG2    | 1829 | Proteomics                                                           | 18668040          |
| hsa-let-7b-5p | MIMAT0000063 | DSP     | 1832 | CLASH//Proteomics//pSILAC                                            | 18668040 23622248 |
| hsa-let-7b-5p | MIMAT0000063 | DUSP1   | 1843 | PAR-CLIP                                                             | 21572407          |
| hsa-let-7b-5p | MIMAT0000063 | DVL3    | 1857 | PAR-CLIP                                                             | 23446348          |
| hsa-let-7b-5p | MIMAT0000063 | E2F2    | 1870 | Immunofluorescence//Luciferase reporter assay//qRT-PCR//Western blot | 27520092          |

|               |              |        |      |                       |                                     |
|---------------|--------------|--------|------|-----------------------|-------------------------------------|
| hsa-let-7b-5p | MIMAT0000063 | E2F3   | 1871 | CLASH                 | 23622248                            |
| hsa-let-7b-5p | MIMAT0000063 | E2F5   | 1875 | Microarray            | 17699775                            |
| hsa-let-7b-5p | MIMAT0000063 | E2F6   | 1876 | Microarray//PAR-CLIP  | 17699775 20371350                   |
| hsa-let-7b-5p | MIMAT0000063 | EDN1   | 1906 | PAR-CLIP              | 23592263                            |
| hsa-let-7b-5p | MIMAT0000063 | EEF1A1 | 1915 | CLASH                 | 23622248                            |
| hsa-let-7b-5p | MIMAT0000063 | EEF2   | 1938 | CLASH                 | 23622248                            |
| hsa-let-7b-5p | MIMAT0000063 | EIF4A1 | 1973 | Proteomics            | 18668040                            |
| hsa-let-7b-5p | MIMAT0000063 | EIF4A2 | 1974 | Proteomics            | 18668040                            |
| hsa-let-7b-5p | MIMAT0000063 | EIF4G2 | 1982 | PAR-CLIP//Proteomics  | 18668040 23592263 21572407 27292025 |
| hsa-let-7b-5p | MIMAT0000063 | ELK4   | 2005 | CLASH                 | 23622248                            |
| hsa-let-7b-5p | MIMAT0000063 | ENG    | 2022 | Proteomics            | 18668040                            |
| hsa-let-7b-5p | MIMAT0000063 | EP300  | 2033 | CLASH                 | 23622248                            |
| hsa-let-7b-5p | MIMAT0000063 | EPHA4  | 2043 | PAR-CLIP              | 21572407                            |
| hsa-let-7b-5p | MIMAT0000063 | ERCC1  | 2067 | CLASH                 | 23622248                            |
| hsa-let-7b-5p | MIMAT0000063 | ETFA   | 2108 | CLASH                 | 23622248                            |
| hsa-let-7b-5p | MIMAT0000063 | EZH2   | 2146 | qRT-PCR//Western blot | 25611389                            |
| hsa-let-7b-5p | MIMAT0000063 | F2     | 2147 | Proteomics            | 18668040                            |
| hsa-let-7b-5p | MIMAT0000063 | FANCD2 | 2177 | CLASH                 | 23622248                            |
| hsa-let-7b-5p | MIMAT0000063 | ACSL1  | 2180 | Proteomics            | 18668040                            |
| hsa-let-7b-5p | MIMAT0000063 | FEN1   | 2237 | CLASH                 | 23622248                            |
| hsa-let-7b-5p | MIMAT0000063 | FLII   | 2314 | CLASH                 | 23622248                            |
| hsa-let-7b-5p | MIMAT0000063 | FLNA   | 2316 | CLASH                 | 23622248                            |
| hsa-let-7b-5p | MIMAT0000063 | FMO4   | 2329 | HITS-CLIP             | 23824327                            |
| hsa-let-7b-5p | MIMAT0000063 | FPR1   | 2357 | HITS-CLIP             | 23313552                            |
| hsa-let-7b-5p | MIMAT0000063 | FXN    | 2395 | PAR-CLIP              | 23592263                            |
| hsa-let-7b-5p | MIMAT0000063 | GABPB1 | 2553 | HITS-CLIP//PAR-CLIP   | 23592263 23313552                   |
| hsa-let-7b-5p | MIMAT0000063 | GALNT2 | 2590 | Proteomics            | 18668040                            |
| hsa-let-7b-5p | MIMAT0000063 | GAPDH  | 2597 | CLASH                 | 23622248                            |
| hsa-let-7b-5p | MIMAT0000063 | GATA6  | 2627 | CLASH                 | 23622248                            |
| hsa-let-7b-5p | MIMAT0000063 | GATM   | 2628 | PAR-CLIP              | 26701625                            |
| hsa-let-7b-5p | MIMAT0000063 | NR6A1  | 2649 | PAR-CLIP              | 23592263                            |
| hsa-let-7b-5p | MIMAT0000063 | GLB1   | 2720 | Proteomics            | 18668040                            |
| hsa-let-7b-5p | MIMAT0000063 | GLO1   | 2739 | PAR-CLIP//Proteomics  | 18668040 23592263                   |
| hsa-let-7b-5p | MIMAT0000063 | GNAS   | 2778 | CLASH                 | 23622248                            |
| hsa-let-7b-5p | MIMAT0000063 | GNB1   | 2782 | CLASH                 | 23622248                            |
| hsa-let-7b-5p | MIMAT0000063 | GNG5   | 2787 | PAR-CLIP              | 20371350 27292025                   |
| hsa-let-7b-5p | MIMAT0000063 | GOLGA4 | 2803 | PAR-CLIP              | 20371350                            |
| hsa-let-7b-5p | MIMAT0000063 | GPI    | 2821 | CLASH                 | 23622248                            |

|               |              |           |      |                                                                                                              |                                              |
|---------------|--------------|-----------|------|--------------------------------------------------------------------------------------------------------------|----------------------------------------------|
| hsa-let-7b-5p | MIMAT0000063 | GPM6B     | 2824 | CLASH                                                                                                        | 23622248                                     |
| hsa-let-7b-5p | MIMAT0000063 | GPX7      | 2882 | Microarray                                                                                                   | 17699775                                     |
| hsa-let-7b-5p | MIMAT0000063 | GSK3A     | 2931 | CLASH                                                                                                        | 23622248                                     |
| hsa-let-7b-5p | MIMAT0000063 | GSPT1     | 2935 | Proteomics                                                                                                   | 18668040                                     |
| hsa-let-7b-5p | MIMAT0000063 | GSR       | 2936 | CLASH//Proteomics                                                                                            | 18668040 23622248                            |
| hsa-let-7b-5p | MIMAT0000063 | GTF2I     | 2969 | Microarray                                                                                                   | 17699775                                     |
| hsa-let-7b-5p | MIMAT0000063 | GTF3C1    | 2975 | CLASH                                                                                                        | 23622248                                     |
| hsa-let-7b-5p | MIMAT0000063 | GYG1      | 2992 | CLASH                                                                                                        | 23622248                                     |
| hsa-let-7b-5p | MIMAT0000063 | GYS1      | 2997 | Proteomics//pSILAC                                                                                           | 18668040                                     |
| hsa-let-7b-5p | MIMAT0000063 | GYS2      | 2998 | Proteomics                                                                                                   | 18668040                                     |
| hsa-let-7b-5p | MIMAT0000063 | HIST1H1C  | 3006 | CLASH                                                                                                        | 23622248                                     |
| hsa-let-7b-5p | MIMAT0000063 | HIST1H2BD | 3017 | PAR-CLIP                                                                                                     | 24398324 23446348                            |
| hsa-let-7b-5p | MIMAT0000063 | HADHA     | 3030 | CLASH                                                                                                        | 23622248                                     |
| hsa-let-7b-5p | MIMAT0000063 | HARS      | 3035 | CLASH                                                                                                        | 23622248                                     |
| hsa-let-7b-5p | MIMAT0000063 | HCFC1     | 3054 | CLASH                                                                                                        | 23622248                                     |
| hsa-let-7b-5p | MIMAT0000063 | HTT       | 3064 | CLASH                                                                                                        | 23622248                                     |
| hsa-let-7b-5p | MIMAT0000063 | HELLS     | 3070 | Proteomics                                                                                                   | 18668040                                     |
| hsa-let-7b-5p | MIMAT0000063 | HIF1A     | 3091 | CLASH                                                                                                        | 23622248                                     |
| hsa-let-7b-5p | MIMAT0000063 | HK1       | 3098 | CLASH                                                                                                        | 23622248                                     |
| hsa-let-7b-5p | MIMAT0000063 | HMGB1     | 3146 | CLASH                                                                                                        | 23622248                                     |
| hsa-let-7b-5p | MIMAT0000063 | HMGCS1    | 3157 | CLASH                                                                                                        | 23622248                                     |
| hsa-let-7b-5p | MIMAT0000063 | HMGA1     | 3159 | CLASH//HITS-CLIP//Luciferase reporter assay//Microarray//PAR-CLIP//Proteomics//pSILAC//qRT-PCR//Western blot | 18668040 23622248 23798998 23592263 23313552 |
| hsa-let-7b-5p | MIMAT0000063 | HNRNPF    | 3185 | CLASH                                                                                                        | 23622248                                     |
| hsa-let-7b-5p | MIMAT0000063 | HNRNPL    | 3191 | CLASH                                                                                                        | 23622248                                     |
| hsa-let-7b-5p | MIMAT0000063 | HOXD11    | 3237 | CLASH                                                                                                        | 23622248                                     |
| hsa-let-7b-5p | MIMAT0000063 | HRAS      | 3265 | Immunoblot//qRT-PCR//Western blot                                                                            | 21252116                                     |
| hsa-let-7b-5p | MIMAT0000063 | AGFG2     | 3268 | CLASH                                                                                                        | 23622248                                     |
| hsa-let-7b-5p | MIMAT0000063 | HES1      | 3280 | CLASH                                                                                                        | 23622248                                     |
| hsa-let-7b-5p | MIMAT0000063 | HSF2      | 3298 | CLASH                                                                                                        | 23622248                                     |
| hsa-let-7b-5p | MIMAT0000063 | HSPA1B    | 3304 | CLASH                                                                                                        | 23622248                                     |
| hsa-let-7b-5p | MIMAT0000063 | HSPA8     | 3312 | CLASH                                                                                                        | 23622248                                     |
| hsa-let-7b-5p | MIMAT0000063 | HSP90A A1 | 3320 | CLASH                                                                                                        | 23622248                                     |

|               |              |         |      |                                                                                 |                                              |
|---------------|--------------|---------|------|---------------------------------------------------------------------------------|----------------------------------------------|
| hsa-let-7b-5p | MIMAT0000063 | IGSF3   | 3321 | Proteomics                                                                      | 18668040                                     |
| hsa-let-7b-5p | MIMAT0000063 | IDI1    | 3422 | Proteomics                                                                      | 18668040                                     |
| hsa-let-7b-5p | MIMAT0000063 | IFNB1   | 3456 | ELISA//Luciferase reporter assay//qRT-PCR                                       | 20130213                                     |
| hsa-let-7b-5p | MIMAT0000063 | IFRD1   | 3475 | Proteomics//pSILAC                                                              | 18668040                                     |
| hsa-let-7b-5p | MIMAT0000063 | IGF1R   | 3480 | Immunohistochemistry//Luciferase reporter assay//PAR-CLIP//QRTPCR//Western blot | 23482325 23592263 24398324 23446348 21572407 |
| hsa-let-7b-5p | MIMAT0000063 | IGHMBP2 | 3508 | CLASH                                                                           | 23622248                                     |
| hsa-let-7b-5p | MIMAT0000063 | RBPJ    | 3516 | CLASH                                                                           | 23622248                                     |
| hsa-let-7b-5p | MIMAT0000063 | IL6R    | 3570 | PAR-CLIP                                                                        | 27292025                                     |
| hsa-let-7b-5p | MIMAT0000063 | CXCL8   | 3576 | PAR-CLIP                                                                        | 26701625                                     |
| hsa-let-7b-5p | MIMAT0000063 | IMPDH1  | 3614 | Proteomics                                                                      | 18668040                                     |
| hsa-let-7b-5p | MIMAT0000063 | IMPDH2  | 3615 | Proteomics                                                                      | 18668040                                     |
| hsa-let-7b-5p | MIMAT0000063 | INPPL1  | 3636 | Proteomics                                                                      | 18668040                                     |
| hsa-let-7b-5p | MIMAT0000063 | ITGA3   | 3675 | HITS-CLIP                                                                       | 23706177 23313552                            |
| hsa-let-7b-5p | MIMAT0000063 | ITGB5   | 3693 | CLASH                                                                           | 23622248                                     |
| hsa-let-7b-5p | MIMAT0000063 | KCNC4   | 3749 | CLASH                                                                           | 23622248                                     |
| hsa-let-7b-5p | MIMAT0000063 | KIF2A   | 3796 | Proteomics                                                                      | 18668040                                     |
| hsa-let-7b-5p | MIMAT0000063 | KIFC1   | 3833 | CLASH                                                                           | 23622248                                     |
| hsa-let-7b-5p | MIMAT0000063 | KPNA5   | 3841 | HITS-CLIP//PAR-CLIP                                                             | 24398324 23446348 21572407 20371350          |
| hsa-let-7b-5p | MIMAT0000063 | TNPO1   | 3842 | CLASH                                                                           | 23622248                                     |
| hsa-let-7b-5p | MIMAT0000063 | RPSA    | 3921 | CLASH                                                                           | 23622248                                     |
| hsa-let-7b-5p | MIMAT0000063 | LBR     | 3930 | Proteomics                                                                      | 18668040                                     |
| hsa-let-7b-5p | MIMAT0000063 | LDLR    | 3949 | Proteomics                                                                      | 18668040                                     |
| hsa-let-7b-5p | MIMAT0000063 | LPL     | 4023 | Proteomics                                                                      | 18668040                                     |
| hsa-let-7b-5p | MIMAT0000063 | LTA4H   | 4048 | CLASH                                                                           | 23622248                                     |
| hsa-let-7b-5p | MIMAT0000063 | LYN     | 4067 | PAR-CLIP                                                                        | 23592263                                     |
| hsa-let-7b-5p | MIMAT0000063 | MAB21L1 | 4081 | CLASH                                                                           | 23622248                                     |
| hsa-let-7b-5p | MIMAT0000063 | MXD1    | 4084 | PAR-CLIP                                                                        | 21572407                                     |
| hsa-let-7b-5p | MIMAT0000063 | MAGEA3  | 4102 | PAR-CLIP                                                                        | 27292025                                     |
| hsa-let-7b-5p | MIMAT0000063 | MAGEA6  | 4105 | PAR-CLIP                                                                        | 27292025                                     |
| hsa-let-7b-5p | MIMAT0000063 | MAGEA12 | 4111 | PAR-CLIP                                                                        | 27292025                                     |
| hsa-let-7b-5p | MIMAT0000063 | MAP4    | 4134 | CLASH                                                                           | 23622248                                     |
| hsa-let-7b-5p | MIMAT0000063 | MARS    | 4141 | Proteomics                                                                      | 18668040                                     |

|               |              |         |      |                     |                            |
|---------------|--------------|---------|------|---------------------|----------------------------|
| hsa-let-7b-5p | MIMAT0000063 | MCM4    | 4173 | CLASH               | 23622248                   |
| hsa-let-7b-5p | MIMAT0000063 | MCM7    | 4176 | CLASH               | 23622248                   |
| hsa-let-7b-5p | MIMAT0000063 | MDM4    | 4194 | CLASH//PAR-CLIP     | 23622248 23592263 24398324 |
| hsa-let-7b-5p | MIMAT0000063 | MEF2C   | 4208 | CLASH               | 23622248                   |
| hsa-let-7b-5p | MIMAT0000063 | MEF2D   | 4209 | PAR-CLIP            | 26701625                   |
| hsa-let-7b-5p | MIMAT0000063 | MEIS3P1 | 4213 | PAR-CLIP            | 23592263                   |
| hsa-let-7b-5p | MIMAT0000063 | CD99    | 4267 | CLASH               | 23622248                   |
| hsa-let-7b-5p | MIMAT0000063 | MIPEP   | 4285 | Proteomics          | 18668040                   |
| hsa-let-7b-5p | MIMAT0000063 | MLLT1   | 4298 | Proteomics//pSILAC  | 18668040                   |
| hsa-let-7b-5p | MIMAT0000063 | MOV10   | 4343 | CLASH               | 23622248                   |
| hsa-let-7b-5p | MIMAT0000063 | MPG     | 4350 | Proteomics          | 18668040                   |
| hsa-let-7b-5p | MIMAT0000063 | ABCC1   | 4363 | Proteomics          | 18668040                   |
| hsa-let-7b-5p | MIMAT0000063 | MSI1    | 4440 | CLASH               | 23622248                   |
| hsa-let-7b-5p | MIMAT0000063 | MSN     | 4478 | CLASH               | 23622248                   |
| hsa-let-7b-5p | MIMAT0000063 | ATP6    | 4508 | CLASH               | 23622248                   |
| hsa-let-7b-5p | MIMAT0000063 | COX1    | 4512 | CLASH               | 23622248                   |
| hsa-let-7b-5p | MIMAT0000063 | COX2    | 4513 | CLASH               | 23622248                   |
| hsa-let-7b-5p | MIMAT0000063 | COX3    | 4514 | CLASH               | 23622248                   |
| hsa-let-7b-5p | MIMAT0000063 | ND1     | 4535 | CLASH               | 23622248                   |
| hsa-let-7b-5p | MIMAT0000063 | ND2     | 4536 | CLASH               | 23622248                   |
| hsa-let-7b-5p | MIMAT0000063 | ND4     | 4538 | CLASH               | 23622248                   |
| hsa-let-7b-5p | MIMAT0000063 | ND4L    | 4539 | CLASH               | 23622248                   |
| hsa-let-7b-5p | MIMAT0000063 | ND5     | 4540 | CLASH               | 23622248                   |
| hsa-let-7b-5p | MIMAT0000063 | MTRR    | 4552 | Proteomics//pSILAC  | 18668040                   |
| hsa-let-7b-5p | MIMAT0000063 | MYC     | 4609 | CLASH//TRAP         | 23622248 24510096          |
| hsa-let-7b-5p | MIMAT0000063 | MYO1C   | 4641 | CLASH               | 23622248                   |
| hsa-let-7b-5p | MIMAT0000063 | MYO1E   | 4643 | Proteomics          | 18668040                   |
| hsa-let-7b-5p | MIMAT0000063 | NACA    | 4666 | CLASH               | 23622248                   |
| hsa-let-7b-5p | MIMAT0000063 | NAP1L1  | 4673 | HITS-CLIP           | 19536157                   |
| hsa-let-7b-5p | MIMAT0000063 | NDUFA10 | 4705 | CLASH               | 23622248                   |
| hsa-let-7b-5p | MIMAT0000063 | NEDD4   | 4734 | Proteomics//pSILAC  | 18668040                   |
| hsa-let-7b-5p | MIMAT0000063 | NFATC1  | 4772 | CLASH               | 23622248                   |
| hsa-let-7b-5p | MIMAT0000063 | NFATC3  | 4775 | CLASH               | 23622248                   |
| hsa-let-7b-5p | MIMAT0000063 | NFKBIA  | 4792 | CLASH               | 23622248                   |
| hsa-let-7b-5p | MIMAT0000063 | NME4    | 4833 | CLASH               | 23622248                   |
| hsa-let-7b-5p | MIMAT0000063 | CNOT2   | 4848 | CLASH               | 23622248                   |
| hsa-let-7b-5p | MIMAT0000063 | SLC11A2 | 4891 | HITS-CLIP//PAR-CLIP | 23592263 23313552          |



|               |              |          |      |                                                                      |                            |
|---------------|--------------|----------|------|----------------------------------------------------------------------|----------------------------|
| hsa-let-7b-5p | MIMAT0000063 | NRAS     | 4893 | Immunohistochemistry//Luciferase reporter assay//Proteomics//qRT-PCR | 17699775 19966857 18668040 |
| hsa-let-7b-5p | MIMAT0000063 | NRDC     | 4898 | CLASH                                                                | 23622248                   |
| hsa-let-7b-5p | MIMAT0000063 | NUCB2    | 4925 | PAR-CLIP                                                             | 23592263                   |
| hsa-let-7b-5p | MIMAT0000063 | NVL      | 4931 | Proteomics                                                           | 18668040                   |
| hsa-let-7b-5p | MIMAT0000063 | OPRL1    | 4987 | PAR-CLIP                                                             | 22012620                   |
| hsa-let-7b-5p | MIMAT0000063 | ORC4     | 5000 | Proteomics                                                           | 18668040                   |
| hsa-let-7b-5p | MIMAT0000063 | OXA1L    | 5018 | Proteomics                                                           | 18668040                   |
| hsa-let-7b-5p | MIMAT0000063 | PA2G4    | 5036 | CLASH                                                                | 23622248                   |
| hsa-let-7b-5p | MIMAT0000063 | PAFAH1B3 | 5050 | Proteomics                                                           | 18668040                   |
| hsa-let-7b-5p | MIMAT0000063 | PAFAH2   | 5051 | HITS-CLIP                                                            | 19536157                   |
| hsa-let-7b-5p | MIMAT0000063 | PAK1     | 5058 | CLASH                                                                | 23622248                   |
| hsa-let-7b-5p | MIMAT0000063 | PAX3     | 5077 | CLASH                                                                | 23622248                   |
| hsa-let-7b-5p | MIMAT0000063 | PBX2     | 5089 | PAR-CLIP                                                             | 26701625                   |
| hsa-let-7b-5p | MIMAT0000063 | PCBP2    | 5094 | CLASH                                                                | 23622248                   |
| hsa-let-7b-5p | MIMAT0000063 | PCCB     | 5096 | Proteomics                                                           | 18668040                   |
| hsa-let-7b-5p | MIMAT0000063 | PCYT1A   | 5130 | Proteomics                                                           | 18668040                   |
| hsa-let-7b-5p | MIMAT0000063 | PDGFB    | 5155 | PAR-CLIP                                                             | 27292025                   |
| hsa-let-7b-5p | MIMAT0000063 | PDGFRA   | 5156 | Luciferase reporter assay//Microarray//qRT-PCR                       | 17942906 22995917          |
| hsa-let-7b-5p | MIMAT0000063 | PDK1     | 5163 | Proteomics                                                           | 18668040                   |
| hsa-let-7b-5p | MIMAT0000063 | PER1     | 5187 | CLASH                                                                | 23622248                   |
| hsa-let-7b-5p | MIMAT0000063 | PEX6     | 5190 | CLASH                                                                | 23622248                   |
| hsa-let-7b-5p | MIMAT0000063 | PFKM     | 5213 | CLASH                                                                | 23622248                   |
| hsa-let-7b-5p | MIMAT0000063 | PFN1     | 5216 | CLASH                                                                | 23622248                   |
| hsa-let-7b-5p | MIMAT0000063 | PGM1     | 5236 | CLASH                                                                | 23622248                   |
| hsa-let-7b-5p | MIMAT0000063 | PGM3     | 5238 | Proteomics                                                           | 18668040                   |
| hsa-let-7b-5p | MIMAT0000063 | PHKA1    | 5255 | CLASH                                                                | 23622248                   |
| hsa-let-7b-5p | MIMAT0000063 | PLAGL2   | 5326 | Microarray//PAR-CLIP                                                 | 17699775 23592263 26701625 |
| hsa-let-7b-5p | MIMAT0000063 | PLCB3    | 5331 | Proteomics                                                           | 18668040                   |
| hsa-let-7b-5p | MIMAT0000063 | PLCG2    | 5336 | PAR-CLIP                                                             | 24398324 23446348          |
| hsa-let-7b-5p | MIMAT0000063 | PLK1     | 5347 | CLASH                                                                | 23622248                   |
| hsa-let-7b-5p | MIMAT0000063 | PMAIP1   | 5366 | PAR-CLIP                                                             | 23592263                   |
| hsa-let-7b-5p | MIMAT0000063 | Sep-04   | 5414 | Proteomics                                                           | 18668040                   |
| hsa-let-7b-5p | MIMAT0000063 | POLD2    | 5425 | Proteomics//pSILAC                                                   | 18668040                   |
| hsa-let-7b-5p | MIMAT0000063 | POLR2A   | 5430 | CLASH                                                                | 23622248                   |

|               |              |             |      |                      |                                     |
|---------------|--------------|-------------|------|----------------------|-------------------------------------|
| hsa-let-7b-5p | MIMAT0000063 | POLR2C      | 5432 | Proteomics//pSILAC   | 18668040                            |
| hsa-let-7b-5p | MIMAT0000063 | POLR2D      | 5433 | PAR-CLIP             | 23592263 21572407 26701625          |
| hsa-let-7b-5p | MIMAT0000063 | POLR2H      | 5437 | Proteomics           | 18668040                            |
| hsa-let-7b-5p | MIMAT0000063 | POLR2L      | 5441 | Proteomics           | 18668040                            |
| hsa-let-7b-5p | MIMAT0000063 | PPID        | 5481 | Proteomics           | 18668040                            |
| hsa-let-7b-5p | MIMAT0000063 | PPM1G       | 5496 | Proteomics           | 18668040                            |
| hsa-let-7b-5p | MIMAT0000063 | PPP1R7      | 5510 | Proteomics//pSILAC   | 18668040                            |
| hsa-let-7b-5p | MIMAT0000063 | PPP2R2A     | 5520 | CLASH//PAR-CLIP      | 23622248 23446348                   |
| hsa-let-7b-5p | MIMAT0000063 | PPP2R5E     | 5529 | CLASH                | 23622248                            |
| hsa-let-7b-5p | MIMAT0000063 | PRIM1       | 5557 | Proteomics//pSILAC   | 18668040                            |
| hsa-let-7b-5p | MIMAT0000063 | PRIM2       | 5558 | HITS-CLIP            | 23706177                            |
| hsa-let-7b-5p | MIMAT0000063 | PRKAA2      | 5563 | CLASH                | 23622248                            |
| hsa-let-7b-5p | MIMAT0000063 | PRKAR2<br>A | 5576 | Proteomics           | 18668040                            |
| hsa-let-7b-5p | MIMAT0000063 | PRKD1       | 5587 | CLASH                | 23622248                            |
| hsa-let-7b-5p | MIMAT0000063 | MAPK1       | 5594 | CLASH                | 23622248                            |
| hsa-let-7b-5p | MIMAT0000063 | MAPK6       | 5597 | PAR-CLIP             | 21572407                            |
| hsa-let-7b-5p | MIMAT0000063 | MAP2K2      | 5605 | Proteomics           | 18668040                            |
| hsa-let-7b-5p | MIMAT0000063 | MAP2K7      | 5609 | PAR-CLIP             | 23592263 26701625                   |
| hsa-let-7b-5p | MIMAT0000063 | PRPS1       | 5631 | Proteomics           | 18668040                            |
| hsa-let-7b-5p | MIMAT0000063 | PSMD9       | 5715 | Proteomics           | 18668040                            |
| hsa-let-7b-5p | MIMAT0000063 | PTGFRN      | 5738 | CLASH                | 23622248                            |
| hsa-let-7b-5p | MIMAT0000063 | PTGS2       | 5743 | Proteomics//pSILAC   | 18668040                            |
| hsa-let-7b-5p | MIMAT0000063 | PVR         | 5817 | Proteomics           | 18668040                            |
| hsa-let-7b-5p | MIMAT0000063 | PCYT2       | 5833 | CLASH                | 23622248                            |
| hsa-let-7b-5p | MIMAT0000063 | QARS        | 5859 | Proteomics           | 18668040                            |
| hsa-let-7b-5p | MIMAT0000063 | QDPR        | 5860 | PAR-CLIP             | 23592263                            |
| hsa-let-7b-5p | MIMAT0000063 | RALB        | 5899 | CLASH                | 23622248                            |
| hsa-let-7b-5p | MIMAT0000063 | RBBP6       | 5930 | CLASH                | 23622248                            |
| hsa-let-7b-5p | MIMAT0000063 | RDX         | 5962 | PAR-CLIP//Proteomics | 18668040 23446348 21572407 26701625 |
| hsa-let-7b-5p | MIMAT0000063 | DPF2        | 5977 | Proteomics           | 18668040                            |
| hsa-let-7b-5p | MIMAT0000063 | RFC2        | 5982 | HITS-CLIP            | 23706177                            |
| hsa-let-7b-5p | MIMAT0000063 | RHD         | 6007 | HITS-CLIP//PAR-CLIP  | 23592263 23706177 23313552          |
| hsa-let-7b-5p | MIMAT0000063 | BRD2        | 6046 | CLASH                | 23622248                            |
| hsa-let-7b-5p | MIMAT0000063 | RPL12       | 6136 | CLASH                | 23622248                            |
| hsa-let-7b-5p | MIMAT0000063 | RPL18       | 6141 | CLASH                | 23622248                            |
| hsa-let-7b-5p | MIMAT0000063 | RPL18A      | 6142 | CLASH                | 23622248                            |
| hsa-let-7b-5p | MIMAT0000063 | MRPL12      | 6182 | PAR-CLIP             | 23592263                            |
| hsa-let-7b-5p | MIMAT0000063 | RPS4X       | 6191 | CLASH                | 23622248                            |

|               |              |         |      |                                  |                            |
|---------------|--------------|---------|------|----------------------------------|----------------------------|
| hsa-let-7b-5p | MIMAT0000063 | RPS24   | 6229 | CLASH                            | 23622248                   |
| hsa-let-7b-5p | MIMAT0000063 | RRAD    | 6236 | PAR-CLIP                         | 22012620                   |
| hsa-let-7b-5p | MIMAT0000063 | RRBP1   | 6238 | CLASH                            | 23622248                   |
| hsa-let-7b-5p | MIMAT0000063 | RRM1    | 6240 | PAR-CLIP                         | 23592263                   |
| hsa-let-7b-5p | MIMAT0000063 | RRM2    | 6241 | Microarray//PAR-CLIP//Proteomics | 17699775 18668040 21572407 |
| hsa-let-7b-5p | MIMAT0000063 | RXR8    | 6257 | CLASH                            | 23622248                   |
| hsa-let-7b-5p | MIMAT0000063 | SAFB    | 6294 | CLASH                            | 23622248                   |
| hsa-let-7b-5p | MIMAT0000063 | SALL2   | 6297 | CLASH                            | 23622248                   |
| hsa-let-7b-5p | MIMAT0000063 | SC5D    | 6309 | CLASH                            | 23622248                   |
| hsa-let-7b-5p | MIMAT0000063 | ATXN2   | 6311 | CLASH//HITS-CLIP                 | 23622248 23313552          |
| hsa-let-7b-5p | MIMAT0000063 | SCD     | 6319 | CLASH//Proteomics                | 18668040 23622248          |
| hsa-let-7b-5p | MIMAT0000063 | SEMG2   | 6407 | Proteomics                       | 18668040                   |
| hsa-let-7b-5p | MIMAT0000063 | SKI     | 6497 | CLASH                            | 23622248                   |
| hsa-let-7b-5p | MIMAT0000063 | SLC1A4  | 6509 | Proteomics//pSILAC               | 18668040                   |
| hsa-let-7b-5p | MIMAT0000063 | SLC20A1 | 6574 | PAR-CLIP                         | 23592263 20371350          |
| hsa-let-7b-5p | MIMAT0000063 | SLC25A1 | 6576 | Proteomics                       | 18668040                   |
| hsa-let-7b-5p | MIMAT0000063 | SMARCA1 | 6594 | Proteomics                       | 18668040                   |
| hsa-let-7b-5p | MIMAT0000063 | SMARCA4 | 6597 | CLASH//Proteomics                | 18668040 23622248          |
| hsa-let-7b-5p | MIMAT0000063 | SMARCB1 | 6598 | CLASH                            | 23622248                   |
| hsa-let-7b-5p | MIMAT0000063 | SMARCC1 | 6599 | Proteomics                       | 18668040                   |
| hsa-let-7b-5p | MIMAT0000063 | SMARCC2 | 6601 | CLASH                            | 23622248                   |
| hsa-let-7b-5p | MIMAT0000063 | SMARCD1 | 6602 | CLASH//Proteomics                | 18668040 23622248          |
| hsa-let-7b-5p | MIMAT0000063 | SUMO2   | 6613 | CLASH                            | 23622248                   |
| hsa-let-7b-5p | MIMAT0000063 | SNRPA   | 6626 | CLASH                            | 23622248                   |
| hsa-let-7b-5p | MIMAT0000063 | SNRPE   | 6635 | CLASH                            | 23622248                   |
| hsa-let-7b-5p | MIMAT0000063 | SOD2    | 6648 | PAR-CLIP                         | 22012620                   |
| hsa-let-7b-5p | MIMAT0000063 | SON     | 6651 | CLASH                            | 23622248                   |
| hsa-let-7b-5p | MIMAT0000063 | SOX9    | 6662 | Microarray                       | 17699775                   |
| hsa-let-7b-5p | MIMAT0000063 | SP1     | 6667 | CLASH                            | 23622248                   |
| hsa-let-7b-5p | MIMAT0000063 | SP100   | 6672 | Proteomics                       | 18668040                   |
| hsa-let-7b-5p | MIMAT0000063 | SPN     | 6693 | CLASH                            | 23622248                   |
| hsa-let-7b-5p | MIMAT0000063 | SPR     | 6697 | Proteomics                       | 18668040                   |
| hsa-let-7b-5p | MIMAT0000063 | SPTBN2  | 6712 | CLASH                            | 23622248                   |
| hsa-let-7b-5p | MIMAT0000063 | TROVE2  | 6738 | Proteomics                       | 18668040                   |
| hsa-let-7b-5p | MIMAT0000063 | SSR1    | 6745 | Microarray                       | 17699775                   |
| hsa-let-7b-5p | MIMAT0000063 | ST13    | 6767 | CLASH                            | 23622248                   |

|               |              |          |      |                                                                    |                   |
|---------------|--------------|----------|------|--------------------------------------------------------------------|-------------------|
| hsa-let-7b-5p | MIMAT0000063 | STAT2    | 6773 | HITS-CLIP                                                          | 23706177          |
| hsa-let-7b-5p | MIMAT0000063 | STIM1    | 6786 | Proteomics                                                         | 18668040          |
| hsa-let-7b-5p | MIMAT0000063 | STK4     | 6789 | PAR-CLIP                                                           | 23446348          |
| hsa-let-7b-5p | MIMAT0000063 | AURKA    | 6790 | Microarray//Proteomics                                             | 17699775 18668040 |
| hsa-let-7b-5p | MIMAT0000063 | STRN     | 6801 | PAR-CLIP                                                           | 24398324 20371350 |
| hsa-let-7b-5p | MIMAT0000063 | STX3     | 6809 | PAR-CLIP                                                           | 27292025          |
| hsa-let-7b-5p | MIMAT0000063 | SUOX     | 6821 | PAR-CLIP                                                           | 21572407          |
| hsa-let-7b-5p | MIMAT0000063 | SURF4    | 6836 | PAR-CLIP                                                           | 20371350          |
| hsa-let-7b-5p | MIMAT0000063 | SYT1     | 6857 | PAR-CLIP                                                           | 26701625          |
| hsa-let-7b-5p | MIMAT0000063 | TAF9     | 6880 | Proteomics                                                         | 18668040          |
| hsa-let-7b-5p | MIMAT0000063 | TCOF1    | 6949 | Proteomics                                                         | 18668040          |
| hsa-let-7b-5p | MIMAT0000063 | TGFBR1   | 7046 | ELISA//GFP reporter assay//Western blot                            | 24978044          |
| hsa-let-7b-5p | MIMAT0000063 | TGFBR3   | 7049 | PAR-CLIP                                                           | 21572407          |
| hsa-let-7b-5p | MIMAT0000063 | THBS1    | 7057 | PAR-CLIP//Proteomics//pSILAC                                       | 18668040 24398324 |
| hsa-let-7b-5p | MIMAT0000063 | TIAM1    | 7074 | CLASH                                                              | 23622248          |
| hsa-let-7b-5p | MIMAT0000063 | TJP1     | 7082 | CLASH                                                              | 23622248          |
| hsa-let-7b-5p | MIMAT0000063 | TLN1     | 7094 | CLASH                                                              | 23622248          |
| hsa-let-7b-5p | MIMAT0000063 | TLR4     | 7099 | Luciferase reporter assay                                          | 23437218          |
| hsa-let-7b-5p | MIMAT0000063 | NR2E1    | 7101 | immunoblot//Luciferase reporter assay//Northern blot//Western blot | 20133835          |
| hsa-let-7b-5p | MIMAT0000063 | TRAPPC10 | 7109 | PAR-CLIP                                                           | 26701625          |
| hsa-let-7b-5p | MIMAT0000063 | TPBG     | 7162 | Proteomics                                                         | 18668040          |
| hsa-let-7b-5p | MIMAT0000063 | TPD52L2  | 7165 | CLASH                                                              | 23622248          |
| hsa-let-7b-5p | MIMAT0000063 | TPM4     | 7171 | CLASH                                                              | 23622248          |
| hsa-let-7b-5p | MIMAT0000063 | TPP2     | 7174 | Proteomics                                                         | 18668040          |
| hsa-let-7b-5p | MIMAT0000063 | TPT1     | 7178 | CLASH                                                              | 23622248          |
| hsa-let-7b-5p | MIMAT0000063 | TST      | 7263 | Proteomics                                                         | 18668040          |
| hsa-let-7b-5p | MIMAT0000063 | TUBB2A   | 7280 | PAR-CLIP                                                           | 23592263          |
| hsa-let-7b-5p | MIMAT0000063 | TYMS     | 7298 | Proteomics//pSILAC                                                 | 18668040          |
| hsa-let-7b-5p | MIMAT0000063 | UBA1     | 7317 | CLASH                                                              | 23622248          |
| hsa-let-7b-5p | MIMAT0000063 | UBE2A    | 7319 | CLASH                                                              | 23622248          |
| hsa-let-7b-5p | MIMAT0000063 | UBE2D2   | 7322 | Proteomics                                                         | 18668040          |
| hsa-let-7b-5p | MIMAT0000063 | UBE2D3   | 7323 | Proteomics                                                         | 18668040          |
| hsa-let-7b-5p | MIMAT0000063 | UBE2I    | 7329 | Proteomics                                                         | 18668040          |
| hsa-let-7b-5p | MIMAT0000063 | SUMO1    | 7341 | PAR-CLIP                                                           | 24398324          |

|               |              |         |      |                                                                                                                  |                                                                |
|---------------|--------------|---------|------|------------------------------------------------------------------------------------------------------------------|----------------------------------------------------------------|
| hsa-let-7b-5p | MIMAT0000063 | UGT8    | 7368 | Proteomics//pSILAC                                                                                               | 18668040                                                       |
| hsa-let-7b-5p | MIMAT0000063 | UCK2    | 7371 | Proteomics                                                                                                       | 18668040                                                       |
| hsa-let-7b-5p | MIMAT0000063 | UTRN    | 7402 | CLASH                                                                                                            | 23622248                                                       |
| hsa-let-7b-5p | MIMAT0000063 | VCL     | 7414 | PAR-CLIP                                                                                                         | 23592263                                                       |
| hsa-let-7b-5p | MIMAT0000063 | YWHAE   | 7531 | CLASH                                                                                                            | 23622248                                                       |
| hsa-let-7b-5p | MIMAT0000063 | YWHAZ   | 7534 | CLASH//PAR-CLIP                                                                                                  | 23622248 23592263                                              |
| hsa-let-7b-5p | MIMAT0000063 | ZNF3    | 7551 | CLASH                                                                                                            | 23622248                                                       |
| hsa-let-7b-5p | MIMAT0000063 | ZNF8    | 7554 | PAR-CLIP                                                                                                         | 23592263                                                       |
| hsa-let-7b-5p | MIMAT0000063 | ZNF28   | 7576 | PAR-CLIP                                                                                                         | 23592263                                                       |
| hsa-let-7b-5p | MIMAT0000063 | ZNF148  | 7707 | CLASH                                                                                                            | 23622248                                                       |
| hsa-let-7b-5p | MIMAT0000063 | ZMYM2   | 7750 | CLASH                                                                                                            | 23622248                                                       |
| hsa-let-7b-5p | MIMAT0000063 | ZNF200  | 7752 | PAR-CLIP                                                                                                         | 21572407 20371350                                              |
| hsa-let-7b-5p | MIMAT0000063 | ZNF207  | 7756 | CLASH                                                                                                            | 23622248                                                       |
| hsa-let-7b-5p | MIMAT0000063 | SLC30A1 | 7779 | Proteomics                                                                                                       | 18668040                                                       |
| hsa-let-7b-5p | MIMAT0000063 | BTG2    | 7832 | CLASH                                                                                                            | 23622248                                                       |
| hsa-let-7b-5p | MIMAT0000063 | PXDN    | 7837 | Proteomics//pSILAC                                                                                               | 18668040                                                       |
| hsa-let-7b-5p | MIMAT0000063 | BRPF1   | 7862 | CLASH                                                                                                            | 23622248                                                       |
| hsa-let-7b-5p | MIMAT0000063 | PRRC2A  | 7916 | CLASH//Proteomics//pSILAC                                                                                        | 18668040 23622248                                              |
| hsa-let-7b-5p | MIMAT0000063 | BAG6    | 7917 | CLASH                                                                                                            | 23622248                                                       |
| hsa-let-7b-5p | MIMAT0000063 | ARHGEF5 | 7984 | CLASH                                                                                                            | 23622248                                                       |
| hsa-let-7b-5p | MIMAT0000063 | UBXN8   | 7993 | Proteomics                                                                                                       | 18668040                                                       |
| hsa-let-7b-5p | MIMAT0000063 | NUP214  | 8021 | CLASH//Proteomics                                                                                                | 18668040 23622248                                              |
| hsa-let-7b-5p | MIMAT0000063 | MLLT10  | 8028 | PAR-CLIP                                                                                                         | 23592263 27292025                                              |
| hsa-let-7b-5p | MIMAT0000063 | PDHX    | 8050 | Proteomics                                                                                                       | 18668040                                                       |
| hsa-let-7b-5p | MIMAT0000063 | PTP4A2  | 8073 | CLASH                                                                                                            | 23622248                                                       |
| hsa-let-7b-5p | MIMAT0000063 | KMT2D   | 8085 | PAR-CLIP                                                                                                         | 24398324 21572407                                              |
| hsa-let-7b-5p | MIMAT0000063 | HMGA2   | 8091 | HITS-CLIP//Immunohistochemistry//Luciferase reporter assay//Microarray//PAR-CLIP//qRT-PCR//QRT-PCR//Western blot | 17437991 23482325 23318420 20371350 21572407 25600877 26701625 |
| hsa-let-7b-5p | MIMAT0000063 | COIL    | 8161 | PAR-CLIP//Proteomics                                                                                             | 18668040 23446348 21572407 20371350                            |
| hsa-let-7b-5p | MIMAT0000063 | NCOA3   | 8202 | PAR-CLIP                                                                                                         | 24398324 26701625                                              |
| hsa-let-7b-5p | MIMAT0000063 | SMC1A   | 8243 | CLASH//PAR-CLIP                                                                                                  | 23622248 23446348 21572407 20371350 26701625                   |

|               |              |               |      |                                                                      |                   |
|---------------|--------------|---------------|------|----------------------------------------------------------------------|-------------------|
| hsa-let-7b-5p | MIMAT0000063 | NAA10         | 8260 | CLASH                                                                | 23622248          |
| hsa-let-7b-5p | MIMAT0000063 | SLC10A3       | 8273 | CLASH                                                                | 23622248          |
| hsa-let-7b-5p | MIMAT0000063 | FZD9          | 8326 | PAR-CLIP                                                             | 23446348 21572407 |
| hsa-let-7b-5p | MIMAT0000063 | HIST1H3<br>B  | 8358 | CLASH                                                                | 23622248          |
| hsa-let-7b-5p | MIMAT0000063 | DYRK3         | 8444 | PAR-CLIP                                                             | 26701625          |
| hsa-let-7b-5p | MIMAT0000063 | DHX16         | 8449 | Proteomics                                                           | 18668040          |
| hsa-let-7b-5p | MIMAT0000063 | CUL3          | 8452 | Proteomics                                                           | 18668040          |
| hsa-let-7b-5p | MIMAT0000063 | CUL2          | 8453 | CLASH                                                                | 23622248          |
| hsa-let-7b-5p | MIMAT0000063 | CUL1          | 8454 | Proteomics                                                           | 18668040          |
| hsa-let-7b-5p | MIMAT0000063 | IRS4          | 8471 | CLASH                                                                | 23622248          |
| hsa-let-7b-5p | MIMAT0000063 | DENR          | 8562 | CLASH                                                                | 23622248          |
| hsa-let-7b-5p | MIMAT0000063 | THOC5         | 8563 | CLASH                                                                | 23622248          |
| hsa-let-7b-5p | MIMAT0000063 | KHSRP         | 8570 | CLASH                                                                | 23622248          |
| hsa-let-7b-5p | MIMAT0000063 | NOP14         | 8602 | Proteomics                                                           | 18668040          |
| hsa-let-7b-5p | MIMAT0000063 | SLC25A1<br>2  | 8604 | Proteomics                                                           | 18668040          |
| hsa-let-7b-5p | MIMAT0000063 | USO1          | 8615 | Proteomics                                                           | 18668040          |
| hsa-let-7b-5p | MIMAT0000063 | RTCA          | 8634 | CLASH//Proteomics                                                    | 18668040 23622248 |
| hsa-let-7b-5p | MIMAT0000063 | SOCS1         | 8651 | PAR-CLIP                                                             | 23592263          |
| hsa-let-7b-5p | MIMAT0000063 | IRS2          | 8660 | CLASH//Flow//Luciferase<br>reporter assay//qRT-<br>PCR//Western blot | 23622248 24810113 |
| hsa-let-7b-5p | MIMAT0000063 | EIF3C         | 8663 | CLASH                                                                | 23622248          |
| hsa-let-7b-5p | MIMAT0000063 | EIF3D         | 8664 | CLASH                                                                | 23622248          |
| hsa-let-7b-5p | MIMAT0000063 | GBF1          | 8729 | CLASH                                                                | 23622248          |
| hsa-let-7b-5p | MIMAT0000063 | RNMT          | 8731 | Proteomics                                                           | 18668040          |
| hsa-let-7b-5p | MIMAT0000063 | TNFSF12       | 8742 | CLASH                                                                | 23622248          |
| hsa-let-7b-5p | MIMAT0000063 | TNFSF9        | 8744 | PAR-CLIP                                                             | 23592263 26701625 |
| hsa-let-7b-5p | MIMAT0000063 | SNAP23        | 8773 | Proteomics//pSILAC                                                   | 18668040          |
| hsa-let-7b-5p | MIMAT0000063 | RIOK3         | 8780 | CLASH                                                                | 23622248          |
| hsa-let-7b-5p | MIMAT0000063 | TNFRSF1<br>0B | 8795 | qRT-PCR//Western blot                                                | 24120475          |
| hsa-let-7b-5p | MIMAT0000063 | PEX11B        | 8799 | PAR-CLIP//Proteomics                                                 | 18668040 21572407 |
| hsa-let-7b-5p | MIMAT0000063 | TRIM24        | 8805 | CLASH//Proteomics                                                    | 18668040 23622248 |
| hsa-let-7b-5p | MIMAT0000063 | CCNK          | 8812 | Proteomics                                                           | 18668040          |
| hsa-let-7b-5p | MIMAT0000063 | SLC5A6        | 8884 | PAR-CLIP                                                             | 24398324 21572407 |
| hsa-let-7b-5p | MIMAT0000063 | DDX18         | 8886 | CLASH                                                                | 23622248          |
| hsa-let-7b-5p | MIMAT0000063 | EIF2B3        | 8891 | Proteomics                                                           | 18668040          |
| hsa-let-7b-5p | MIMAT0000063 | CCNA1         | 8900 | Reporter assay                                                       | 18379589          |

|               |              |          |      |                              |                                              |
|---------------|--------------|----------|------|------------------------------|----------------------------------------------|
| hsa-let-7b-5p | MIMAT0000063 | MBD2     | 8932 | PAR-CLIP                     | 24398324 23446348 21572407 20371350          |
| hsa-let-7b-5p | MIMAT0000063 | WASF1    | 8936 | CLASH                        | 23622248                                     |
| hsa-let-7b-5p | MIMAT0000063 | WASL     | 8976 | CLASH//PAR-CLIP              | 23622248 22012620 21572407 20371350          |
| hsa-let-7b-5p | MIMAT0000063 | BAZ1B    | 9031 | CLASH//Proteomics            | 18668040 23622248                            |
| hsa-let-7b-5p | MIMAT0000063 | UBA3     | 9039 | Proteomics                   | 18668040                                     |
| hsa-let-7b-5p | MIMAT0000063 | UBE2M    | 9040 | Proteomics                   | 18668040                                     |
| hsa-let-7b-5p | MIMAT0000063 | MAP7     | 9053 | Proteomics                   | 18668040                                     |
| hsa-let-7b-5p | MIMAT0000063 | PAPSS1   | 9061 | Proteomics                   | 18668040                                     |
| hsa-let-7b-5p | MIMAT0000063 | CLDN12   | 9069 | PAR-CLIP                     | 24398324 23446348 20371350 27292025          |
| hsa-let-7b-5p | MIMAT0000063 | USP14    | 9097 | CLASH                        | 23622248                                     |
| hsa-let-7b-5p | MIMAT0000063 | USP10    | 9100 | Proteomics                   | 18668040                                     |
| hsa-let-7b-5p | MIMAT0000063 | CCNB2    | 9133 | CLASH                        | 23622248                                     |
| hsa-let-7b-5p | MIMAT0000063 | ATG12    | 9140 | PAR-CLIP                     | 23592263                                     |
| hsa-let-7b-5p | MIMAT0000063 | SYNGR2   | 9144 | CLASH//Proteomics            | 18668040 23622248                            |
| hsa-let-7b-5p | MIMAT0000063 | HGS      | 9146 | CLASH                        | 23622248                                     |
| hsa-let-7b-5p | MIMAT0000063 | DDX21    | 9188 | Proteomics                   | 18668040                                     |
| hsa-let-7b-5p | MIMAT0000063 | DEDD     | 9191 | CLASH                        | 23622248                                     |
| hsa-let-7b-5p | MIMAT0000063 | AURKB    | 9212 | Proteomics//pSILAC           | 18668040                                     |
| hsa-let-7b-5p | MIMAT0000063 | TIAF1    | 9220 | PAR-CLIP                     | 26701625                                     |
| hsa-let-7b-5p | MIMAT0000063 | NOLC1    | 9221 | Proteomics                   | 18668040                                     |
| hsa-let-7b-5p | MIMAT0000063 | PTTG1    | 9232 | CLASH                        | 23622248                                     |
| hsa-let-7b-5p | MIMAT0000063 | TBRG4    | 9238 | Proteomics                   | 18668040                                     |
| hsa-let-7b-5p | MIMAT0000063 | MED14    | 9282 | CLASH                        | 23622248                                     |
| hsa-let-7b-5p | MIMAT0000063 | ADGRG1   | 9289 | Proteomics//pSILAC           | 18668040                                     |
| hsa-let-7b-5p | MIMAT0000063 | ATP6V1F  | 9296 | PAR-CLIP//Proteomics//pSILAC | 18668040 23592263 24398324 26701625 27292025 |
| hsa-let-7b-5p | MIMAT0000063 | COPS2    | 9318 | Proteomics                   | 18668040                                     |
| hsa-let-7b-5p | MIMAT0000063 | TRIP12   | 9320 | Proteomics                   | 18668040                                     |
| hsa-let-7b-5p | MIMAT0000063 | GTF3C4   | 9329 | Proteomics                   | 18668040                                     |
| hsa-let-7b-5p | MIMAT0000063 | VAMP3    | 9341 | Proteomics                   | 18668040                                     |
| hsa-let-7b-5p | MIMAT0000063 | SLC9A3R1 | 9368 | Proteomics                   | 18668040                                     |
| hsa-let-7b-5p | MIMAT0000063 | CIAO1    | 9391 | Proteomics//pSILAC           | 18668040                                     |
| hsa-let-7b-5p | MIMAT0000063 | FADS2    | 9415 | CLASH//Proteomics//pSILAC    | 18668040 23622248                            |
| hsa-let-7b-5p | MIMAT0000063 | HAND1    | 9421 | CLASH//PAR-CLIP              | 23622248 21572407                            |

|               |              |          |      |                             |                                              |
|---------------|--------------|----------|------|-----------------------------|----------------------------------------------|
| hsa-let-7b-5p | MIMAT0000063 | ZNF264   | 9422 | PAR-CLIP                    | 21572407                                     |
| hsa-let-7b-5p | MIMAT0000063 | QKI      | 9444 | CLASH                       | 23622248                                     |
| hsa-let-7b-5p | MIMAT0000063 | GGPS1    | 9453 | CLASH                       | 23622248                                     |
| hsa-let-7b-5p | MIMAT0000063 | PCYT1B   | 9468 | Proteomics                  | 18668040                                     |
| hsa-let-7b-5p | MIMAT0000063 | ONECUT2  | 9480 | PAR-CLIP                    | 23446348                                     |
| hsa-let-7b-5p | MIMAT0000063 | FXR2     | 9513 | CLASH                       | 23622248                                     |
| hsa-let-7b-5p | MIMAT0000063 | EEF1E1   | 9521 | Proteomics                  | 18668040                                     |
| hsa-let-7b-5p | MIMAT0000063 | SCAMP1   | 9522 | Proteomics                  | 18668040                                     |
| hsa-let-7b-5p | MIMAT0000063 | BAG5     | 9529 | Proteomics                  | 18668040                                     |
| hsa-let-7b-5p | MIMAT0000063 | ATP6V1G1 | 9550 | PAR-CLIP                    | 22100165 22291592 23446348                   |
| hsa-let-7b-5p | MIMAT0000063 | SOX13    | 9580 | CLASH                       | 23622248                                     |
| hsa-let-7b-5p | MIMAT0000063 | ENTPD4   | 9583 | CLASH                       | 23622248                                     |
| hsa-let-7b-5p | MIMAT0000063 | NCOR1    | 9611 | CLASH                       | 23622248                                     |
| hsa-let-7b-5p | MIMAT0000063 | NUP155   | 9631 | CLASH//PAR-CLIP//Proteomics | 18668040 23622248 23446348 21572407 20371350 |
| hsa-let-7b-5p | MIMAT0000063 | CLCA2    | 9635 | CLASH                       | 23622248                                     |
| hsa-let-7b-5p | MIMAT0000063 | SH3PXD2A | 9644 | CLASH                       | 23622248                                     |
| hsa-let-7b-5p | MIMAT0000063 | CTR9     | 9646 | CLASH                       | 23622248                                     |
| hsa-let-7b-5p | MIMAT0000063 | HS2ST1   | 9653 | Proteomics                  | 18668040                                     |
| hsa-let-7b-5p | MIMAT0000063 | CEP135   | 9662 | PAR-CLIP                    | 24398324                                     |
| hsa-let-7b-5p | MIMAT0000063 | KDM4A    | 9682 | CLASH                       | 23622248                                     |
| hsa-let-7b-5p | MIMAT0000063 | CLINT1   | 9685 | CLASH                       | 23622248                                     |
| hsa-let-7b-5p | MIMAT0000063 | BZW1     | 9689 | PAR-CLIP                    | 23592263 20371350 26701625                   |
| hsa-let-7b-5p | MIMAT0000063 | KIAA0391 | 9692 | PAR-CLIP                    | 21572407                                     |
| hsa-let-7b-5p | MIMAT0000063 | PUM1     | 9698 | CLASH//Proteomics           | 18668040 23622248                            |
| hsa-let-7b-5p | MIMAT0000063 | ESPL1    | 9700 | PAR-CLIP                    | 23446348 21572407                            |
| hsa-let-7b-5p | MIMAT0000063 | HERPUD1  | 9709 | HITS-CLIP//PAR-CLIP         | 23592263 23706177                            |
| hsa-let-7b-5p | MIMAT0000063 | EIF4A3   | 9775 | HITS-CLIP                   | 23706177                                     |
| hsa-let-7b-5p | MIMAT0000063 | SNX17    | 9784 | PAR-CLIP                    | 22291592                                     |
| hsa-let-7b-5p | MIMAT0000063 | SCRN1    | 9805 | Proteomics                  | 18668040                                     |
| hsa-let-7b-5p | MIMAT0000063 | IP6K1    | 9807 | CLASH                       | 23622248                                     |
| hsa-let-7b-5p | MIMAT0000063 | RNF40    | 9810 | Proteomics                  | 18668040                                     |
| hsa-let-7b-5p | MIMAT0000063 | KIAA0141 | 9812 | CLASH                       | 23622248                                     |
| hsa-let-7b-5p | MIMAT0000063 | EFCAB14  | 9813 | CLASH                       | 23622248                                     |
| hsa-let-7b-5p | MIMAT0000063 | TSC22D2  | 9819 | PAR-CLIP                    | 23592263 24398324                            |
| hsa-let-7b-5p | MIMAT0000063 | AREL1    | 9870 | PAR-CLIP                    | 23592263                                     |
| hsa-let-7b-5p | MIMAT0000063 | ZC3H11A  | 9877 | Proteomics                  | 18668040                                     |



|               |              |              |       |                              |                                         |
|---------------|--------------|--------------|-------|------------------------------|-----------------------------------------|
| hsa-let-7b-5p | MIMAT0000063 | POM121       | 9883  | CLASH//Proteomics//pSILAC    | 18668040 23622248                       |
| hsa-let-7b-5p | MIMAT0000063 | SMG7         | 9887  | CLASH                        | 23622248                                |
| hsa-let-7b-5p | MIMAT0000063 | UBAP2L       | 9898  | CLASH//Proteomics            | 18668040 23622248                       |
| hsa-let-7b-5p | MIMAT0000063 | RBM19        | 9904  | Proteomics//pSILAC           | 18668040                                |
| hsa-let-7b-5p | MIMAT0000063 | DENND4<br>B  | 9909  | CLASH                        | 23622248                                |
| hsa-let-7b-5p | MIMAT0000063 | NCAPD2       | 9918  | CLASH                        | 23622248                                |
| hsa-let-7b-5p | MIMAT0000063 | SEC16A       | 9919  | Proteomics                   | 18668040                                |
| hsa-let-7b-5p | MIMAT0000063 | ZBTB5        | 9925  | PAR-CLIP                     | 23592263 24398324 21572407 2037135<br>0 |
| hsa-let-7b-5p | MIMAT0000063 | LPGAT1       | 9926  | Proteomics                   | 18668040                                |
| hsa-let-7b-5p | MIMAT0000063 | USP15        | 9958  | Proteomics                   | 18668040                                |
| hsa-let-7b-5p | MIMAT0000063 | MED13        | 9969  | CLASH                        | 23622248                                |
| hsa-let-7b-5p | MIMAT0000063 | NUP153       | 9972  | CLASH                        | 23622248                                |
| hsa-let-7b-5p | MIMAT0000063 | HNRNPD<br>L  | 9987  | qRT-PCR                      | 17942906                                |
| hsa-let-7b-5p | MIMAT0000063 | CHAF1A       | 10036 | Proteomics                   | 18668040                                |
| hsa-let-7b-5p | MIMAT0000063 | SCAMP3       | 10067 | qRT-PCR                      | 17942906                                |
| hsa-let-7b-5p | MIMAT0000063 | HUWE1        | 10075 | CLASH                        | 23622248                                |
| hsa-let-7b-5p | MIMAT0000063 | TSPAN3       | 10099 | CLASH                        | 23622248                                |
| hsa-let-7b-5p | MIMAT0000063 | NUBP2        | 10101 | Proteomics                   | 18668040                                |
| hsa-let-7b-5p | MIMAT0000063 | RBM12        | 10137 | CLASH                        | 23622248                                |
| hsa-let-7b-5p | MIMAT0000063 | TRIM28       | 10155 | CLASH                        | 23622248                                |
| hsa-let-7b-5p | MIMAT0000063 | FARP1        | 10160 | Microarray                   | 17699775                                |
| hsa-let-7b-5p | MIMAT0000063 | LPCAT3       | 10162 | Proteomics                   | 18668040                                |
| hsa-let-7b-5p | MIMAT0000063 | SLC25A1<br>3 | 10165 | CLASH//Proteomics//pSILAC    | 18668040 23622248                       |
| hsa-let-7b-5p | MIMAT0000063 | ALG3         | 10195 | Proteomics//pSILAC           | 18668040                                |
| hsa-let-7b-5p | MIMAT0000063 | PSME3        | 10197 | CLASH//Proteomics            | 18668040 23622248                       |
| hsa-let-7b-5p | MIMAT0000063 | NME6         | 10201 | Proteomics                   | 18668040                                |
| hsa-let-7b-5p | MIMAT0000063 | GDF11        | 10220 | CLASH                        | 23622248                                |
| hsa-let-7b-5p | MIMAT0000063 | ZNF443       | 10224 | HITS-CLIP                    | 23313552                                |
| hsa-let-7b-5p | MIMAT0000063 | DCAF7        | 10238 | CLASH                        | 23622248                                |
| hsa-let-7b-5p | MIMAT0000063 | CALCO2<br>O2 | 10241 | Proteomics//pSILAC           | 18668040                                |
| hsa-let-7b-5p | MIMAT0000063 | GPHN         | 10243 | CLASH                        | 23622248                                |
| hsa-let-7b-5p | MIMAT0000063 | AKAP8        | 10270 | PAR-CLIP//Proteomics//pSILAC | 18668040 21572407 20371350              |

|               |              |         |       |                                                                                                                |                                     |
|---------------|--------------|---------|-------|----------------------------------------------------------------------------------------------------------------|-------------------------------------|
| hsa-let-7b-5p | MIMAT0000063 | SIGMAR1 | 10280 | Microarray//Proteomics//pSILAC                                                                                 | 17699775 18668040                   |
| hsa-let-7b-5p | MIMAT0000063 | MARCH6  | 10299 | CLASH                                                                                                          | 23622248                            |
| hsa-let-7b-5p | MIMAT0000063 | AKR1A1  | 10327 | Proteomics                                                                                                     | 18668040                            |
| hsa-let-7b-5p | MIMAT0000063 | PCGF3   | 10336 | CLASH//PAR-CLIP                                                                                                | 23622248 23592263 23446348 20371350 |
| hsa-let-7b-5p | MIMAT0000063 | WARS2   | 10352 | Proteomics                                                                                                     | 18668040                            |
| hsa-let-7b-5p | MIMAT0000063 | TUBA1B  | 10376 | CLASH                                                                                                          | 23622248                            |
| hsa-let-7b-5p | MIMAT0000063 | TUBB4A  | 10382 | PAR-CLIP                                                                                                       | 26701625                            |
| hsa-let-7b-5p | MIMAT0000063 | SCML2   | 10389 | CLASH                                                                                                          | 23622248                            |
| hsa-let-7b-5p | MIMAT0000063 | DLC1    | 10395 | Microarray                                                                                                     | 17699775                            |
| hsa-let-7b-5p | MIMAT0000063 | NDRG1   | 10397 | CLASH                                                                                                          | 23622248                            |
| hsa-let-7b-5p | MIMAT0000063 | NSA2    | 10412 | Proteomics                                                                                                     | 18668040                            |
| hsa-let-7b-5p | MIMAT0000063 | YAP1    | 10413 | Microarray                                                                                                     | 17699775                            |
| hsa-let-7b-5p | MIMAT0000063 | CD2BP2  | 10421 | CLASH                                                                                                          | 23622248                            |
| hsa-let-7b-5p | MIMAT0000063 | CDIPT   | 10423 | Proteomics//pSILAC                                                                                             | 18668040                            |
| hsa-let-7b-5p | MIMAT0000063 | TUBGCP3 | 10426 | CLASH                                                                                                          | 23622248                            |
| hsa-let-7b-5p | MIMAT0000063 | ZER1    | 10444 | CLASH                                                                                                          | 23622248                            |
| hsa-let-7b-5p | MIMAT0000063 | SEC23B  | 10483 | Proteomics                                                                                                     | 18668040                            |
| hsa-let-7b-5p | MIMAT0000063 | LRRC41  | 10489 | CLASH                                                                                                          | 23622248                            |
| hsa-let-7b-5p | MIMAT0000063 | UNC13B  | 10497 | CLASH                                                                                                          | 23622248                            |
| hsa-let-7b-5p | MIMAT0000063 | DDX17   | 10521 | CLASH                                                                                                          | 23622248                            |
| hsa-let-7b-5p | MIMAT0000063 | IPO8    | 10526 | Proteomics                                                                                                     | 18668040                            |
| hsa-let-7b-5p | MIMAT0000063 | IPO7    | 10527 | CLASH                                                                                                          | 23622248                            |
| hsa-let-7b-5p | MIMAT0000063 | RPP38   | 10557 | Proteomics//pSILAC                                                                                             | 18668040                            |
| hsa-let-7b-5p | MIMAT0000063 | PRPF8   | 10594 | CLASH                                                                                                          | 23622248                            |
| hsa-let-7b-5p | MIMAT0000063 | PDLIM5  | 10611 | PAR-CLIP                                                                                                       | 26701625                            |
| hsa-let-7b-5p | MIMAT0000063 | TGOLN2  | 10618 | PAR-CLIP                                                                                                       | 20371350                            |
| hsa-let-7b-5p | MIMAT0000063 | ARID3B  | 10620 | CLASH//PAR-CLIP                                                                                                | 23622248 23446348 21572407 20371350 |
| hsa-let-7b-5p | MIMAT0000063 | POLR3G  | 10622 | CLASH                                                                                                          | 23622248                            |
| hsa-let-7b-5p | MIMAT0000063 | LEFTY1  | 10637 | PAR-CLIP                                                                                                       | 22012620                            |
| hsa-let-7b-5p | MIMAT0000063 | IGF2BP1 | 10642 | Immunoblot//Immunofluorescence//Luciferase reporter assay//PAR-CLIP//Proteomics//pSILAC//qRT-PCR//Western blot | 18668040 21252116 21572407 23824794 |
| hsa-let-7b-5p | MIMAT0000063 | IGF2BP3 | 10643 | PAR-CLIP//Proteomics                                                                                           | 18668040 21572407 20371350          |

|               |              |          |       |                                                                                           |                   |
|---------------|--------------|----------|-------|-------------------------------------------------------------------------------------------|-------------------|
| hsa-let-7b-5p | MIMAT0000063 | IGF2BP2  | 10644 | Immunohistochemistry//Luciferase reporter assay//Proteomics//pSILAC//QRTPCR//Western blot | 18668040 23482325 |
| hsa-let-7b-5p | MIMAT0000063 | CELF1    | 10658 | PAR-CLIP                                                                                  | 24398324          |
| hsa-let-7b-5p | MIMAT0000063 | CTCF     | 10664 | CLASH                                                                                     | 23622248          |
| hsa-let-7b-5p | MIMAT0000063 | SLC12A7  | 10723 | PAR-CLIP                                                                                  | 22291592          |
| hsa-let-7b-5p | MIMAT0000063 | RAI1     | 10743 | CLASH                                                                                     | 23622248          |
| hsa-let-7b-5p | MIMAT0000063 | KIF1C    | 10749 | CLASH                                                                                     | 23622248          |
| hsa-let-7b-5p | MIMAT0000063 | AHCYL1   | 10768 | CLASH                                                                                     | 23622248          |
| hsa-let-7b-5p | MIMAT0000063 | ARPP19   | 10776 | CLASH                                                                                     | 23622248          |
| hsa-let-7b-5p | MIMAT0000063 | WDR4     | 10785 | Proteomics                                                                                | 18668040          |
| hsa-let-7b-5p | MIMAT0000063 | ZNF460   | 10794 | PAR-CLIP                                                                                  | 21572407 20371350 |
| hsa-let-7b-5p | MIMAT0000063 | TUBGCP2  | 10844 | Proteomics                                                                                | 18668040          |
| hsa-let-7b-5p | MIMAT0000063 | CLPX     | 10845 | Proteomics                                                                                | 18668040          |
| hsa-let-7b-5p | MIMAT0000063 | SRCAP    | 10847 | CLASH                                                                                     | 23622248          |
| hsa-let-7b-5p | MIMAT0000063 | PGRMC1   | 10857 | PAR-CLIP//Proteomics//pSILAC                                                              | 18668040 21572407 |
| hsa-let-7b-5p | MIMAT0000063 | WDR3     | 10885 | CLASH                                                                                     | 23622248          |
| hsa-let-7b-5p | MIMAT0000063 | RAB10    | 10890 | CLASH                                                                                     | 23622248          |
| hsa-let-7b-5p | MIMAT0000063 | PPARGC1A | 10891 | CLASH                                                                                     | 23622248          |
| hsa-let-7b-5p | MIMAT0000063 | TXNL4A   | 10907 | CLASH                                                                                     | 23622248          |
| hsa-let-7b-5p | MIMAT0000063 | PAPOLA   | 10914 | CLASH                                                                                     | 23622248          |
| hsa-let-7b-5p | MIMAT0000063 | POP1     | 10940 | Proteomics                                                                                | 18668040          |
| hsa-let-7b-5p | MIMAT0000063 | KDELRL1  | 10945 | CLASH                                                                                     | 23622248          |
| hsa-let-7b-5p | MIMAT0000063 | LMAN2    | 10960 | CLASH                                                                                     | 23622248          |
| hsa-let-7b-5p | MIMAT0000063 | STIP1    | 10963 | CLASH                                                                                     | 23622248          |
| hsa-let-7b-5p | MIMAT0000063 | ASCC3    | 10973 | Proteomics                                                                                | 18668040          |
| hsa-let-7b-5p | MIMAT0000063 | GCN1     | 10985 | CLASH                                                                                     | 23622248          |
| hsa-let-7b-5p | MIMAT0000063 | SLC27A2  | 11001 | Proteomics                                                                                | 18668040          |
| hsa-let-7b-5p | MIMAT0000063 | ADRM1    | 11047 | CLASH                                                                                     | 23622248          |
| hsa-let-7b-5p | MIMAT0000063 | TMEM115  | 11070 | CLASH                                                                                     | 23622248          |
| hsa-let-7b-5p | MIMAT0000063 | HNRNPU1  | 11100 | CLASH                                                                                     | 23622248          |
| hsa-let-7b-5p | MIMAT0000063 | ATE1     | 11101 | CLASH                                                                                     | 23622248          |
| hsa-let-7b-5p | MIMAT0000063 | PRDM4    | 11108 | CLASH                                                                                     | 23622248          |
| hsa-let-7b-5p | MIMAT0000063 | LSM6     | 11157 | Proteomics                                                                                | 18668040          |

|               |              |             |       |                                                   |                            |
|---------------|--------------|-------------|-------|---------------------------------------------------|----------------------------|
| hsa-let-7b-5p | MIMAT0000063 | RABL2B      | 11158 | PAR-CLIP                                          | 23592263 26701625          |
| hsa-let-7b-5p | MIMAT0000063 | RABL2A      | 11159 | PAR-CLIP                                          | 23592263 26701625          |
| hsa-let-7b-5p | MIMAT0000063 | FSTL1       | 11167 | CLASH                                             | 23622248                   |
| hsa-let-7b-5p | MIMAT0000063 | BAZ2A       | 11176 | CLASH                                             | 23622248                   |
| hsa-let-7b-5p | MIMAT0000063 | BAZ1A       | 11177 | Proteomics                                        | 18668040                   |
| hsa-let-7b-5p | MIMAT0000063 | ABCB8       | 11194 | CLASH                                             | 23622248                   |
| hsa-let-7b-5p | MIMAT0000063 | SUPT16<br>H | 11198 | CLASH                                             | 23622248                   |
| hsa-let-7b-5p | MIMAT0000063 | DDX20       | 11218 | CLASH                                             | 23622248                   |
| hsa-let-7b-5p | MIMAT0000063 | PRAF2       | 11230 | CLASH                                             | 23622248                   |
| hsa-let-7b-5p | MIMAT0000063 | PDCD10      | 11235 | Proteomics                                        | 18668040                   |
| hsa-let-7b-5p | MIMAT0000063 | PMF1        | 11243 | Proteomics                                        | 18668040                   |
| hsa-let-7b-5p | MIMAT0000063 | DUSP12      | 11266 | Proteomics//pSILAC                                | 18668040                   |
| hsa-let-7b-5p | MIMAT0000063 | ATXN2L      | 11273 | CLASH                                             | 23622248                   |
| hsa-let-7b-5p | MIMAT0000063 | STK38       | 11329 | CLASH                                             | 23622248                   |
| hsa-let-7b-5p | MIMAT0000063 | IKZF3       | 22806 | HITS-CLIP//PAR-CLIP                               | 23446348 23706177          |
| hsa-let-7b-5p | MIMAT0000063 | COPG1       | 22820 | Proteomics                                        | 18668040                   |
| hsa-let-7b-5p | MIMAT0000063 | DNAJC8      | 22826 | CLASH                                             | 23622248                   |
| hsa-let-7b-5p | MIMAT0000063 | SCAF8       | 22828 | CLASH                                             | 23622248                   |
| hsa-let-7b-5p | MIMAT0000063 | ZNF652      | 22834 | CLASH                                             | 23622248                   |
| hsa-let-7b-5p | MIMAT0000063 | RNF44       | 22838 | PAR-CLIP                                          | 24398324 20371350 27292025 |
| hsa-let-7b-5p | MIMAT0000063 | ZNF507      | 22847 | CLASH                                             | 23622248                   |
| hsa-let-7b-5p | MIMAT0000063 | CPEB3       | 22849 | Luciferase reporter<br>assay//Microarray//qRT-PCR | 22995917                   |
| hsa-let-7b-5p | MIMAT0000063 | FNDC3A      | 22862 | PAR-CLIP//Proteomics//pSILAC                      | 18668040 23592263          |
| hsa-let-7b-5p | MIMAT0000063 | DZIP1       | 22873 | Microarray                                        | 17699775                   |
| hsa-let-7b-5p | MIMAT0000063 | BAHD1       | 22893 | CLASH                                             | 23622248                   |
| hsa-let-7b-5p | MIMAT0000063 | RPIA        | 22934 | Luciferase reporter<br>assay//Reporter assay      | 15131085                   |
| hsa-let-7b-5p | MIMAT0000063 | PDCD11      | 22984 | CLASH//Proteomics                                 | 18668040 23622248          |
| hsa-let-7b-5p | MIMAT0000063 | CNOT1       | 23019 | CLASH                                             | 23622248                   |
| hsa-let-7b-5p | MIMAT0000063 | RBM34       | 23029 | Proteomics                                        | 18668040                   |
| hsa-let-7b-5p | MIMAT0000063 | XPO7        | 23039 | Proteomics                                        | 18668040                   |
| hsa-let-7b-5p | MIMAT0000063 | SMG1        | 23049 | CLASH                                             | 23622248                   |
| hsa-let-7b-5p | MIMAT0000063 | ZNF609      | 23060 | PAR-CLIP                                          | 26701625                   |
| hsa-let-7b-5p | MIMAT0000063 | RRP1B       | 23076 | Proteomics//pSILAC                                | 18668040                   |
| hsa-let-7b-5p | MIMAT0000063 | VWA8        | 23078 | Proteomics                                        | 18668040                   |

|               |              |          |       |                     |                            |
|---------------|--------------|----------|-------|---------------------|----------------------------|
| hsa-let-7b-5p | MIMAT0000063 | PPRC1    | 23082 | CLASH               | 23622248                   |
| hsa-let-7b-5p | MIMAT0000063 | ERC1     | 23085 | Proteomics//pSILAC  | 18668040                   |
| hsa-let-7b-5p | MIMAT0000063 | PEG10    | 23089 | PAR-CLIP            | 20371350                   |
| hsa-let-7b-5p | MIMAT0000063 | ARHGAP26 | 23092 | CLASH               | 23622248                   |
| hsa-let-7b-5p | MIMAT0000063 | MCF2L2   | 23101 | HITS-CLIP//PAR-CLIP | 21572407 20371350 23706177 |
| hsa-let-7b-5p | MIMAT0000063 | TNRC6B   | 23112 | CLASH               | 23622248                   |
| hsa-let-7b-5p | MIMAT0000063 | TAB2     | 23118 | CLASH//Microarray   | 17699775 23622248          |
| hsa-let-7b-5p | MIMAT0000063 | PLXND1   | 23129 | PAR-CLIP            | 23592263                   |
| hsa-let-7b-5p | MIMAT0000063 | EPB41L3  | 23136 | CLASH               | 23622248                   |
| hsa-let-7b-5p | MIMAT0000063 | GGA3     | 23163 | PAR-CLIP            | 24398324                   |
| hsa-let-7b-5p | MIMAT0000063 | TLL12    | 23170 | Proteomics          | 18668040                   |
| hsa-let-7b-5p | MIMAT0000063 | ATG4B    | 23192 | Proteomics          | 18668040                   |
| hsa-let-7b-5p | MIMAT0000063 | PMPCA    | 23203 | PAR-CLIP            | 21572407 20371350          |
| hsa-let-7b-5p | MIMAT0000063 | ARL6IP1  | 23204 | CLASH               | 23622248                   |
| hsa-let-7b-5p | MIMAT0000063 | SYNE2    | 23224 | CLASH               | 23622248                   |
| hsa-let-7b-5p | MIMAT0000063 | PDS5A    | 23244 | CLASH               | 23622248                   |
| hsa-let-7b-5p | MIMAT0000063 | ADGRL2   | 23266 | CLASH               | 23622248                   |
| hsa-let-7b-5p | MIMAT0000063 | DNMBP    | 23268 | CLASH               | 23622248                   |
| hsa-let-7b-5p | MIMAT0000063 | CLUH     | 23277 | CLASH//Proteomics   | 18668040 23622248          |
| hsa-let-7b-5p | MIMAT0000063 | ICOSLG   | 23308 | PAR-CLIP            | 23592263                   |
| hsa-let-7b-5p | MIMAT0000063 | KIAA0930 | 23313 | PAR-CLIP            | 23592263                   |
| hsa-let-7b-5p | MIMAT0000063 | ZCCHC11  | 23318 | CLASH               | 23622248                   |
| hsa-let-7b-5p | MIMAT0000063 | USP22    | 23326 | CLASH               | 23622248                   |
| hsa-let-7b-5p | MIMAT0000063 | VPS39    | 23339 | Proteomics//pSILAC  | 18668040                   |
| hsa-let-7b-5p | MIMAT0000063 | SYNE1    | 23345 | Proteomics          | 18668040                   |
| hsa-let-7b-5p | MIMAT0000063 | ZNF629   | 23361 | CLASH               | 23622248                   |
| hsa-let-7b-5p | MIMAT0000063 | PSD3     | 23362 | CLASH               | 23622248                   |
| hsa-let-7b-5p | MIMAT0000063 | LARP1    | 23367 | CLASH               | 23622248                   |
| hsa-let-7b-5p | MIMAT0000063 | RRP8     | 23378 | Proteomics//pSILAC  | 18668040                   |
| hsa-let-7b-5p | MIMAT0000063 | AHCYL2   | 23382 | PAR-CLIP            | 23592263                   |
| hsa-let-7b-5p | MIMAT0000063 | ADNP     | 23394 | CLASH               | 23622248                   |
| hsa-let-7b-5p | MIMAT0000063 | DICER1   | 23405 | Immunoblot          | 18812516                   |
| hsa-let-7b-5p | MIMAT0000063 | SF3B1    | 23451 | CLASH               | 23622248                   |
| hsa-let-7b-5p | MIMAT0000063 | ABCB10   | 23456 | Proteomics          | 18668040                   |
| hsa-let-7b-5p | MIMAT0000063 | CBX6     | 23466 | CLASH               | 23622248                   |
| hsa-let-7b-5p | MIMAT0000063 | CBX5     | 23468 | CLASH//PAR-CLIP     | 23622248 21572407          |
| hsa-let-7b-5p | MIMAT0000063 | SEC11A   | 23478 | Proteomics          | 18668040                   |

|               |              |          |       |                                                |                                                                |
|---------------|--------------|----------|-------|------------------------------------------------|----------------------------------------------------------------|
| hsa-let-7b-5p | MIMAT0000063 | RBFOX2   | 23543 | CLASH//PAR-CLIP//Proteomics                    | 18668040 23622248 24398324 23446348 22012620 21572407 20371350 |
| hsa-let-7b-5p | MIMAT0000063 | CARHSP1  | 23589 | Proteomics//pSILAC                             | 18668040                                                       |
| hsa-let-7b-5p | MIMAT0000063 | ACOT9    | 23597 | PAR-CLIP                                       | 23592263 23446348                                              |
| hsa-let-7b-5p | MIMAT0000063 | MKRN2    | 23609 | Proteomics                                     | 18668040                                                       |
| hsa-let-7b-5p | MIMAT0000063 | KPNA6    | 23633 | CLASH                                          | 23622248                                                       |
| hsa-let-7b-5p | MIMAT0000063 | PLD3     | 23646 | PAR-CLIP                                       | 26701625                                                       |
| hsa-let-7b-5p | MIMAT0000063 | ARFIP2   | 23647 | Proteomics                                     | 18668040                                                       |
| hsa-let-7b-5p | MIMAT0000063 | PLXNB2   | 23654 | CLASH                                          | 23622248                                                       |
| hsa-let-7b-5p | MIMAT0000063 | TMEM2    | 23670 | Proteomics//pSILAC                             | 18668040                                                       |
| hsa-let-7b-5p | MIMAT0000063 | RAB38    | 23682 | Proteomics                                     | 18668040                                                       |
| hsa-let-7b-5p | MIMAT0000063 | IFIT5    | 24138 | Proteomics//pSILAC                             | 18668040                                                       |
| hsa-let-7b-5p | MIMAT0000063 | RAB3GAP2 | 25782 | Proteomics                                     | 18668040                                                       |
| hsa-let-7b-5p | MIMAT0000063 | CIZ1     | 25792 | CLASH                                          | 23622248                                                       |
| hsa-let-7b-5p | MIMAT0000063 | ARIH1    | 25820 | PAR-CLIP                                       | 21572407                                                       |
| hsa-let-7b-5p | MIMAT0000063 | NIPBL    | 25836 | Proteomics                                     | 18668040                                                       |
| hsa-let-7b-5p | MIMAT0000063 | YIPF3    | 25844 | CLASH                                          | 23622248                                                       |
| hsa-let-7b-5p | MIMAT0000063 | POLR1A   | 25885 | Proteomics                                     | 18668040                                                       |
| hsa-let-7b-5p | MIMAT0000063 | INTS7    | 25896 | HITS-CLIP//Proteomics                          | 18668040 23706177                                              |
| hsa-let-7b-5p | MIMAT0000063 | AHCTF1   | 25909 | Proteomics                                     | 18668040                                                       |
| hsa-let-7b-5p | MIMAT0000063 | GEMIN5   | 25929 | Proteomics                                     | 18668040                                                       |
| hsa-let-7b-5p | MIMAT0000063 | PTPN23   | 25930 | CLASH                                          | 23622248                                                       |
| hsa-let-7b-5p | MIMAT0000063 | VIRMA    | 25962 | CLASH                                          | 23622248                                                       |
| hsa-let-7b-5p | MIMAT0000063 | MMACHC   | 25974 | CLASH                                          | 23622248                                                       |
| hsa-let-7b-5p | MIMAT0000063 | RPAP1    | 26015 | CLASH                                          | 23622248                                                       |
| hsa-let-7b-5p | MIMAT0000063 | LRIG1    | 26018 | Luciferase reporter assay//Microarray//qRT-PCR | 22995917                                                       |
| hsa-let-7b-5p | MIMAT0000063 | PTCD1    | 26024 | Proteomics                                     | 18668040                                                       |
| hsa-let-7b-5p | MIMAT0000063 | IPCEF1   | 26034 | CLASH                                          | 23622248                                                       |
| hsa-let-7b-5p | MIMAT0000063 | PPP1R16B | 26051 | CLASH                                          | 23622248                                                       |
| hsa-let-7b-5p | MIMAT0000063 | DNM3     | 26052 | Proteomics                                     | 18668040                                                       |
| hsa-let-7b-5p | MIMAT0000063 | ANKRD17  | 26057 | CLASH                                          | 23622248                                                       |
| hsa-let-7b-5p | MIMAT0000063 | APPL1    | 26060 | CLASH                                          | 23622248                                                       |
| hsa-let-7b-5p | MIMAT0000063 | CHTOP    | 26097 | HITS-CLIP                                      | 23313552                                                       |
| hsa-let-7b-5p | MIMAT0000063 | SZRD1    | 26099 | CLASH                                          | 23622248                                                       |
| hsa-let-7b-5p | MIMAT0000063 | GAPVD1   | 26130 | Proteomics                                     | 18668040                                                       |

|               |              |         |       |                                                                                                                              |                            |
|---------------|--------------|---------|-------|------------------------------------------------------------------------------------------------------------------------------|----------------------------|
| hsa-let-7b-5p | MIMAT0000063 | SERBP1  | 26135 | CLASH                                                                                                                        | 23622248                   |
| hsa-let-7b-5p | MIMAT0000063 | TES     | 26136 | Proteomics                                                                                                                   | 18668040                   |
| hsa-let-7b-5p | MIMAT0000063 | INTS1   | 26173 | CLASH                                                                                                                        | 23622248                   |
| hsa-let-7b-5p | MIMAT0000063 | FBXW2   | 26190 | CLASH//PAR-CLIP                                                                                                              | 23622248 23446348 20371350 |
| hsa-let-7b-5p | MIMAT0000063 | MYCBP   | 26292 | Proteomics                                                                                                                   | 18668040                   |
| hsa-let-7b-5p | MIMAT0000063 | CNNM3   | 26505 | CLASH                                                                                                                        | 23622248                   |
| hsa-let-7b-5p | MIMAT0000063 | TIMM9   | 26520 | Proteomics                                                                                                                   | 18668040                   |
| hsa-let-7b-5p | MIMAT0000063 | AGO1    | 26523 | CLASH//Immunohistochemistry/<br>/Immunoprecipitaion//Luciferase<br>e reporter assay//Northern<br>blot//qRT-PCR//Western blot | 23622248 23426184          |
| hsa-let-7b-5p | MIMAT0000063 | AATF    | 26574 | CLASH                                                                                                                        | 23622248                   |
| hsa-let-7b-5p | MIMAT0000063 | CKAP2   | 26586 | CLASH                                                                                                                        | 23622248                   |
| hsa-let-7b-5p | MIMAT0000063 | RANBP6  | 26953 | Proteomics                                                                                                                   | 18668040                   |
| hsa-let-7b-5p | MIMAT0000063 | AP3M1   | 26985 | CLASH                                                                                                                        | 23622248                   |
| hsa-let-7b-5p | MIMAT0000063 | PABPC1  | 26986 | CLASH                                                                                                                        | 23622248                   |
| hsa-let-7b-5p | MIMAT0000063 | TRUB2   | 26995 | Proteomics                                                                                                                   | 18668040                   |
| hsa-let-7b-5p | MIMAT0000063 | NPTN    | 27020 | CLASH                                                                                                                        | 23622248                   |
| hsa-let-7b-5p | MIMAT0000063 | VPS41   | 27072 | CLASH                                                                                                                        | 23622248                   |
| hsa-let-7b-5p | MIMAT0000063 | EIF2AK1 | 27102 | CLASH                                                                                                                        | 23622248                   |
| hsa-let-7b-5p | MIMAT0000063 | AFF4    | 27125 | CLASH                                                                                                                        | 23622248                   |
| hsa-let-7b-5p | MIMAT0000063 | PALD1   | 27143 | CLASH                                                                                                                        | 23622248                   |
| hsa-let-7b-5p | MIMAT0000063 | BRPF3   | 27154 | CLASH                                                                                                                        | 23622248                   |
| hsa-let-7b-5p | MIMAT0000063 | AGO2    | 27161 | CLASH                                                                                                                        | 23622248                   |
| hsa-let-7b-5p | MIMAT0000063 | SALL3   | 27164 | PAR-CLIP                                                                                                                     | 21572407                   |
| hsa-let-7b-5p | MIMAT0000063 | DISC1   | 27185 | PAR-CLIP                                                                                                                     | 23592263 26701625 27292025 |
| hsa-let-7b-5p | MIMAT0000063 | CHMP2A  | 27243 | Proteomics//pSILAC                                                                                                           | 18668040                   |
| hsa-let-7b-5p | MIMAT0000063 | RNF115  | 27246 | CLASH                                                                                                                        | 23622248                   |
| hsa-let-7b-5p | MIMAT0000063 | NFU1    | 27247 | CLASH                                                                                                                        | 23622248                   |
| hsa-let-7b-5p | MIMAT0000063 | TOX3    | 27324 | CLASH                                                                                                                        | 23622248                   |
| hsa-let-7b-5p | MIMAT0000063 | PRPF19  | 27339 | CLASH                                                                                                                        | 23622248                   |
| hsa-let-7b-5p | MIMAT0000063 | RRP7A   | 27341 | Proteomics                                                                                                                   | 18668040                   |
| hsa-let-7b-5p | MIMAT0000063 | POLL    | 27343 | PAR-CLIP                                                                                                                     | 26701625                   |
| hsa-let-7b-5p | MIMAT0000063 | MCAT    | 27349 | Proteomics                                                                                                                   | 18668040                   |
| hsa-let-7b-5p | MIMAT0000063 | MAT2B   | 27430 | Proteomics                                                                                                                   | 18668040                   |
| hsa-let-7b-5p | MIMAT0000063 | OSTM1   | 28962 | CLASH                                                                                                                        | 23622248                   |
| hsa-let-7b-5p | MIMAT0000063 | BZW2    | 28969 | Proteomics                                                                                                                   | 18668040                   |

|               |              |              |       |                                     |                                                  |
|---------------|--------------|--------------|-------|-------------------------------------|--------------------------------------------------|
| hsa-let-7b-5p | MIMAT0000063 | C19orf5<br>3 | 28974 | PAR-CLIP                            | 23592263 26701625                                |
| hsa-let-7b-5p | MIMAT0000063 | DBNL         | 28988 | CLASH                               | 23622248                                         |
| hsa-let-7b-5p | MIMAT0000063 | THYN1        | 29087 | PAR-CLIP                            | 20371350                                         |
| hsa-let-7b-5p | MIMAT0000063 | COMMD<br>9   | 29099 | Proteomics//pSILAC                  | 18668040                                         |
| hsa-let-7b-5p | MIMAT0000063 | UHRF1        | 29128 | Proteomics//pSILAC                  | 18668040                                         |
| hsa-let-7b-5p | MIMAT0000063 | ABT1         | 29777 | HITS-CLIP//PAR-CLIP                 | 23592263 24398324 21572407 2331355<br>2 27292025 |
| hsa-let-7b-5p | MIMAT0000063 | PARVB        | 29780 | Proteomics                          | 18668040                                         |
| hsa-let-7b-5p | MIMAT0000063 | CPSF1        | 29894 | Proteomics                          | 18668040                                         |
| hsa-let-7b-5p | MIMAT0000063 | SNX12        | 29934 | CLASH                               | 23622248                                         |
| hsa-let-7b-5p | MIMAT0000063 | SLC25A2<br>4 | 29957 | Proteomics//pSILAC                  | 18668040                                         |
| hsa-let-7b-5p | MIMAT0000063 | NOP53        | 29997 | Proteomics                          | 18668040                                         |
| hsa-let-7b-5p | MIMAT0000063 | ERO1A        | 30001 | PAR-CLIP//Proteomics                | 18668040 26701625                                |
| hsa-let-7b-5p | MIMAT0000063 | SOCS7        | 30837 | PAR-CLIP                            | 26701625                                         |
| hsa-let-7b-5p | MIMAT0000063 | EHD4         | 30844 | Proteomics                          | 18668040                                         |
| hsa-let-7b-5p | MIMAT0000063 | TMED5        | 50999 | HITS-CLIP//PAR-<br>CLIP//Proteomics | 18668040 23592263 24906430                       |
| hsa-let-7b-5p | MIMAT0000063 | TRNT1        | 51095 | Proteomics                          | 18668040                                         |
| hsa-let-7b-5p | MIMAT0000063 | SH3GLB1      | 51100 | Proteomics                          | 18668040                                         |
| hsa-let-7b-5p | MIMAT0000063 | LACTB2       | 51110 | CLASH                               | 23622248                                         |
| hsa-let-7b-5p | MIMAT0000063 | NAA20        | 51126 | CLASH//PAR-CLIP                     | 23622248 23592263                                |
| hsa-let-7b-5p | MIMAT0000063 | RNFT1        | 51136 | PAR-CLIP                            | 24398324                                         |
| hsa-let-7b-5p | MIMAT0000063 | VPS28        | 51160 | CLASH                               | 23622248                                         |
| hsa-let-7b-5p | MIMAT0000063 | PLEKHO<br>1  | 51177 | PAR-CLIP                            | 22291592 20371350                                |
| hsa-let-7b-5p | MIMAT0000063 | IPO11        | 51194 | CLASH                               | 23622248                                         |
| hsa-let-7b-5p | MIMAT0000063 | CPA4         | 51200 | HITS-CLIP                           | 23706177                                         |
| hsa-let-7b-5p | MIMAT0000063 | NUSAP1       | 51203 | CLASH                               | 23622248                                         |
| hsa-let-7b-5p | MIMAT0000063 | HGH1         | 51236 | pSILAC                              | 18668040                                         |
| hsa-let-7b-5p | MIMAT0000063 | MRPL37       | 51253 | CLASH                               | 23622248                                         |
| hsa-let-7b-5p | MIMAT0000063 | C1RL         | 51279 | PAR-CLIP                            | 23592263                                         |
| hsa-let-7b-5p | MIMAT0000063 | ERGIC2       | 51290 | Proteomics                          | 18668040                                         |
| hsa-let-7b-5p | MIMAT0000063 | THEM6        | 51337 | PAR-CLIP                            | 23592263 24398324                                |
| hsa-let-7b-5p | MIMAT0000063 | RWDD1        | 51389 | HITS-CLIP                           | 23824327                                         |
| hsa-let-7b-5p | MIMAT0000063 | DDX41        | 51428 | Proteomics                          | 18668040                                         |
| hsa-let-7b-5p | MIMAT0000063 | SFMBT1       | 51460 | CLASH                               | 23622248                                         |
| hsa-let-7b-5p | MIMAT0000063 | NCKIPSD      | 51517 | HITS-CLIP//PAR-CLIP                 | 23446348 23706177                                |
| hsa-let-7b-5p | MIMAT0000063 | TRMO         | 51531 | PAR-CLIP                            | 23446348                                         |
| hsa-let-7b-5p | MIMAT0000063 | MTFP1        | 51537 | Proteomics                          | 18668040                                         |



|               |              |          |       |                                         |                                     |
|---------------|--------------|----------|-------|-----------------------------------------|-------------------------------------|
| hsa-let-7b-5p | MIMAT0000063 | ZNF581   | 51545 | CLASH                                   | 23622248                            |
| hsa-let-7b-5p | MIMAT0000063 | FAM49B   | 51571 | Proteomics                              | 18668040                            |
| hsa-let-7b-5p | MIMAT0000063 | GDE1     | 51573 | Proteomics//pSILAC                      | 18668040                            |
| hsa-let-7b-5p | MIMAT0000063 | ERGIC3   | 51614 | Proteomics                              | 18668040                            |
| hsa-let-7b-5p | MIMAT0000063 | TAF9B    | 51616 | Proteomics//pSILAC                      | 18668040                            |
| hsa-let-7b-5p | MIMAT0000063 | MRPS33   | 51650 | Proteomics//pSILAC                      | 18668040                            |
| hsa-let-7b-5p | MIMAT0000063 | CHMP3    | 51652 | Proteomics                              | 18668040                            |
| hsa-let-7b-5p | MIMAT0000063 | WBP11    | 51729 | CLASH                                   | 23622248                            |
| hsa-let-7b-5p | MIMAT0000063 | FGFRL1   | 53834 | CLASH                                   | 23622248                            |
| hsa-let-7b-5p | MIMAT0000063 | CHRAC1   | 54108 | Proteomics                              | 18668040                            |
| hsa-let-7b-5p | MIMAT0000063 | TERF2IP  | 54386 | CLASH                                   | 23622248                            |
| hsa-let-7b-5p | MIMAT0000063 | SLC38A2  | 54407 | Proteomics                              | 18668040                            |
| hsa-let-7b-5p | MIMAT0000063 | XRN1     | 54464 | Proteomics                              | 18668040                            |
| hsa-let-7b-5p | MIMAT0000063 | MIOS     | 54468 | Proteomics                              | 18668040                            |
| hsa-let-7b-5p | MIMAT0000063 | MIEF1    | 54471 | PAR-CLIP                                | 23592263 24398324 21572407 20371350 |
| hsa-let-7b-5p | MIMAT0000063 | NLE1     | 54475 | Proteomics                              | 18668040                            |
| hsa-let-7b-5p | MIMAT0000063 | CHPF2    | 54480 | Proteomics//pSILAC                      | 18668040                            |
| hsa-let-7b-5p | MIMAT0000063 | FAM105A  | 54491 | HITS-CLIP//PAR-CLIP//Proteomics//pSILAC | 18668040 23592263 23446348 23706177 |
| hsa-let-7b-5p | MIMAT0000063 | MIER2    | 54531 | CLASH                                   | 23622248                            |
| hsa-let-7b-5p | MIMAT0000063 | DDX49    | 54555 | Proteomics                              | 18668040                            |
| hsa-let-7b-5p | MIMAT0000063 | CCNJ     | 54619 | Microarray                              | 17699775                            |
| hsa-let-7b-5p | MIMAT0000063 | ARL15    | 54622 | Proteomics//pSILAC                      | 18668040                            |
| hsa-let-7b-5p | MIMAT0000063 | TBC1D13  | 54662 | Proteomics                              | 18668040                            |
| hsa-let-7b-5p | MIMAT0000063 | WDR74    | 54663 | Proteomics                              | 18668040                            |
| hsa-let-7b-5p | MIMAT0000063 | MANSC1   | 54682 | CLASH                                   | 23622248                            |
| hsa-let-7b-5p | MIMAT0000063 | RBFOX1   | 54715 | Proteomics                              | 18668040                            |
| hsa-let-7b-5p | MIMAT0000063 | PPP1R12C | 54776 | CLASH                                   | 23622248                            |
| hsa-let-7b-5p | MIMAT0000063 | NSMCE4A  | 54780 | Proteomics                              | 18668040                            |
| hsa-let-7b-5p | MIMAT0000063 | HAUS6    | 54801 | CLASH                                   | 23622248                            |
| hsa-let-7b-5p | MIMAT0000063 | WDR55    | 54853 | CLASH                                   | 23622248                            |
| hsa-let-7b-5p | MIMAT0000063 | TOR4A    | 54863 | CLASH                                   | 23622248                            |
| hsa-let-7b-5p | MIMAT0000063 | GPATCH4  | 54865 | Proteomics                              | 18668040                            |
| hsa-let-7b-5p | MIMAT0000063 | PIGG     | 54872 | CLASH                                   | 23622248                            |
| hsa-let-7b-5p | MIMAT0000063 | BCOR     | 54880 | CLASH                                   | 23622248                            |
| hsa-let-7b-5p | MIMAT0000063 | NSUN2    | 54888 | CLASH                                   | 23622248                            |

|               |              |              |       |                               |                                     |
|---------------|--------------|--------------|-------|-------------------------------|-------------------------------------|
| hsa-let-7b-5p | MIMAT0000063 | NCAPG2       | 54892 | Proteomics//pSILAC            | 18668040                            |
| hsa-let-7b-5p | MIMAT0000063 | CDKAL1       | 54901 | HITS-CLIP//Proteomics//pSILAC | 18668040 23706177                   |
| hsa-let-7b-5p | MIMAT0000063 | SEMA4C       | 54910 | PAR-CLIP                      | 24398324 23446348 20371350          |
| hsa-let-7b-5p | MIMAT0000063 | DNAAF5       | 54919 | Proteomics                    | 18668040                            |
| hsa-let-7b-5p | MIMAT0000063 | DUSP23       | 54935 | Proteomics//pSILAC            | 18668040                            |
| hsa-let-7b-5p | MIMAT0000063 | DNAJC28      | 54943 | HITS-CLIP                     | 23313552                            |
| hsa-let-7b-5p | MIMAT0000063 | C1orf27      | 54953 | Proteomics//pSILAC            | 18668040                            |
| hsa-let-7b-5p | MIMAT0000063 | PARP16       | 54956 | PAR-CLIP                      | 20371350                            |
| hsa-let-7b-5p | MIMAT0000063 | INTS11       | 54973 | Proteomics                    | 18668040                            |
| hsa-let-7b-5p | MIMAT0000063 | SLC35F6      | 54978 | Proteomics//pSILAC            | 18668040                            |
| hsa-let-7b-5p | MIMAT0000063 | PIH1D1       | 55011 | Proteomics                    | 18668040                            |
| hsa-let-7b-5p | MIMAT0000063 | USP47        | 55031 | PAR-CLIP                      | 27292025                            |
| hsa-let-7b-5p | MIMAT0000063 | PDPR         | 55066 | Proteomics                    | 18668040                            |
| hsa-let-7b-5p | MIMAT0000063 | OXR1         | 55074 | CLASH                         | 23622248                            |
| hsa-let-7b-5p | MIMAT0000063 | CCDC18<br>6  | 55088 | CLASH                         | 23622248                            |
| hsa-let-7b-5p | MIMAT0000063 | GPATCH<br>1  | 55094 | CLASH                         | 23622248                            |
| hsa-let-7b-5p | MIMAT0000063 | ARHGAP<br>17 | 55114 | Proteomics                    | 18668040                            |
| hsa-let-7b-5p | MIMAT0000063 | FIGN         | 55137 | HITS-CLIP//PAR-CLIP           | 23446348 21572407 20371350 23706177 |
| hsa-let-7b-5p | MIMAT0000063 | ANKZF1       | 55139 | Proteomics                    | 18668040                            |
| hsa-let-7b-5p | MIMAT0000063 | CDCA8        | 55143 | Proteomics                    | 18668040                            |
| hsa-let-7b-5p | MIMAT0000063 | SDAD1        | 55153 | Proteomics                    | 18668040                            |
| hsa-let-7b-5p | MIMAT0000063 | TMEM33       | 55161 | Proteomics                    | 18668040                            |
| hsa-let-7b-5p | MIMAT0000063 | KLHL11       | 55175 | CLASH                         | 23622248                            |
| hsa-let-7b-5p | MIMAT0000063 | MRM3         | 55178 | Proteomics                    | 18668040                            |
| hsa-let-7b-5p | MIMAT0000063 | ARL8B        | 55207 | HITS-CLIP                     | 23706177                            |
| hsa-let-7b-5p | MIMAT0000063 | SETD5        | 55209 | CLASH                         | 23622248                            |
| hsa-let-7b-5p | MIMAT0000063 | BBS7         | 55212 | CLASH                         | 23622248                            |
| hsa-let-7b-5p | MIMAT0000063 | C11orf5<br>7 | 55216 | PAR-CLIP                      | 23592263 21572407                   |
| hsa-let-7b-5p | MIMAT0000063 | LRRC20       | 55222 | PAR-CLIP                      | 23592263                            |
| hsa-let-7b-5p | MIMAT0000063 | MOB1A        | 55233 | Proteomics                    | 18668040                            |
| hsa-let-7b-5p | MIMAT0000063 | SLC38A7      | 55238 | HITS-CLIP                     | 23706177                            |
| hsa-let-7b-5p | MIMAT0000063 | STEAP3       | 55240 | CLASH                         | 23622248                            |
| hsa-let-7b-5p | MIMAT0000063 | QRSL1        | 55278 | Proteomics                    | 18668040                            |
| hsa-let-7b-5p | MIMAT0000063 | TBC1D19      | 55296 | PAR-CLIP                      | 22291592                            |
| hsa-let-7b-5p | MIMAT0000063 | SYNJ2BP      | 55333 | PAR-CLIP                      | 23592263 26701625                   |

|               |              |             |       |                                                           |                            |
|---------------|--------------|-------------|-------|-----------------------------------------------------------|----------------------------|
| hsa-let-7b-5p | MIMAT0000063 | WDR33       | 55339 | Proteomics                                                | 18668040                   |
| hsa-let-7b-5p | MIMAT0000063 | LSG1        | 55341 | Proteomics                                                | 18668040                   |
| hsa-let-7b-5p | MIMAT0000063 | TMEM63<br>B | 55362 | CLASH                                                     | 23622248                   |
| hsa-let-7b-5p | MIMAT0000063 | LGR4        | 55366 | Flow//Luciferase reporter<br>assay//qRT-PCR//Western blot | 27179410                   |
| hsa-let-7b-5p | MIMAT0000063 | YOD1        | 55432 | PAR-CLIP                                                  | 23446348 21572407 20371350 |
| hsa-let-7b-5p | MIMAT0000063 | NDUFAF<br>7 | 55471 | Proteomics                                                | 18668040                   |
| hsa-let-7b-5p | MIMAT0000063 | DHTKD1      | 55526 | CLASH                                                     | 23622248                   |
| hsa-let-7b-5p | MIMAT0000063 | FOXRED<br>1 | 55572 | Proteomics                                                | 18668040                   |
| hsa-let-7b-5p | MIMAT0000063 | CDV3        | 55573 | PAR-CLIP                                                  | 21572407                   |
| hsa-let-7b-5p | MIMAT0000063 | SUPT20<br>H | 55578 | CLASH                                                     | 23622248                   |
| hsa-let-7b-5p | MIMAT0000063 | KIF27       | 55582 | PAR-CLIP                                                  | 22100165                   |
| hsa-let-7b-5p | MIMAT0000063 | UBE2Q1      | 55585 | CLASH                                                     | 23622248                   |
| hsa-let-7b-5p | MIMAT0000063 | OTUB1       | 55611 | CLASH                                                     | 23622248                   |
| hsa-let-7b-5p | MIMAT0000063 | TRMT1       | 55621 | Proteomics//pSILAC                                        | 18668040                   |
| hsa-let-7b-5p | MIMAT0000063 | LRRC40      | 55631 | Proteomics                                                | 18668040                   |
| hsa-let-7b-5p | MIMAT0000063 | CHD7        | 55636 | CLASH                                                     | 23622248                   |
| hsa-let-7b-5p | MIMAT0000063 | BCAS4       | 55653 | CLASH                                                     | 23622248                   |
| hsa-let-7b-5p | MIMAT0000063 | YEATS2      | 55689 | CLASH                                                     | 23622248                   |
| hsa-let-7b-5p | MIMAT0000063 | RBM22       | 55696 | CLASH                                                     | 23622248                   |
| hsa-let-7b-5p | MIMAT0000063 | IARS2       | 55699 | CLASH                                                     | 23622248                   |
| hsa-let-7b-5p | MIMAT0000063 | MAP7D1      | 55700 | Proteomics//pSILAC                                        | 18668040                   |
| hsa-let-7b-5p | MIMAT0000063 | POLR3B      | 55703 | Proteomics                                                | 18668040                   |
| hsa-let-7b-5p | MIMAT0000063 | IPO9        | 55705 | HITS-CLIP                                                 | 23313552                   |
| hsa-let-7b-5p | MIMAT0000063 | TENM3       | 55714 | CLASH                                                     | 23622248                   |
| hsa-let-7b-5p | MIMAT0000063 | SLF2        | 55719 | CLASH                                                     | 23622248                   |
| hsa-let-7b-5p | MIMAT0000063 | FAM222<br>B | 55731 | PAR-CLIP                                                  | 21572407                   |
| hsa-let-7b-5p | MIMAT0000063 | DNAJC11     | 55735 | Proteomics                                                | 18668040                   |
| hsa-let-7b-5p | MIMAT0000063 | CNDP2       | 55748 | Proteomics                                                | 18668040                   |
| hsa-let-7b-5p | MIMAT0000063 | RIOK2       | 55781 | Proteomics                                                | 18668040                   |
| hsa-let-7b-5p | MIMAT0000063 | TXLNG       | 55787 | PAR-CLIP                                                  | 21572407                   |
| hsa-let-7b-5p | MIMAT0000063 | DDX28       | 55794 | Proteomics                                                | 18668040                   |
| hsa-let-7b-5p | MIMAT0000063 | UTP6        | 55813 | Proteomics                                                | 18668040                   |
| hsa-let-7b-5p | MIMAT0000063 | DBNDD2      | 55861 | CLASH                                                     | 23622248                   |
| hsa-let-7b-5p | MIMAT0000063 | ECHDC1      | 55862 | PAR-CLIP                                                  | 21572407                   |
| hsa-let-7b-5p | MIMAT0000063 | NXT2        | 55916 | Microarray                                                | 17699775                   |
| hsa-let-7b-5p | MIMAT0000063 | YLPM1       | 56252 | CLASH                                                     | 23622248                   |

|               |              |          |       |                    |                                              |
|---------------|--------------|----------|-------|--------------------|----------------------------------------------|
| hsa-let-7b-5p | MIMAT0000063 | LRRC8A   | 56262 | Proteomics         | 18668040                                     |
| hsa-let-7b-5p | MIMAT0000063 | KYAT3    | 56267 | Proteomics//pSILAC | 18668040                                     |
| hsa-let-7b-5p | MIMAT0000063 | DIABLO   | 56616 | PAR-CLIP           | 23446348 20371350                            |
| hsa-let-7b-5p | MIMAT0000063 | SAR1A    | 56681 | HITS-CLIP          | 23706177                                     |
| hsa-let-7b-5p | MIMAT0000063 | ZC3HAV1  | 56829 | CLASH              | 23622248                                     |
| hsa-let-7b-5p | MIMAT0000063 | RAD18    | 56852 | PAR-CLIP           | 21572407                                     |
| hsa-let-7b-5p | MIMAT0000063 | DPYSL5   | 56896 | CLASH              | 23622248                                     |
| hsa-let-7b-5p | MIMAT0000063 | C1GALT1  | 56913 | CLASH              | 23622248                                     |
| hsa-let-7b-5p | MIMAT0000063 | SMARCD1  | 56916 | PAR-CLIP           | 24398324 20371350                            |
| hsa-let-7b-5p | MIMAT0000063 | DHX33    | 56919 | Proteomics         | 18668040                                     |
| hsa-let-7b-5p | MIMAT0000063 | C5orf15  | 56951 | CLASH              | 23622248                                     |
| hsa-let-7b-5p | MIMAT0000063 | ATXN7L3  | 56970 | PAR-CLIP           | 23592263                                     |
| hsa-let-7b-5p | MIMAT0000063 | YAE1D1   | 57002 | PAR-CLIP           | 23592263                                     |
| hsa-let-7b-5p | MIMAT0000063 | PITHD1   | 57095 | Proteomics         | 18668040                                     |
| hsa-let-7b-5p | MIMAT0000063 | C12orf4  | 57102 | PAR-CLIP           | 23446348                                     |
| hsa-let-7b-5p | MIMAT0000063 | MRPL47   | 57129 | Proteomics         | 18668040                                     |
| hsa-let-7b-5p | MIMAT0000063 | RALGAPB  | 57148 | CLASH              | 23622248                                     |
| hsa-let-7b-5p | MIMAT0000063 | SPRYD7   | 57213 | Proteomics         | 18668040                                     |
| hsa-let-7b-5p | MIMAT0000063 | NHSL1    | 57224 | CLASH              | 23622248                                     |
| hsa-let-7b-5p | MIMAT0000063 | SCYL1    | 57410 | Proteomics//pSILAC | 18668040                                     |
| hsa-let-7b-5p | MIMAT0000063 | BIRC6    | 57448 | qRT-PCR            | 17942906                                     |
| hsa-let-7b-5p | MIMAT0000063 | KIAA1143 | 57456 | PAR-CLIP           | 26701625                                     |
| hsa-let-7b-5p | MIMAT0000063 | SCAF4    | 57466 | Proteomics         | 18668040                                     |
| hsa-let-7b-5p | MIMAT0000063 | LRRC47   | 57470 | Proteomics         | 18668040                                     |
| hsa-let-7b-5p | MIMAT0000063 | KIDINS20 | 57498 | Proteomics         | 18668040                                     |
| hsa-let-7b-5p | MIMAT0000063 | MTUS1    | 57509 | CLASH//PAR-CLIP    | 23622248 23592263 24398324 23446348 26701625 |
| hsa-let-7b-5p | MIMAT0000063 | XPO5     | 57510 | Proteomics         | 18668040                                     |
| hsa-let-7b-5p | MIMAT0000063 | MIB1     | 57534 | CLASH              | 23622248                                     |
| hsa-let-7b-5p | MIMAT0000063 | KIAA1328 | 57536 | HITS-CLIP          | 23313552                                     |
| hsa-let-7b-5p | MIMAT0000063 | PDP2     | 57546 | CLASH//PAR-CLIP    | 23622248 23592263                            |
| hsa-let-7b-5p | MIMAT0000063 | CEP126   | 57562 | CLASH              | 23622248                                     |
| hsa-let-7b-5p | MIMAT0000063 | ZNF687   | 57592 | CLASH              | 23622248                                     |
| hsa-let-7b-5p | MIMAT0000063 | KIAA1549 | 57670 | CLASH              | 23622248                                     |
| hsa-let-7b-5p | MIMAT0000063 | KIAA1586 | 57691 | CLASH              | 23622248                                     |
| hsa-let-7b-5p | MIMAT0000063 | ZNF317   | 57693 | CLASH              | 23622248                                     |

|               |              |          |       |                                                       |                                     |
|---------------|--------------|----------|-------|-------------------------------------------------------|-------------------------------------|
| hsa-let-7b-5p | MIMAT0000063 | IGDCC4   | 57722 | PAR-CLIP                                              | 23446348 21572407 20371350 26701625 |
| hsa-let-7b-5p | MIMAT0000063 | NCOA5    | 57727 | CLASH                                                 | 23622248                            |
| hsa-let-7b-5p | MIMAT0000063 | RAB40C   | 57799 | PAR-CLIP                                              | 23592263                            |
| hsa-let-7b-5p | MIMAT0000063 | RAP2C    | 57826 | Proteomics                                            | 18668040                            |
| hsa-let-7b-5p | MIMAT0000063 | TRAPPC1  | 58485 | CLASH                                                 | 23622248                            |
| hsa-let-7b-5p | MIMAT0000063 | ABHD17C  | 58489 | PAR-CLIP                                              | 20371350                            |
| hsa-let-7b-5p | MIMAT0000063 | TLNRD1   | 59274 | CLASH                                                 | 23622248                            |
| hsa-let-7b-5p | MIMAT0000063 | CACNG8   | 59283 | CLASH                                                 | 23622248                            |
| hsa-let-7b-5p | MIMAT0000063 | SLC25A19 | 60386 | Proteomics                                            | 18668040                            |
| hsa-let-7b-5p | MIMAT0000063 | SPCS3    | 60559 | Proteomics//pSILAC                                    | 18668040                            |
| hsa-let-7b-5p | MIMAT0000063 | BCORL1   | 63035 | CLASH                                                 | 23622248                            |
| hsa-let-7b-5p | MIMAT0000063 | GALNT11  | 63917 | CLASH                                                 | 23622248                            |
| hsa-let-7b-5p | MIMAT0000063 | PRSS22   | 64063 | HITS-CLIP                                             | 23313552                            |
| hsa-let-7b-5p | MIMAT0000063 | XYLT2    | 64132 | CLASH                                                 | 23622248                            |
| hsa-let-7b-5p | MIMAT0000063 | ERAP2    | 64167 | CLASH                                                 | 23622248                            |
| hsa-let-7b-5p | MIMAT0000063 | DNAJC1   | 64215 | Proteomics                                            | 18668040                            |
| hsa-let-7b-5p | MIMAT0000063 | NSD1     | 64324 | PAR-CLIP                                              | 24398324                            |
| hsa-let-7b-5p | MIMAT0000063 | NXN      | 64359 | Proteomics//pSILAC                                    | 18668040                            |
| hsa-let-7b-5p | MIMAT0000063 | ZNF106   | 64397 | CLASH                                                 | 23622248                            |
| hsa-let-7b-5p | MIMAT0000063 | GZF1     | 64412 | Microarray                                            | 17699775                            |
| hsa-let-7b-5p | MIMAT0000063 | NOM1     | 64434 | PAR-CLIP                                              | 23592263 23446348                   |
| hsa-let-7b-5p | MIMAT0000063 | CPEB1    | 64506 | Luciferase reporter assay//Microarray//qRT-PCR        | 22995917                            |
| hsa-let-7b-5p | MIMAT0000063 | ANAPC1   | 64682 | Microarray//Proteomics//pSILAC//qRT-PCR//Western blot | 18668040 26540468                   |
| hsa-let-7b-5p | MIMAT0000063 | NUCKS1   | 64710 | CLASH                                                 | 23622248                            |
| hsa-let-7b-5p | MIMAT0000063 | TBC1D15  | 64786 | Proteomics                                            | 18668040                            |
| hsa-let-7b-5p | MIMAT0000063 | ELOVL1   | 64834 | Proteomics                                            | 18668040                            |
| hsa-let-7b-5p | MIMAT0000063 | TUT1     | 64852 | CLASH                                                 | 23622248                            |
| hsa-let-7b-5p | MIMAT0000063 | AIDA     | 64853 | CLASH                                                 | 23622248                            |
| hsa-let-7b-5p | MIMAT0000063 | CCDC71   | 64925 | CLASH                                                 | 23622248                            |
| hsa-let-7b-5p | MIMAT0000063 | NT5DC2   | 64943 | CLASH                                                 | 23622248                            |
| hsa-let-7b-5p | MIMAT0000063 | MRPS24   | 64951 | Proteomics//pSILAC                                    | 18668040                            |
| hsa-let-7b-5p | MIMAT0000063 | MRPS11   | 64963 | CLASH                                                 | 23622248                            |
| hsa-let-7b-5p | MIMAT0000063 | NOL6     | 65083 | Proteomics                                            | 18668040                            |

|               |              |          |       |                                           |                                     |
|---------------|--------------|----------|-------|-------------------------------------------|-------------------------------------|
| hsa-let-7b-5p | MIMAT0000063 | MARCKSL1 | 65108 | PAR-CLIP                                  | 26701625                            |
| hsa-let-7b-5p | MIMAT0000063 | WNK1     | 65125 | CLASH                                     | 23622248                            |
| hsa-let-7b-5p | MIMAT0000063 | PYCR3    | 65263 | Proteomics                                | 18668040                            |
| hsa-let-7b-5p | MIMAT0000063 | PLEKHA3  | 65977 | PAR-CLIP                                  | 21572407                            |
| hsa-let-7b-5p | MIMAT0000063 | PHACTR4  | 65979 | HITS-CLIP                                 | 23706177                            |
| hsa-let-7b-5p | MIMAT0000063 | GGCT     | 79017 | Proteomics//pSILAC                        | 18668040                            |
| hsa-let-7b-5p | MIMAT0000063 | PDCL3    | 79031 | CLASH                                     | 23622248                            |
| hsa-let-7b-5p | MIMAT0000063 | NABP2    | 79035 | CLASH                                     | 23622248                            |
| hsa-let-7b-5p | MIMAT0000063 | KXD1     | 79036 | CLASH                                     | 23622248                            |
| hsa-let-7b-5p | MIMAT0000063 | ASPSCR1  | 79058 | CLASH                                     | 23622248                            |
| hsa-let-7b-5p | MIMAT0000063 | ATG9A    | 79065 | PAR-CLIP//Proteomics                      | 18668040 23592263 26701625 27292025 |
| hsa-let-7b-5p | MIMAT0000063 | FTO      | 79068 | CLASH                                     | 23622248                            |
| hsa-let-7b-5p | MIMAT0000063 | DCTPP1   | 79077 | Proteomics//pSILAC                        | 18668040                            |
| hsa-let-7b-5p | MIMAT0000063 | ZNF426   | 79088 | CLASH                                     | 23622248                            |
| hsa-let-7b-5p | MIMAT0000063 | EFHD2    | 79180 | PAR-CLIP                                  | 23592263                            |
| hsa-let-7b-5p | MIMAT0000063 | WDR25    | 79446 | CLASH                                     | 23622248                            |
| hsa-let-7b-5p | MIMAT0000063 | ADIPOR2  | 79602 | CLASH//PAR-CLIP                           | 23622248 21572407                   |
| hsa-let-7b-5p | MIMAT0000063 | RHBDF2   | 79651 | PAR-CLIP                                  | 26701625                            |
| hsa-let-7b-5p | MIMAT0000063 | MSANTD2  | 79684 | CLASH                                     | 23622248                            |
| hsa-let-7b-5p | MIMAT0000063 | IPO4     | 79711 | CLASH//Proteomics//pSILAC                 | 18668040 23622248                   |
| hsa-let-7b-5p | MIMAT0000063 | LIN28A   | 79727 | Luciferase reporter assay//Reporter assay | 15131085                            |
| hsa-let-7b-5p | MIMAT0000063 | NARS2    | 79731 | Proteomics                                | 18668040                            |
| hsa-let-7b-5p | MIMAT0000063 | GEMIN7   | 79760 | Proteomics//pSILAC                        | 18668040                            |
| hsa-let-7b-5p | MIMAT0000063 | ISOC2    | 79763 | CLASH                                     | 23622248                            |
| hsa-let-7b-5p | MIMAT0000063 | ZFH4     | 79776 | CLASH                                     | 23622248                            |
| hsa-let-7b-5p | MIMAT0000063 | C12orf49 | 79794 | CLASH                                     | 23622248                            |
| hsa-let-7b-5p | MIMAT0000063 | NAA40    | 79829 | Proteomics//pSILAC                        | 18668040                            |
| hsa-let-7b-5p | MIMAT0000063 | FAM57A   | 79850 | CLASH                                     | 23622248                            |
| hsa-let-7b-5p | MIMAT0000063 | CCDC134  | 79879 | Proteomics                                | 18668040                            |
| hsa-let-7b-5p | MIMAT0000063 | MRM1     | 79922 | Proteomics//pSILAC                        | 18668040                            |
| hsa-let-7b-5p | MIMAT0000063 | WLS      | 79971 | Proteomics                                | 18668040                            |
| hsa-let-7b-5p | MIMAT0000063 | CPED1    | 79974 | Microarray                                | 17699775                            |
| hsa-let-7b-5p | MIMAT0000063 | DOCK5    | 80005 | Proteomics//pSILAC                        | 18668040                            |
| hsa-let-7b-5p | MIMAT0000063 | NAA25    | 80018 | Proteomics//pSILAC                        | 18668040                            |
| hsa-let-7b-5p | MIMAT0000063 | FOXRED2  | 80020 | CLASH                                     | 23622248                            |

|               |              |              |       |                                                |                            |
|---------------|--------------|--------------|-------|------------------------------------------------|----------------------------|
| hsa-let-7b-5p | MIMAT0000063 | ZNF556       | 80032 | HITS-CLIP                                      | 23824327                   |
| hsa-let-7b-5p | MIMAT0000063 | ZNF606       | 80095 | CLASH                                          | 23622248                   |
| hsa-let-7b-5p | MIMAT0000063 | PTGES2       | 80142 | CLASH                                          | 23622248                   |
| hsa-let-7b-5p | MIMAT0000063 | SIKE1        | 80143 | CLASH                                          | 23622248                   |
| hsa-let-7b-5p | MIMAT0000063 | NAA15        | 80155 | Proteomics                                     | 18668040                   |
| hsa-let-7b-5p | MIMAT0000063 | OPA3         | 80207 | PAR-CLIP                                       | 23592263 26701625          |
| hsa-let-7b-5p | MIMAT0000063 | NAA50        | 80218 | Proteomics                                     | 18668040                   |
| hsa-let-7b-5p | MIMAT0000063 | PAAF1        | 80227 | Proteomics                                     | 18668040                   |
| hsa-let-7b-5p | MIMAT0000063 | WDR26        | 80232 | CLASH                                          | 23622248                   |
| hsa-let-7b-5p | MIMAT0000063 | EDEM3        | 80267 | HITS-CLIP//Proteomics//pSILAC                  | 18668040 23313552          |
| hsa-let-7b-5p | MIMAT0000063 | WDCP         | 80304 | CLASH                                          | 23622248                   |
| hsa-let-7b-5p | MIMAT0000063 | TRABD        | 80305 | CLASH//Proteomics//pSILAC                      | 18668040 23622248          |
| hsa-let-7b-5p | MIMAT0000063 | MED28        | 80306 | CLASH                                          | 23622248                   |
| hsa-let-7b-5p | MIMAT0000063 | FLAD1        | 80308 | CLASH//Proteomics                              | 18668040 23622248          |
| hsa-let-7b-5p | MIMAT0000063 | CPEB4        | 80315 | Luciferase reporter assay//Microarray//qRT-PCR | 22995917                   |
| hsa-let-7b-5p | MIMAT0000063 | PUS1         | 80324 | Proteomics                                     | 18668040                   |
| hsa-let-7b-5p | MIMAT0000063 | REEP4        | 80346 | Proteomics                                     | 18668040                   |
| hsa-let-7b-5p | MIMAT0000063 | SLC19A3      | 80704 | HITS-CLIP                                      | 23706177                   |
| hsa-let-7b-5p | MIMAT0000063 | AARSD1       | 80755 | Proteomics//pSILAC                             | 18668040                   |
| hsa-let-7b-5p | MIMAT0000063 | CPTP         | 80772 | CLASH                                          | 23622248                   |
| hsa-let-7b-5p | MIMAT0000063 | LIMD2        | 80774 | PAR-CLIP                                       | 23592263                   |
| hsa-let-7b-5p | MIMAT0000063 | INTS5        | 80789 | Proteomics                                     | 18668040                   |
| hsa-let-7b-5p | MIMAT0000063 | SLC25A3<br>2 | 81034 | Proteomics//pSILAC                             | 18668040                   |
| hsa-let-7b-5p | MIMAT0000063 | COLEC12      | 81035 | PAR-CLIP                                       | 21572407                   |
| hsa-let-7b-5p | MIMAT0000063 | SLC38A1      | 81539 | Proteomics                                     | 18668040                   |
| hsa-let-7b-5p | MIMAT0000063 | GDPD5        | 81544 | CLASH                                          | 23622248                   |
| hsa-let-7b-5p | MIMAT0000063 | RCC1L        | 81554 | Proteomics                                     | 18668040                   |
| hsa-let-7b-5p | MIMAT0000063 | INTS14       | 81556 | Proteomics                                     | 18668040                   |
| hsa-let-7b-5p | MIMAT0000063 | C1orf21      | 81563 | PAR-CLIP                                       | 20371350                   |
| hsa-let-7b-5p | MIMAT0000063 | ANP32E       | 81611 | Proteomics                                     | 18668040                   |
| hsa-let-7b-5p | MIMAT0000063 | C6orf62      | 81688 | CLASH                                          | 23622248                   |
| hsa-let-7b-5p | MIMAT0000063 | ZNF611       | 81856 | HITS-CLIP//PAR-CLIP                            | 21572407 20371350 23706177 |
| hsa-let-7b-5p | MIMAT0000063 | MED25        | 81857 | CLASH                                          | 23622248                   |
| hsa-let-7b-5p | MIMAT0000063 | EMC6         | 83460 | Proteomics                                     | 18668040                   |

|               |              |           |       |                     |                            |
|---------------|--------------|-----------|-------|---------------------|----------------------------|
| hsa-let-7b-5p | MIMAT0000063 | DNAL1     | 83544 | PAR-CLIP            | 21572407 27292025          |
| hsa-let-7b-5p | MIMAT0000063 | UCK1      | 83549 | CLASH               | 23622248                   |
| hsa-let-7b-5p | MIMAT0000063 | ATAD3B    | 83858 | Proteomics//pSILAC  | 18668040                   |
| hsa-let-7b-5p | MIMAT0000063 | CDCA7     | 83879 | Microarray          | 17699775                   |
| hsa-let-7b-5p | MIMAT0000063 | HASPIN    | 83903 | HITS-CLIP//PAR-CLIP | 21572407 20371350 23706177 |
| hsa-let-7b-5p | MIMAT0000063 | KREMEN1   | 83999 | PAR-CLIP            | 23592263 26701625          |
| hsa-let-7b-5p | MIMAT0000063 | EMILIN2   | 84034 | HITS-CLIP//PAR-CLIP | 20371350 23706177          |
| hsa-let-7b-5p | MIMAT0000063 | SLC10A7   | 84068 | PAR-CLIP            | 24398324 21572407 20371350 |
| hsa-let-7b-5p | MIMAT0000063 | WDR75     | 84128 | Proteomics          | 18668040                   |
| hsa-let-7b-5p | MIMAT0000063 | TOMM4OL   | 84134 | PAR-CLIP            | 26701625 27292025          |
| hsa-let-7b-5p | MIMAT0000063 | UTP15     | 84135 | Proteomics          | 18668040                   |
| hsa-let-7b-5p | MIMAT0000063 | ZNF644    | 84146 | PAR-CLIP            | 23446348                   |
| hsa-let-7b-5p | MIMAT0000063 | ANTXR1    | 84168 | CLASH               | 23622248                   |
| hsa-let-7b-5p | MIMAT0000063 | POLR1B    | 84172 | Proteomics          | 18668040                   |
| hsa-let-7b-5p | MIMAT0000063 | FAM96A    | 84191 | Proteomics//pSILAC  | 18668040                   |
| hsa-let-7b-5p | MIMAT0000063 | ZCCHC9    | 84240 | CLASH               | 23622248                   |
| hsa-let-7b-5p | MIMAT0000063 | NOA1      | 84273 | PAR-CLIP            | 23592263 23446348          |
| hsa-let-7b-5p | MIMAT0000063 | FAM213A   | 84293 | Proteomics          | 18668040                   |
| hsa-let-7b-5p | MIMAT0000063 | LLPH      | 84298 | Proteomics          | 18668040                   |
| hsa-let-7b-5p | MIMAT0000063 | MIEN1     | 84299 | CLASH               | 23622248                   |
| hsa-let-7b-5p | MIMAT0000063 | CCDC115   | 84317 | Proteomics//pSILAC  | 18668040                   |
| hsa-let-7b-5p | MIMAT0000063 | LZIC      | 84328 | Proteomics          | 18668040                   |
| hsa-let-7b-5p | MIMAT0000063 | GFM2      | 84340 | Proteomics          | 18668040                   |
| hsa-let-7b-5p | MIMAT0000063 | CYSTM1    | 84418 | CLASH               | 23622248                   |
| hsa-let-7b-5p | MIMAT0000063 | RAB11FIP4 | 84440 | PAR-CLIP            | 24398324                   |
| hsa-let-7b-5p | MIMAT0000063 | ZBTB37    | 84614 | PAR-CLIP            | 20371350                   |
| hsa-let-7b-5p | MIMAT0000063 | USP38     | 84640 | PAR-CLIP            | 21572407                   |
| hsa-let-7b-5p | MIMAT0000063 | FAM126A   | 84668 | CLASH               | 23622248                   |
| hsa-let-7b-5p | MIMAT0000063 | GTPBP3    | 84705 | Proteomics//pSILAC  | 18668040                   |
| hsa-let-7b-5p | MIMAT0000063 | PRRC2B    | 84726 | CLASH               | 23622248                   |
| hsa-let-7b-5p | MIMAT0000063 | FUT10     | 84750 | PAR-CLIP            | 23592263 26701625          |
| hsa-let-7b-5p | MIMAT0000063 | TUBA1C    | 84790 | CLASH               | 23622248                   |
| hsa-let-7b-5p | MIMAT0000063 | IL17RC    | 84818 | CLASH               | 23622248                   |
| hsa-let-7b-5p | MIMAT0000063 | PLXDC2    | 84898 | Proteomics          | 18668040                   |
| hsa-let-7b-5p | MIMAT0000063 | FAM136A   | 84908 | CLASH               | 23622248                   |
| hsa-let-7b-5p | MIMAT0000063 | ZNF587    | 84914 | PAR-CLIP            | 23592263                   |
| hsa-let-7b-5p | MIMAT0000063 | PPP1R15B  | 84919 | PAR-CLIP            | 23592263 27292025          |



|               |              |               |        |                           |                            |
|---------------|--------------|---------------|--------|---------------------------|----------------------------|
| hsa-let-7b-5p | MIMAT0000063 | FAM104<br>A   | 84923  | PAR-CLIP                  | 20371350                   |
| hsa-let-7b-5p | MIMAT0000063 | ZNF566        | 84924  | PAR-CLIP                  | 23446348 21572407 20371350 |
| hsa-let-7b-5p | MIMAT0000063 | MPND          | 84954  | CLASH                     | 23622248                   |
| hsa-let-7b-5p | MIMAT0000063 | FBXL20        | 84961  | PAR-CLIP                  | 21572407                   |
| hsa-let-7b-5p | MIMAT0000063 | REPS1         | 85021  | CLASH                     | 23622248                   |
| hsa-let-7b-5p | MIMAT0000063 | HIST1H2<br>BK | 85236  | PAR-CLIP                  | 23592263 27292025          |
| hsa-let-7b-5p | MIMAT0000063 | ZCCHC3        | 85364  | PAR-CLIP                  | 23446348 26701625          |
| hsa-let-7b-5p | MIMAT0000063 | EAF1          | 85403  | CLASH                     | 23622248                   |
| hsa-let-7b-5p | MIMAT0000063 | MIDN          | 90007  | CLASH//PAR-CLIP           | 23622248 26701625          |
| hsa-let-7b-5p | MIMAT0000063 | ZNF799        | 90576  | HITS-CLIP                 | 23313552                   |
| hsa-let-7b-5p | MIMAT0000063 | PIP4P1        | 90809  | CLASH                     | 23622248                   |
| hsa-let-7b-5p | MIMAT0000063 | ADCK2         | 90956  | CLASH                     | 23622248                   |
| hsa-let-7b-5p | MIMAT0000063 | DHX57         | 90957  | CLASH//Proteomics//pSILAC | 18668040 23622248          |
| hsa-let-7b-5p | MIMAT0000063 | FMNL3         | 91010  | PAR-CLIP                  | 22100165                   |
| hsa-let-7b-5p | MIMAT0000063 | L3MBTL<br>4   | 91133  | CLASH                     | 23622248                   |
| hsa-let-7b-5p | MIMAT0000063 | YTHDC1        | 91746  | CLASH                     | 23622248                   |
| hsa-let-7b-5p | MIMAT0000063 | NEK9          | 91754  | CLASH                     | 23622248                   |
| hsa-let-7b-5p | MIMAT0000063 | C11orf5<br>2  | 91894  | CLASH                     | 23622248                   |
| hsa-let-7b-5p | MIMAT0000063 | ZC3HAV<br>1L  | 92092  | PAR-CLIP                  | 23592263                   |
| hsa-let-7b-5p | MIMAT0000063 | OXNAD1        | 92106  | Proteomics                | 18668040                   |
| hsa-let-7b-5p | MIMAT0000063 | MTSS1L        | 92154  | CLASH                     | 23622248                   |
| hsa-let-7b-5p | MIMAT0000063 | NAF1          | 92345  | Proteomics                | 18668040                   |
| hsa-let-7b-5p | MIMAT0000063 | MOB1B         | 92597  | Proteomics                | 18668040                   |
| hsa-let-7b-5p | MIMAT0000063 | TIMM50        | 92609  | CLASH                     | 23622248                   |
| hsa-let-7b-5p | MIMAT0000063 | MGME1         | 92667  | Proteomics//pSILAC        | 18668040                   |
| hsa-let-7b-5p | MIMAT0000063 | SLC38A5       | 92745  | Proteomics                | 18668040                   |
| hsa-let-7b-5p | MIMAT0000063 | MARS2         | 92935  | PAR-CLIP//pSILAC          | 18668040 26701625          |
| hsa-let-7b-5p | MIMAT0000063 | IGSF8         | 93185  | CLASH                     | 23622248                   |
| hsa-let-7b-5p | MIMAT0000063 | SDR42E1       | 93517  | PAR-CLIP                  | 24398324                   |
| hsa-let-7b-5p | MIMAT0000063 | ZFAND4        | 93550  | HITS-CLIP//PAR-CLIP       | 23706177 23313552 27292025 |
| hsa-let-7b-5p | MIMAT0000063 | MFSD3         | 113655 | CLASH                     | 23622248                   |
| hsa-let-7b-5p | MIMAT0000063 | TOE1          | 114034 | Proteomics                | 18668040                   |
| hsa-let-7b-5p | MIMAT0000063 | BTBD9         | 114781 | CLASH                     | 23622248                   |
| hsa-let-7b-5p | MIMAT0000063 | MBD6          | 114785 | CLASH                     | 23622248                   |
| hsa-let-7b-5p | MIMAT0000063 | OSBPL10       | 114884 | Proteomics                | 18668040                   |
| hsa-let-7b-5p | MIMAT0000063 | KCTD12        | 115207 | Proteomics                | 18668040                   |

|               |              |          |        |                                                  |                                                                         |
|---------------|--------------|----------|--------|--------------------------------------------------|-------------------------------------------------------------------------|
| hsa-let-7b-5p | MIMAT0000063 | CTHRC1   | 115908 | Luciferase reporter assay//qRT-PCR//Western blot | 25510669                                                                |
| hsa-let-7b-5p | MIMAT0000063 | TSEN15   | 116461 | CLASH                                            | 23622248                                                                |
| hsa-let-7b-5p | MIMAT0000063 | DCD      | 117159 | Proteomics                                       | 18668040                                                                |
| hsa-let-7b-5p | MIMAT0000063 | RFFL     | 117584 | CLASH                                            | 23622248                                                                |
| hsa-let-7b-5p | MIMAT0000063 | PDZD8    | 118987 | PAR-CLIP                                         | 21572407                                                                |
| hsa-let-7b-5p | MIMAT0000063 | LRIG3    | 121227 | PAR-CLIP                                         | 21572407 20371350                                                       |
| hsa-let-7b-5p | MIMAT0000063 | NAA30    | 122830 | PAR-CLIP                                         | 21572407                                                                |
| hsa-let-7b-5p | MIMAT0000063 | MSI2     | 124540 | PAR-CLIP                                         | 21572407                                                                |
| hsa-let-7b-5p | MIMAT0000063 | C19orf47 | 126526 | PAR-CLIP                                         | 21572407 20371350                                                       |
| hsa-let-7b-5p | MIMAT0000063 | GABPB2   | 126626 | CLASH                                            | 23622248                                                                |
| hsa-let-7b-5p | MIMAT0000063 | TBC1D20  | 128637 | CLASH                                            | 23622248                                                                |
| hsa-let-7b-5p | MIMAT0000063 | PIGU     | 128869 | Proteomics                                       | 18668040                                                                |
| hsa-let-7b-5p | MIMAT0000063 | NUP35    | 129401 | Proteomics                                       | 18668040                                                                |
| hsa-let-7b-5p | MIMAT0000063 | TRIM71   | 131405 | PAR-CLIP                                         | 20371350                                                                |
| hsa-let-7b-5p | MIMAT0000063 | FAM131A  | 131408 | CLASH                                            | 23622248                                                                |
| hsa-let-7b-5p | MIMAT0000063 | FAM43A   | 131583 | PAR-CLIP                                         | 23592263 20371350                                                       |
| hsa-let-7b-5p | MIMAT0000063 | GRPEL2   | 134266 | CLASH//PAR-CLIP//Proteomics//pSILAC              | 18668040 23622248 23592263 24398324 23446348 21572407 20371350 26701625 |
| hsa-let-7b-5p | MIMAT0000063 | C5orf24  | 134553 | CLASH                                            | 23622248                                                                |
| hsa-let-7b-5p | MIMAT0000063 | PM20D2   | 135293 | PAR-CLIP                                         | 21572407                                                                |
| hsa-let-7b-5p | MIMAT0000063 | MTPN     | 136319 | Reporter assay                                   | 15806104                                                                |
| hsa-let-7b-5p | MIMAT0000063 | UBXN2B   | 137886 | PAR-CLIP                                         | 21572407                                                                |
| hsa-let-7b-5p | MIMAT0000063 | GPAT4    | 137964 | PAR-CLIP                                         | 26701625                                                                |
| hsa-let-7b-5p | MIMAT0000063 | BRI3BP   | 140707 | HITS-CLIP                                        | 23706177                                                                |
| hsa-let-7b-5p | MIMAT0000063 | SMCR8    | 140775 | PAR-CLIP                                         | 24398324 23446348 21572407 26701625 27292025                            |
| hsa-let-7b-5p | MIMAT0000063 | E2F7     | 144455 | CLASH                                            | 23622248                                                                |
| hsa-let-7b-5p | MIMAT0000063 | ZNF578   | 147660 | HITS-CLIP                                        | 23706177                                                                |
| hsa-let-7b-5p | MIMAT0000063 | ZNF417   | 147687 | HITS-CLIP                                        | 23313552                                                                |
| hsa-let-7b-5p | MIMAT0000063 | ZNF738   | 148203 | HITS-CLIP                                        | 23706177                                                                |
| hsa-let-7b-5p | MIMAT0000063 | SLC30A7  | 148867 | Proteomics                                       | 18668040                                                                |
| hsa-let-7b-5p | MIMAT0000063 | C1orf210 | 149466 | HITS-CLIP//PAR-CLIP                              | 23446348 21572407 23706177                                              |
| hsa-let-7b-5p | MIMAT0000063 | DTX3L    | 151636 | HITS-CLIP                                        | 23706177                                                                |
| hsa-let-7b-5p | MIMAT0000063 | CMC1     | 152100 | Proteomics                                       | 18668040                                                                |
| hsa-let-7b-5p | MIMAT0000063 | DAB2IP   | 153090 | CLASH                                            | 23622248                                                                |

|               |              |          |        |                                               |                                                       |
|---------------|--------------|----------|--------|-----------------------------------------------|-------------------------------------------------------|
| hsa-let-7b-5p | MIMAT0000063 | CEP120   | 153241 | PAR-CLIP                                      | 23592263                                              |
| hsa-let-7b-5p | MIMAT0000063 | TMEM167A | 153339 | Proteomics                                    | 18668040                                              |
| hsa-let-7b-5p | MIMAT0000063 | TMEM65   | 157378 | Proteomics                                    | 18668040                                              |
| hsa-let-7b-5p | MIMAT0000063 | RDH10    | 157506 | Luciferase reporter assay//Proteomics//pSILAC | 18668040                                              |
| hsa-let-7b-5p | MIMAT0000063 | ANKRD46  | 157567 | PAR-CLIP                                      | 22100165 26701625                                     |
| hsa-let-7b-5p | MIMAT0000063 | FAM84B   | 157638 | CLASH                                         | 23622248                                              |
| hsa-let-7b-5p | MIMAT0000063 | USP54    | 159195 | CLASH                                         | 23622248                                              |
| hsa-let-7b-5p | MIMAT0000063 | TMTC3    | 160418 | PAR-CLIP//Proteomics                          | 18668040 23592263                                     |
| hsa-let-7b-5p | MIMAT0000063 | IFNLR1   | 163702 | PAR-CLIP                                      | 23592263                                              |
| hsa-let-7b-5p | MIMAT0000063 | AGO3     | 192669 | Microarray                                    | 17699775                                              |
| hsa-let-7b-5p | MIMAT0000063 | TMEM201  | 199953 | CLASH//Proteomics                             | 18668040 23622248                                     |
| hsa-let-7b-5p | MIMAT0000063 | TXLNA    | 200081 | CLASH//PAR-CLIP                               | 23622248 21572407                                     |
| hsa-let-7b-5p | MIMAT0000063 | IBA57    | 200205 | CLASH                                         | 23622248                                              |
| hsa-let-7b-5p | MIMAT0000063 | KLHDC8B  | 200942 | PAR-CLIP                                      | 23592263                                              |
| hsa-let-7b-5p | MIMAT0000063 | CENPV    | 201161 | Proteomics                                    | 18668040                                              |
| hsa-let-7b-5p | MIMAT0000063 | UNC13D   | 201294 | Proteomics                                    | 18668040                                              |
| hsa-let-7b-5p | MIMAT0000063 | ZNF584   | 201514 | HITS-CLIP                                     | 23706177                                              |
| hsa-let-7b-5p | MIMAT0000063 | PDE12    | 201626 | Microarray//PAR-CLIP//Proteomics              | 17699775 18668040 24398324 23446348 21572407 20371350 |
| hsa-let-7b-5p | MIMAT0000063 | TUBB     | 203068 | CLASH                                         | 23622248                                              |
| hsa-let-7b-5p | MIMAT0000063 | HIPK1    | 204851 | CLASH                                         | 23622248                                              |
| hsa-let-7b-5p | MIMAT0000063 | CCNY     | 219771 | Proteomics                                    | 18668040                                              |
| hsa-let-7b-5p | MIMAT0000063 | SLC16A9  | 220963 | PAR-CLIP                                      | 21572407                                              |
| hsa-let-7b-5p | MIMAT0000063 | FOXK1    | 221937 | Proteomics                                    | 18668040                                              |
| hsa-let-7b-5p | MIMAT0000063 | TMED4    | 222068 | PAR-CLIP                                      | 27292025                                              |
| hsa-let-7b-5p | MIMAT0000063 | SLC35F1  | 222553 | CLASH                                         | 23622248                                              |
| hsa-let-7b-5p | MIMAT0000063 | AFG1L    | 246269 | CLASH                                         | 23622248                                              |
| hsa-let-7b-5p | MIMAT0000063 | MMS22L   | 253714 | Proteomics//pSILAC                            | 18668040                                              |
| hsa-let-7b-5p | MIMAT0000063 | RNF144B  | 255488 | PAR-CLIP                                      | 23592263                                              |
| hsa-let-7b-5p | MIMAT0000063 | ELMOD2   | 255520 | CLASH                                         | 23622248                                              |
| hsa-let-7b-5p | MIMAT0000063 | MFSB8    | 256471 | PAR-CLIP                                      | 24398324                                              |
| hsa-let-7b-5p | MIMAT0000063 | PGM2L1   | 283209 | PAR-CLIP                                      | 23592263                                              |
| hsa-let-7b-5p | MIMAT0000063 | KCTD21   | 283219 | PAR-CLIP                                      | 23592263                                              |
| hsa-let-7b-5p | MIMAT0000063 | TTC9C    | 283237 | Proteomics//pSILAC                            | 18668040                                              |
| hsa-let-7b-5p | MIMAT0000063 | ANKRD52  | 283373 | CLASH                                         | 23622248                                              |
| hsa-let-7b-5p | MIMAT0000063 | SPRYD4   | 283377 | Proteomics//pSILAC                            | 18668040                                              |

|               |              |              |        |                                       |                                                                |
|---------------|--------------|--------------|--------|---------------------------------------|----------------------------------------------------------------|
| hsa-let-7b-5p | MIMAT0000063 | GATC         | 283459 | Proteomics                            | 18668040                                                       |
| hsa-let-7b-5p | MIMAT0000063 | PRTG         | 283659 | CLASH                                 | 23622248                                                       |
| hsa-let-7b-5p | MIMAT0000063 | ZADH2        | 284273 | CLASH//Proteomics                     | 18668040 23622248                                              |
| hsa-let-7b-5p | MIMAT0000063 | ZNF841       | 284371 | CLASH                                 | 23622248                                                       |
| hsa-let-7b-5p | MIMAT0000063 | NBPF15       | 284565 | CLASH                                 | 23622248                                                       |
| hsa-let-7b-5p | MIMAT0000063 | C5orf51      | 285636 | PAR-CLIP                              | 23592263 24398324 23446348 21572407 20371350 26701625 27292025 |
| hsa-let-7b-5p | MIMAT0000063 | RNASE10      | 338879 | CLASH                                 | 23622248                                                       |
| hsa-let-7b-5p | MIMAT0000063 | ZBTB80S      | 339487 | HITS-CLIP//PAR-CLIP                   | 23446348 23706177                                              |
| hsa-let-7b-5p | MIMAT0000063 | NAT8L        | 339983 | PAR-CLIP                              | 21572407                                                       |
| hsa-let-7b-5p | MIMAT0000063 | ACER2        | 340485 | PAR-CLIP                              | 24398324                                                       |
| hsa-let-7b-5p | MIMAT0000063 | ZNF774       | 342132 | HITS-CLIP//PAR-CLIP                   | 22100165 27418678                                              |
| hsa-let-7b-5p | MIMAT0000063 | ATXN1L       | 342371 | CLASH                                 | 23622248                                                       |
| hsa-let-7b-5p | MIMAT0000063 | MTX3         | 345778 | HITS-CLIP                             | 23706177                                                       |
| hsa-let-7b-5p | MIMAT0000063 | SPATA12      | 353324 | CLASH                                 | 23622248                                                       |
| hsa-let-7b-5p | MIMAT0000063 | IRF2BP2      | 359948 | CLASH                                 | 23622248                                                       |
| hsa-let-7b-5p | MIMAT0000063 | NDUFA4P1     | 360165 | PAR-CLIP                              | 22100165                                                       |
| hsa-let-7b-5p | MIMAT0000063 | NHLRC2       | 374354 | HITS-CLIP                             | 23313552                                                       |
| hsa-let-7b-5p | MIMAT0000063 | DRAXIN       | 374946 | CLASH                                 | 23622248                                                       |
| hsa-let-7b-5p | MIMAT0000063 | NHLRC3       | 387921 | PAR-CLIP                              | 24398324 21572407 20371350                                     |
| hsa-let-7b-5p | MIMAT0000063 | BEND4        | 389206 | PAR-CLIP                              | 21572407 20371350                                              |
| hsa-let-7b-5p | MIMAT0000063 | PSMG4        | 389362 | CLASH                                 | 23622248                                                       |
| hsa-let-7b-5p | MIMAT0000063 | LIN28B       | 389421 | Luciferase reporter assay//Microarray | 17699775 16971064                                              |
| hsa-let-7b-5p | MIMAT0000063 | RBM12B       | 389677 | PAR-CLIP//Proteomics                  | 18668040 21572407 20371350                                     |
| hsa-let-7b-5p | MIMAT0000063 | NUDT19       | 390916 | Proteomics//pSILAC                    | 18668040                                                       |
| hsa-let-7b-5p | MIMAT0000063 | ZNF805       | 390980 | CLASH                                 | 23622248                                                       |
| hsa-let-7b-5p | MIMAT0000063 | RAB19        | 401409 | HITS-CLIP//PAR-CLIP                   | 23706177 23313552 27292025                                     |
| hsa-let-7b-5p | MIMAT0000063 | POTEG        | 404785 | CLASH//PAR-CLIP                       | 23622248 26701625 27292025                                     |
| hsa-let-7b-5p | MIMAT0000063 | NOMO3        | 408050 | CLASH                                 | 23622248                                                       |
| hsa-let-7b-5p | MIMAT0000063 | FNDC9        | 408263 | PAR-CLIP                              | 26701625                                                       |
| hsa-let-7b-5p | MIMAT0000063 | ATXN7L3B     | 552889 | PAR-CLIP                              | 23592263 20371350                                              |
| hsa-let-7b-5p | MIMAT0000063 | PRR5-ARHGAP8 | 553158 | PAR-CLIP                              | 27292025                                                       |
| hsa-let-7b-5p | MIMAT0000063 | POTEM        | 641455 | PAR-CLIP                              | 26701625 27292025                                              |
| hsa-let-7b-5p | MIMAT0000063 | FAM83G       | 644815 | PAR-CLIP                              | 23592263 24398324                                              |
| hsa-let-7b-5p | MIMAT0000063 | ANXA8        | 653145 | Proteomics                            | 18668040                                                       |

|               |              |         |           |                                                                        |                   |
|---------------|--------------|---------|-----------|------------------------------------------------------------------------|-------------------|
| hsa-let-7b-5p | MIMAT0000063 | ANXA8L1 | 728113    | Proteomics                                                             | 18668040          |
| hsa-let-7b-5p | MIMAT0000063 | CASTOR2 | 729438    | PAR-CLIP                                                               | 26701625          |
| hsa-let-7b-5p | MIMAT0000063 | POM121C | 100101267 | Proteomics                                                             | 18668040          |
| hsa-let-7b-5p | MIMAT0000063 | TIMM23  | 100287932 | Proteomics                                                             | 18668040          |
| hsa-let-7b-5p | MIMAT0000063 | OCLN    | 100506658 | CLASH                                                                  | 23622248          |
| hsa-mir-22-3p | MIMAT0000077 | ACLY    | 47        | Luciferase reporter assay//qRT-PCR//Western blot                       | 27317765          |
| hsa-mir-22-3p | MIMAT0000077 | AKT1    | 207       | Luciferase reporter assay//Western blot                                | 26364720          |
| hsa-mir-22-3p | MIMAT0000077 | BDNF    | 627       | Luciferase reporter assay//Microarray                                  | 21168126          |
| hsa-mir-22-3p | MIMAT0000077 | BMP6    | 654       | Luciferase reporter assay                                              | 24163368          |
| hsa-mir-22-3p | MIMAT0000077 | BMP7    | 655       | Luciferase reporter assay//qRT-PCR//Western blot                       | 19011694 24163368 |
| hsa-mir-22-3p | MIMAT0000077 | BMPR1B  | 658       | Luciferase reporter assay                                              | 24163368          |
| hsa-mir-22-3p | MIMAT0000077 | BSG     | 682       | Immunohistochemistry//Luciferase reporter assay//qRT-PCR//Western blot | 24906624 28184176 |
| hsa-mir-22-3p | MIMAT0000077 | BTF3    | 689       | Sequencing                                                             | 20371350          |
| hsa-mir-22-3p | MIMAT0000077 | BTG1    | 694       | Luciferase reporter assay                                              | 25449431          |
| hsa-mir-22-3p | MIMAT0000077 | BUB1B   | 701       | CLASH                                                                  | 23622248          |
| hsa-mir-22-3p | MIMAT0000077 | CCNA2   | 890       | Luciferase reporter assay                                              | 25596928          |
| hsa-mir-22-3p | MIMAT0000077 | CCNT2   | 905       | PAR-CLIP//Sequencing                                                   | 20371350 24398324 |
| hsa-mir-22-3p | MIMAT0000077 | CD151   | 977       | Luciferase reporter assay//qRT-PCR//Western blot                       | 24495805          |
| hsa-mir-22-3p | MIMAT0000077 | CDK6    | 1021      | Sequencing                                                             | 20371350          |
| hsa-mir-22-3p | MIMAT0000077 | CDKN1A  | 1026      | Luciferase reporter assay//PAR-CLIP//qRT-PCR//Western blot             | 23582783 21572407 |
| hsa-mir-22-3p | MIMAT0000077 | CSF1R   | 1436      | Luciferase reporter assay//qRT-PCR                                     | 24198819          |
| hsa-mir-22-3p | MIMAT0000077 | CSNK2A1 | 1457      | Sequencing                                                             | 20371350          |
| hsa-mir-22-3p | MIMAT0000077 | DAD1    | 1603      | PAR-CLIP                                                               | 27292025          |
| hsa-mir-22-3p | MIMAT0000077 | DDX6    | 1656      | PAR-CLIP                                                               | 22012620          |

|               |              |        |      |                                                                                                                                                                                                                                                 |                   |
|---------------|--------------|--------|------|-------------------------------------------------------------------------------------------------------------------------------------------------------------------------------------------------------------------------------------------------|-------------------|
| hsa-mir-22-3p | MIMAT0000077 | E2F2   | 1870 | PAR-CLIP//Sequencing                                                                                                                                                                                                                            | 20371350 26701625 |
| hsa-mir-22-3p | MIMAT0000077 | ERBB2  | 2064 | Luciferase reporter assay                                                                                                                                                                                                                       | 26544868          |
| hsa-mir-22-3p | MIMAT0000077 | ERBB3  | 2065 | Luciferase reporter assay//qRT-PCR//Western blot                                                                                                                                                                                                | 22484852          |
| hsa-mir-22-3p | MIMAT0000077 | ESR1   | 2099 | Immunoblot//Luciferase reporter assay//qRT-PCR//Western blot                                                                                                                                                                                    | 18347104 19414598 |
| hsa-mir-22-3p | MIMAT0000077 | MECOM  | 2122 | 5RACE//ChIP//Co-immunoprecipitation//Luciferase reporter assay//Northern blot//Western blot                                                                                                                                                     | 27617961          |
| hsa-mir-22-3p | MIMAT0000077 | FKBP5  | 2289 | CLASH                                                                                                                                                                                                                                           | 23622248          |
| hsa-mir-22-3p | MIMAT0000077 | GRB2   | 2885 | PAR-CLIP                                                                                                                                                                                                                                        | 26701625          |
| hsa-mir-22-3p | MIMAT0000077 | NR3C1  | 2908 | Sequencing                                                                                                                                                                                                                                      | 20371350          |
| hsa-mir-22-3p | MIMAT0000077 | H3F3B  | 3021 | PAR-CLIP//Sequencing                                                                                                                                                                                                                            | 20371350          |
| hsa-mir-22-3p | MIMAT0000077 | HIF1A  | 3091 | Immunofluorescence//qRT-PCR//Western blot                                                                                                                                                                                                       | 24496460          |
| hsa-mir-22-3p | MIMAT0000077 | HMGB1  | 3146 | Luciferase reporter assay//qRT-PCR//Western blot                                                                                                                                                                                                | 23303785          |
| hsa-mir-22-3p | MIMAT0000077 | HSPA1B | 3304 | CLASH                                                                                                                                                                                                                                           | 23622248          |
| hsa-mir-22-3p | MIMAT0000077 | HTR2C  | 3358 | Luciferase reporter assay//Microarray                                                                                                                                                                                                           | 21168126          |
| hsa-mir-22-3p | MIMAT0000077 | CYR61  | 3491 | Luciferase reporter assay//qRT-PCR//Western blot                                                                                                                                                                                                | 24449575          |
| hsa-mir-22-3p | MIMAT0000077 | CXCR2  | 3579 | Flow//Gluc reporter assay//GUS reporter assay//HITS-CLIP//Immunoblot//Immunocytochemistry//Immunofluorescence//Immunohistochemistry//Immunoprecipitation//Luciferase reporter assay//qRT-PCR//RNA immunoprecipitation assay (RIP)//Western blot | 26364720          |

|               |              |         |      |                                                                             |                   |
|---------------|--------------|---------|------|-----------------------------------------------------------------------------|-------------------|
| hsa-mir-22-3p | MIMAT0000077 | INSIG1  | 3638 | HITS-CLIP                                                                   | 19536157          |
| hsa-mir-22-3p | MIMAT0000077 | IRF5    | 3663 | Luciferase reporter assay//qRT-PCR//Western blot                            | 23303785          |
| hsa-mir-22-3p | MIMAT0000077 | RPSA    | 3921 | CLASH                                                                       | 23622248          |
| hsa-mir-22-3p | MIMAT0000077 | LBP     | 3929 | CLASH                                                                       | 23622248          |
| hsa-mir-22-3p | MIMAT0000077 | LGALS1  | 3956 | Immunofluorescence//qRT-PCR//Western blot                                   | 24496460          |
| hsa-mir-22-3p | MIMAT0000077 | LGALS9  | 3965 | Flow//Luciferase reporter assay//qRT-PCR//Western blot                      | 26239725          |
| hsa-mir-22-3p | MIMAT0000077 | MAOA    | 4128 | Luciferase reporter assay//Microarray                                       | 21168126          |
| hsa-mir-22-3p | MIMAT0000077 | MAX     | 4149 | PAR-CLIP                                                                    | 23592263          |
| hsa-mir-22-3p | MIMAT0000077 | MMP14   | 4323 | Luciferase reporter assay//Microarray//qRT-PCR//Western blot                | 26610210          |
| hsa-mir-22-3p | MIMAT0000077 | MTHFR   | 4524 | Immunoblot//Luciferase reporter assay//qRT-PCR//Western blot                | 28045918          |
| hsa-mir-22-3p | MIMAT0000077 | MYO6    | 4646 | CLASH                                                                       | 23622248          |
| hsa-mir-22-3p | MIMAT0000077 | NTRK2   | 4915 | Luciferase reporter assay//qRT-PCR//Western blot                            | 27662840          |
| hsa-mir-22-3p | MIMAT0000077 | PDHA1   | 5160 | Sequencing                                                                  | 20371350          |
| hsa-mir-22-3p | MIMAT0000077 | PIK3C2A | 5286 | Sequencing                                                                  | 20371350          |
| hsa-mir-22-3p | MIMAT0000077 | PLK1    | 5347 | Microarray//qRT-PCR//Western blot                                           | 25970317          |
| hsa-mir-22-3p | MIMAT0000077 | PPARA   | 5465 | Luciferase reporter assay//qRT-PCR//Western blot                            | 18347104 19011694 |
| hsa-mir-22-3p | MIMAT0000077 | PRKACA  | 5566 | Sequencing                                                                  | 20371350          |
| hsa-mir-22-3p | MIMAT0000077 | PTEN    | 5728 | Luciferase reporter assay                                                   | 20388916 26544868 |
| hsa-mir-22-3p | MIMAT0000077 | PTMS    | 5763 | Luciferase reporter assay//Microarray//Northern blot//qRT-PCR//Western blot | 22493679          |
| hsa-mir-22-3p | MIMAT0000077 | PEX5    | 5830 | CLASH                                                                       | 23622248          |

|               |              |        |      |                                                                                                                                                                                                |                            |
|---------------|--------------|--------|------|------------------------------------------------------------------------------------------------------------------------------------------------------------------------------------------------|----------------------------|
| hsa-mir-22-3p | MIMAT0000077 | RAB5B  | 5869 | Chromatin immunoprecipitation//FACS//Immunohistochemistry//Luciferase reporter assay//Microarray//Next Generation Sequencing (NGS)//Northern blot//PAR-CLIP//qRT-PCR//Sequencing//Western blot | 20371350 21572407 27569217 |
| hsa-mir-22-3p | MIMAT0000077 | RAP2B  | 5912 | HITS-CLIP                                                                                                                                                                                      | 23313552                   |
| hsa-mir-22-3p | MIMAT0000077 | RBL1   | 5933 | PAR-CLIP                                                                                                                                                                                       | 20371350                   |
| hsa-mir-22-3p | MIMAT0000077 | RGS2   | 5997 | Luciferase reporter assay//Microarray                                                                                                                                                          | 21168126 23349832          |
| hsa-mir-22-3p | MIMAT0000077 | RPL24  | 6152 | CLASH                                                                                                                                                                                          | 23622248                   |
| hsa-mir-22-3p | MIMAT0000077 | RPL35A | 6165 | CLASH                                                                                                                                                                                          | 23622248                   |
| hsa-mir-22-3p | MIMAT0000077 | RPS2   | 6187 | CLASH                                                                                                                                                                                          | 23622248                   |
| hsa-mir-22-3p | MIMAT0000077 | RPS4X  | 6191 | CLASH                                                                                                                                                                                          | 23622248                   |
| hsa-mir-22-3p | MIMAT0000077 | SCD    | 6319 | HITS-CLIP                                                                                                                                                                                      | 23313552                   |
| hsa-mir-22-3p | MIMAT0000077 | SRSF7  | 6432 | Sequencing                                                                                                                                                                                     | 20371350                   |
| hsa-mir-22-3p | MIMAT0000077 | SLC2A1 | 6513 | HITS-CLIP//In situ hybridization//Luciferase reporter assay//qRT-PCR//Western blot                                                                                                             | 23313552 25304371          |
| hsa-mir-22-3p | MIMAT0000077 | SNAI1  | 6615 | Luciferase reporter assay//Microarray//qRT-PCR//Western blot                                                                                                                                   | 26610210                   |
| hsa-mir-22-3p | MIMAT0000077 | SP1    | 6667 | Luciferase reporter assay//qRT-PCR//Reporter assay//Western blot                                                                                                                               | 23529765 21502362 27904693 |
| hsa-mir-22-3p | MIMAT0000077 | SRPK1  | 6732 | PAR-CLIP                                                                                                                                                                                       | 20371350                   |
| hsa-mir-22-3p | MIMAT0000077 | STX4   | 6810 | CLASH                                                                                                                                                                                          | 23622248                   |



|               |              |           |      |                                                                                                                                                                          |                                     |
|---------------|--------------|-----------|------|--------------------------------------------------------------------------------------------------------------------------------------------------------------------------|-------------------------------------|
| hsa-mir-22-3p | MIMAT0000077 | TACC1     | 6867 | Chromatin immunoprecipitation//FACS//Immunohistochemistry//Luciferase reporter assay//Microarray//Next Generation Sequencing (NGS)//Northern blot//qRT-PCR//Western blot | 27569217                            |
| hsa-mir-22-3p | MIMAT0000077 | TBX3      | 6926 | Sequencing                                                                                                                                                               | 20371350                            |
| hsa-mir-22-3p | MIMAT0000077 | TCF7      | 6932 | //Luciferase reporter assay//qRT-PCR//Western blot                                                                                                                       | 26193896                            |
| hsa-mir-22-3p | MIMAT0000077 | TFRC      | 7037 | flow//Luciferase reporter assay//Northern blot                                                                                                                           | 19135902                            |
| hsa-mir-22-3p | MIMAT0000077 | TIAM1     | 7074 | Luciferase reporter assay//Western blot                                                                                                                                  | 23440286                            |
| hsa-mir-22-3p | MIMAT0000077 | TPD52L2   | 7165 | PAR-CLIP                                                                                                                                                                 | 23592263                            |
| hsa-mir-22-3p | MIMAT0000077 | VSNL1     | 7447 | HITS-CLIP//PAR-CLIP                                                                                                                                                      | 21572407 20371350 23824327 27418678 |
| hsa-mir-22-3p | MIMAT0000077 | WNT1      | 7471 | Immunohistochemistry//Luciferase reporter assay//Microarray//qRT-PCR//Western blot                                                                                       | 23851184                            |
| hsa-mir-22-3p | MIMAT0000077 | YWHAZ     | 7534 | PAR-CLIP                                                                                                                                                                 | 24398324 23446348 20371350          |
| hsa-mir-22-3p | MIMAT0000077 | ZNF217    | 7764 | Sequencing                                                                                                                                                               | 20371350                            |
| hsa-mir-22-3p | MIMAT0000077 | ALMS1     | 7840 | CLASH                                                                                                                                                                    | 23622248                            |
| hsa-mir-22-3p | MIMAT0000077 | NUP214    | 8021 | CLASH                                                                                                                                                                    | 23622248                            |
| hsa-mir-22-3p | MIMAT0000077 | SLC7A5    | 8140 | PAR-CLIP                                                                                                                                                                 | 26701625                            |
| hsa-mir-22-3p | MIMAT0000077 | NCOA1     | 8648 | Luciferase reporter assay//qRT-PCR//Western blot                                                                                                                         | 21798241 26244872                   |
| hsa-mir-22-3p | MIMAT0000077 | TNFRSF10D | 8793 | PAR-CLIP                                                                                                                                                                 | 22012620                            |
| hsa-mir-22-3p | MIMAT0000077 | FUBP1     | 8880 | CLASH                                                                                                                                                                    | 23622248                            |
| hsa-mir-22-3p | MIMAT0000077 | MTA1      | 9112 | Immunofluorescence//Immunohistochemistry//Luciferase reporter assay//qRT-PCR                                                                                             | 28231399                            |
| hsa-mir-22-3p | MIMAT0000077 | VAPB      | 9217 | CLASH                                                                                                                                                                    | 23622248                            |

|               |              |          |       |                                                                                          |                   |
|---------------|--------------|----------|-------|------------------------------------------------------------------------------------------|-------------------|
| hsa-mir-22-3p | MIMAT0000077 | TCEAL1   | 9338  | Immunoblot//Luciferase reporter assay//qRT-PCR                                           | 21565979          |
| hsa-mir-22-3p | MIMAT0000077 | RBM39    | 9584  | CLASH                                                                                    | 23622248          |
| hsa-mir-22-3p | MIMAT0000077 | ZNF646   | 9726  | PAR-CLIP                                                                                 | 22100165 22291592 |
| hsa-mir-22-3p | MIMAT0000077 | IFT140   | 9742  | PAR-CLIP                                                                                 | 20371350          |
| hsa-mir-22-3p | MIMAT0000077 | HDAC4    | 9759  | Luciferase reporter assay//qRT-PCR//Western blot                                         | 20842113 23349832 |
| hsa-mir-22-3p | MIMAT0000077 | HDAC6    | 10013 | Luciferase reporter assay//qRT-PCR//Western blot                                         | 22375943 28195408 |
| hsa-mir-22-3p | MIMAT0000077 | ARPC5    | 10092 | EMSA//Immunohistochemistry//Luciferase reporter assay//Microarray//qRT-PCR//Western blot | 22447776          |
| hsa-mir-22-3p | MIMAT0000077 | NET1     | 10276 | Luciferase reporter assay//qRT-PCR//Western blot                                         | 25041463          |
| hsa-mir-22-3p | MIMAT0000077 | BTN3A3   | 10384 | PAR-CLIP                                                                                 | 20371350          |
| hsa-mir-22-3p | MIMAT0000077 | ZNF460   | 10794 | PAR-CLIP                                                                                 | 23592263          |
| hsa-mir-22-3p | MIMAT0000077 | EFR3B    | 22979 | HITS-CLIP                                                                                | 19536157          |
| hsa-mir-22-3p | MIMAT0000077 | RCOR1    | 23186 | Luciferase reporter assay                                                                | 23349832          |
| hsa-mir-22-3p | MIMAT0000077 | TBC1D12  | 23232 | Sequencing                                                                               | 20371350          |
| hsa-mir-22-3p | MIMAT0000077 | WWC1     | 23286 | PAR-CLIP                                                                                 | 22012620          |
| hsa-mir-22-3p | MIMAT0000077 | FRAT2    | 23401 | PAR-CLIP//Sequencing                                                                     | 20371350 21572407 |
| hsa-mir-22-3p | MIMAT0000077 | SIRT1    | 23411 | Luciferase reporter assay//qRT-PCR//Western blot                                         | 26912776 26662303 |
| hsa-mir-22-3p | MIMAT0000077 | TTC33    | 23548 | HITS-CLIP                                                                                | 19536157          |
| hsa-mir-22-3p | MIMAT0000077 | ELP5     | 23587 | CLASH                                                                                    | 23622248          |
| hsa-mir-22-3p | MIMAT0000077 | LEMD3    | 23592 | Sequencing                                                                               | 20371350          |
| hsa-mir-22-3p | MIMAT0000077 | ARHGEF26 | 26084 | PAR-CLIP                                                                                 | 27292025          |
| hsa-mir-22-3p | MIMAT0000077 | SERBP1   | 26135 | PAR-CLIP                                                                                 | 23446348          |
| hsa-mir-22-3p | MIMAT0000077 | TRAF3IP1 | 26146 | HITS-CLIP                                                                                | 19536157          |
| hsa-mir-22-3p | MIMAT0000077 | MYCBP    | 26292 | Immunoblot//Luciferase reporter assay//qRT-PCR                                           | 20562918          |
| hsa-mir-22-3p | MIMAT0000077 | FOXP1    | 27086 | Sequencing                                                                               | 20371350          |
| hsa-mir-22-3p | MIMAT0000077 | PIGP     | 51227 | HITS-CLIP                                                                                | 23824327          |

|               |              |          |        |                                                                                                                         |                            |
|---------------|--------------|----------|--------|-------------------------------------------------------------------------------------------------------------------------|----------------------------|
| hsa-mir-22-3p | MIMAT0000077 | UBR5     | 51366  | qRT-PCR//Western blot                                                                                                   | 27124677                   |
| hsa-mir-22-3p | MIMAT0000077 | GINS2    | 51659  | HITS-CLIP                                                                                                               | 23824327                   |
| hsa-mir-22-3p | MIMAT0000077 | CYCS     | 54205  | HITS-CLIP                                                                                                               | 23824327                   |
| hsa-mir-22-3p | MIMAT0000077 | DDIT4    | 54541  | PAR-CLIP                                                                                                                | 23592263 21572407          |
| hsa-mir-22-3p | MIMAT0000077 | TET2     | 54790  | Flow//Immunofluorescence//Immunohistochemistry//In situ hybridization//Luciferase reporter assay//qRT-PCR//Western blot | 23830207 23827711          |
| hsa-mir-22-3p | MIMAT0000077 | DCAF16   | 54876  | HITS-CLIP                                                                                                               | 23313552                   |
| hsa-mir-22-3p | MIMAT0000077 | LRRC20   | 55222  | HITS-CLIP                                                                                                               | 19536157                   |
| hsa-mir-22-3p | MIMAT0000077 | LRRC1    | 55227  | Sequencing                                                                                                              | 20371350                   |
| hsa-mir-22-3p | MIMAT0000077 | MIS18BP1 | 55320  | Sequencing                                                                                                              | 20371350                   |
| hsa-mir-22-3p | MIMAT0000077 | LIN7C    | 55327  | Sequencing                                                                                                              | 20371350                   |
| hsa-mir-22-3p | MIMAT0000077 | CAMK2N1  | 55450  | HITS-CLIP                                                                                                               | 23313552                   |
| hsa-mir-22-3p | MIMAT0000077 | RCC2     | 55920  | HITS-CLIP                                                                                                               | 23313552                   |
| hsa-mir-22-3p | MIMAT0000077 | ZMAT5    | 55954  | PAR-CLIP                                                                                                                | 23592263                   |
| hsa-mir-22-3p | MIMAT0000077 | RBSN     | 64145  | Sequencing                                                                                                              | 20371350                   |
| hsa-mir-22-3p | MIMAT0000077 | RMND5A   | 64795  | PAR-CLIP                                                                                                                | 24398324                   |
| hsa-mir-22-3p | MIMAT0000077 | PHACTR4  | 65979  | PAR-CLIP                                                                                                                | 26701625                   |
| hsa-mir-22-3p | MIMAT0000077 | EDC3     | 80153  | Sequencing                                                                                                              | 20371350                   |
| hsa-mir-22-3p | MIMAT0000077 | CTC1     | 80169  | PAR-CLIP                                                                                                                | 23446348 20371350          |
| hsa-mir-22-3p | MIMAT0000077 | CHD9     | 80205  | HITS-CLIP                                                                                                               | 23313552                   |
| hsa-mir-22-3p | MIMAT0000077 | SPG11    | 80208  | CLASH                                                                                                                   | 23622248                   |
| hsa-mir-22-3p | MIMAT0000077 | CLPTM1L  | 81037  | CLASH                                                                                                                   | 23622248                   |
| hsa-mir-22-3p | MIMAT0000077 | TSC22D4  | 81628  | Sequencing                                                                                                              | 20371350                   |
| hsa-mir-22-3p | MIMAT0000077 | LONP2    | 83752  | HITS-CLIP                                                                                                               | 23824327 27418678          |
| hsa-mir-22-3p | MIMAT0000077 | KCTD10   | 83892  | PAR-CLIP                                                                                                                | 23592263 24398324 26701625 |
| hsa-mir-22-3p | MIMAT0000077 | ARID5B   | 84159  | Sequencing                                                                                                              | 20371350                   |
| hsa-mir-22-3p | MIMAT0000077 | GLIS2    | 84662  | CLASH                                                                                                                   | 23622248                   |
| hsa-mir-22-3p | MIMAT0000077 | MTDH     | 92140  | Luciferase reporter assay//qRT-PCR//Western blot                                                                        | 25323629                   |
| hsa-mir-22-3p | MIMAT0000077 | SFXN1    | 94081  | CLASH                                                                                                                   | 23622248                   |
| hsa-mir-22-3p | MIMAT0000077 | VASN     | 114990 | HITS-CLIP                                                                                                               | 19536157                   |
| hsa-mir-22-3p | MIMAT0000077 | KCTD12   | 115207 | CLASH                                                                                                                   | 23622248                   |
| hsa-mir-22-3p | MIMAT0000077 | C15orf40 | 123207 | PAR-CLIP                                                                                                                | 23446348 27292025          |

|               |              |          |           |                                                                                                                                                                                                                                                 |                                              |
|---------------|--------------|----------|-----------|-------------------------------------------------------------------------------------------------------------------------------------------------------------------------------------------------------------------------------------------------|----------------------------------------------|
| hsa-mir-22-3p | MIMAT0000077 | C1orf87  | 127795    | HITS-CLIP                                                                                                                                                                                                                                       | 23824327                                     |
| hsa-mir-22-3p | MIMAT0000077 | ACVR1C   | 130399    | Luciferase reporter assay//Reporter assay//Western blot                                                                                                                                                                                         | 21224400                                     |
| hsa-mir-22-3p | MIMAT0000077 | C5orf24  | 134553    | PAR-CLIP//Sequencing                                                                                                                                                                                                                            | 20371350 23592263 24398324 23446348 21572407 |
| hsa-mir-22-3p | MIMAT0000077 | SOGA1    | 140710    | Sequencing                                                                                                                                                                                                                                      | 20371350                                     |
| hsa-mir-22-3p | MIMAT0000077 | DNHD1    | 144132    | CLASH                                                                                                                                                                                                                                           | 23622248                                     |
| hsa-mir-22-3p | MIMAT0000077 | TMEM120B | 144404    | HITS-CLIP                                                                                                                                                                                                                                       | 23706177                                     |
| hsa-mir-22-3p | MIMAT0000077 | PDIK1L   | 149420    | PAR-CLIP                                                                                                                                                                                                                                        | 21572407                                     |
| hsa-mir-22-3p | MIMAT0000077 | PPM1K    | 152926    | Luciferase reporter assay//qRT-PCR//Western blot                                                                                                                                                                                                | 26592513                                     |
| hsa-mir-22-3p | MIMAT0000077 | PRELID2  | 153768    | PAR-CLIP                                                                                                                                                                                                                                        | 22291592                                     |
| hsa-mir-22-3p | MIMAT0000077 | ZNF431   | 170959    | PAR-CLIP                                                                                                                                                                                                                                        | 27292025                                     |
| hsa-mir-22-3p | MIMAT0000077 | TMEM201  | 199953    | PAR-CLIP                                                                                                                                                                                                                                        | 26701625                                     |
| hsa-mir-22-3p | MIMAT0000077 | IBA57    | 200205    | PAR-CLIP                                                                                                                                                                                                                                        | 26701625                                     |
| hsa-mir-22-3p | MIMAT0000077 | HNRNPA3  | 220988    | HITS-CLIP                                                                                                                                                                                                                                       | 19536157                                     |
| hsa-mir-22-3p | MIMAT0000077 | FOXK1    | 221937    | PAR-CLIP                                                                                                                                                                                                                                        | 26701625                                     |
| hsa-mir-22-3p | MIMAT0000077 | TMED4    | 222068    | PAR-CLIP                                                                                                                                                                                                                                        | 24398324 21572407 20371350                   |
| hsa-mir-22-3p | MIMAT0000077 | BRWD3    | 254065    | PAR-CLIP                                                                                                                                                                                                                                        | 23592263                                     |
| hsa-mir-22-3p | MIMAT0000077 | MALAT1   | 378938    | Flow//Gluc reporter assay//GUS reporter assay//HITS-CLIP//Immunoblot//Immunocytochemistry//Immunofluorescence//Immunohistochemistry//Immunoprecipitation//Luciferase reporter assay//qRT-PCR//RNA immunoprecipitation assay (RIP)//Western blot | 26364720                                     |
| hsa-mir-22-3p | MIMAT0000077 | ZNF662   | 389114    | PAR-CLIP                                                                                                                                                                                                                                        | 20371350 27292025                            |
| hsa-mir-22-3p | MIMAT0000077 | RAB44    | 401258    | PAR-CLIP                                                                                                                                                                                                                                        | 22012620                                     |
| hsa-mir-22-3p | MIMAT0000077 | TMEM178B | 100507421 | HITS-CLIP                                                                                                                                                                                                                                       | 23824327 27418678                            |
| hsa-mir-184   | MIMAT0000454 | AKT1     | 207       | Luciferase reporter assay                                                                                                                                                                                                                       | 27666871                                     |

|             |              |             |      |                                                                            |                                     |
|-------------|--------------|-------------|------|----------------------------------------------------------------------------|-------------------------------------|
| hsa-mir-184 | MIMAT0000454 | AKT2        | 208  | Luciferase reporter assay//PAR-CLIP//qRT-PCR//Western blot                 | 20409325 20371350 27418134          |
| hsa-mir-184 | MIMAT0000454 | ARHGDI<br>A | 396  | PAR-CLIP                                                                   | 26701625                            |
| hsa-mir-184 | MIMAT0000454 | BCL2        | 596  | Luciferase reporter assay                                                  | 24157866                            |
| hsa-mir-184 | MIMAT0000454 | BCL2L1      | 598  | PAR-CLIP                                                                   | 26701625                            |
| hsa-mir-184 | MIMAT0000454 | TPP1        | 1200 | PAR-CLIP                                                                   | 27292025                            |
| hsa-mir-184 | MIMAT0000454 | CSF1        | 1435 | PAR-CLIP                                                                   | 20371350                            |
| hsa-mir-184 | MIMAT0000454 | GAS1        | 2619 | qRT-PCR//Western blot                                                      | 26805687                            |
| hsa-mir-184 | MIMAT0000454 | INPPL1      | 3636 | Luciferase reporter<br>assay//Northern blot//Western<br>blot               | 19033458 24183204                   |
| hsa-mir-184 | MIMAT0000454 | LIFR        | 3977 | HITS-CLIP                                                                  | 23313552                            |
| hsa-mir-184 | MIMAT0000454 | MEIS3P1     | 4213 | PAR-CLIP                                                                   | 20371350                            |
| hsa-mir-184 | MIMAT0000454 | MYC         | 4609 | Luciferase reporter assay                                                  | 24157866                            |
| hsa-mir-184 | MIMAT0000454 | NFATC2      | 4773 | Luciferase reporter assay//qRT-PCR//Western blot                           | 19286996                            |
| hsa-mir-184 | MIMAT0000454 | NFIC        | 4782 | PAR-CLIP                                                                   | 23592263 20371350 26701625 27292025 |
| hsa-mir-184 | MIMAT0000454 | OPRD1       | 4985 | PAR-CLIP                                                                   | 20371350                            |
| hsa-mir-184 | MIMAT0000454 | PDGFB       | 5155 | Immunoblot//Luciferase<br>reporter assay//qRT-PCR                          | 27825105                            |
| hsa-mir-184 | MIMAT0000454 | PKM         | 5315 | Immunocytochemistry//Lucifera<br>se reporter assay//qRT-PCR//Western blot  | 27431728                            |
| hsa-mir-184 | MIMAT0000454 | PLAGL2      | 5326 | PAR-CLIP                                                                   | 26701625                            |
| hsa-mir-184 | MIMAT0000454 | PTPA        | 5524 | PAR-CLIP                                                                   | 26701625                            |
| hsa-mir-184 | MIMAT0000454 | PRKCB       | 5579 | Luciferase reporter assay                                                  | 27666871                            |
| hsa-mir-184 | MIMAT0000454 | FSCN1       | 6624 | PAR-CLIP                                                                   | 26701625                            |
| hsa-mir-184 | MIMAT0000454 | SURF6       | 6838 | PAR-CLIP                                                                   | 26701625                            |
| hsa-mir-184 | MIMAT0000454 | TNFAIP2     | 7127 | Immunohistochemistry//Lucifer<br>ase reporter assay//qRT-PCR//Western blot | 25888093                            |
| hsa-mir-184 | MIMAT0000454 | EZR         | 7430 | Luciferase reporter assay//qRT-PCR//Western blot                           | 25251993                            |

|             |              |           |        |                                                                                            |                                                                |
|-------------|--------------|-----------|--------|--------------------------------------------------------------------------------------------|----------------------------------------------------------------|
| hsa-mir-184 | MIMAT0000454 | CNBP      | 7555   | PAR-CLIP                                                                                   | 23592263 20371350                                              |
| hsa-mir-184 | MIMAT0000454 | SLC7A5    | 8140   | PAR-CLIP                                                                                   | 23592263 24398324 22012620 26701625                            |
| hsa-mir-184 | MIMAT0000454 | PLPP3     | 8613   | Immunoblot//Luciferase reporter assay//qRT-PCR                                             | 27825105                                                       |
| hsa-mir-184 | MIMAT0000454 | TM9SF4    | 9777   | PAR-CLIP                                                                                   | 26701625                                                       |
| hsa-mir-184 | MIMAT0000454 | CARM1     | 10498  | PAR-CLIP                                                                                   | 26701625 27292025                                              |
| hsa-mir-184 | MIMAT0000454 | RAI1      | 10743  | PAR-CLIP                                                                                   | 23592263 20371350                                              |
| hsa-mir-184 | MIMAT0000454 | PPP1R13L  | 10848  | Luciferase reporter assay                                                                  | 28012196                                                       |
| hsa-mir-184 | MIMAT0000454 | PPP6R1    | 22870  | PAR-CLIP                                                                                   | 26701625                                                       |
| hsa-mir-184 | MIMAT0000454 | ZFPM2     | 23414  | Immunoblot//Luciferase reporter assay//qRT-PCR                                             | 27825105                                                       |
| hsa-mir-184 | MIMAT0000454 | SND1      | 27044  | Immunofluorescence//Immunohistochemistry//Luciferase reporter assay//qRT-PCR//Western blot | 25216670                                                       |
| hsa-mir-184 | MIMAT0000454 | TJP3      | 27134  | PAR-CLIP                                                                                   | 23592263 20371350                                              |
| hsa-mir-184 | MIMAT0000454 | AGO2      | 27161  | Luciferase reporter assay//PAR-CLIP//Western blot                                          | 24361012 23696368 26701625                                     |
| hsa-mir-184 | MIMAT0000454 | DESI1     | 27351  | PAR-CLIP                                                                                   | 22291592                                                       |
| hsa-mir-184 | MIMAT0000454 | TNPO2     | 30000  | PAR-CLIP                                                                                   | 23592263 24398324 22012620 21572407 20371350 26701625 27292025 |
| hsa-mir-184 | MIMAT0000454 | TACO1     | 51204  | HITS-CLIP                                                                                  | 23313552                                                       |
| hsa-mir-184 | MIMAT0000454 | GNL3L     | 54552  | HITS-CLIP                                                                                  | 19536157                                                       |
| hsa-mir-184 | MIMAT0000454 | SELENOS   | 55829  | HITS-CLIP//PAR-CLIP                                                                        | 22012620 20371350 23313552                                     |
| hsa-mir-184 | MIMAT0000454 | BIN3      | 55909  | Luciferase reporter assay                                                                  | 27666871                                                       |
| hsa-mir-184 | MIMAT0000454 | LRRC8A    | 56262  | PAR-CLIP                                                                                   | 20371350                                                       |
| hsa-mir-184 | MIMAT0000454 | CBX8      | 57332  | PAR-CLIP                                                                                   | 26701625                                                       |
| hsa-mir-184 | MIMAT0000454 | FN3K      | 64122  | PAR-CLIP                                                                                   | 23592263                                                       |
| hsa-mir-184 | MIMAT0000454 | KLC2      | 64837  | PAR-CLIP                                                                                   | 26701625                                                       |
| hsa-mir-184 | MIMAT0000454 | SOX7      | 83595  | Flow//Luciferase reporter assay//qRT-PCR//Western blot                                     | 24558429                                                       |
| hsa-mir-184 | MIMAT0000454 | GPRIN1    | 114787 | PAR-CLIP                                                                                   | 23592263                                                       |
| hsa-mir-184 | MIMAT0000454 | TNFRSF13C | 115650 | HITS-CLIP                                                                                  | 23313552                                                       |
| hsa-mir-184 | MIMAT0000454 | USH1G     | 124590 | PAR-CLIP                                                                                   | 24398324 20371350                                              |

|             |              |             |               |          |          |
|-------------|--------------|-------------|---------------|----------|----------|
| hsa-mir-184 | MIMAT0000454 | IFFO2       | 126917        | PAR-CLIP | 26701625 |
| hsa-mir-184 | MIMAT0000454 | ZSCAN25     | 221785        | PAR-CLIP | 26701625 |
| hsa-mir-184 | MIMAT0000454 | CEP170B     | 283638        | PAR-CLIP | 26701625 |
| hsa-mir-184 | MIMAT0000454 | PEAK3       | 374872        | PAR-CLIP | 27292025 |
| hsa-mir-184 | MIMAT0000454 | POM121<br>C | 100101<br>267 | PAR-CLIP | 23592263 |

**Supplemental table 3. List of miRNA protein targets from MIRNET analyses**

Experimental methods used to identify protein targets and the PMID of the related reports are indicated in the last two columns.
