# Supplementary material for: Combining plasma extracellular vesicle Let-7b-5p, miR-184 and circulating miR-22-3p levels for NSCLC diagnosis and drug resistance prediction
Source: PubMed Central journal article supplement (PMC9035169; doi:10.1038/s41598-022-10598-x), 2022-04-23
Supplement: 41598_2022_10598_MOESM7_ESM.pdf [file 41598_2022_10598_MOESM7_ESM.pdf]

| Model # | Dependent variable | Predictor     | Predictor   | Predictor     | Predicted outcome             | Predicted outcome             | Agreement                   | Model parameter |                    |                  |                    |  |
|---------|--------------------|---------------|-------------|---------------|-------------------------------|-------------------------------|-----------------------------|-----------------|--------------------|------------------|--------------------|--|
|         | outcome            | hsa.let.7b.5p | hsa.miR.184 | hsa.miR.22.3p | loocv - classification output | loocv - classification binary | Agreement: outcome vs LOOCV | intercept       | hsa.let.7b.5p_coef | hsa.miR.184_coef | hsa.miR.22.3p_coef |  |
| 1       | 0                  | 127305        | 5319        | 758           | 0.334                         | 0                             | 1                           | 0.313           | -9.98E-07          | 1.16E-05         | 1.15E-04           |  |
| 2       | 0                  | 82749         | 1911        | 546           | 0.333                         | 0                             | 1                           | 0.380           | -1.54E-06          | 1.07E-05         | 1.08E-04           |  |
| 3       | 0                  | 25157         | 4717        | 3137          | 0.805                         | 1                             | 0                           | 0.502           | -2.60E-06          | 9.04E-06         | 1.04E-04           |  |
| 4       | 0                  | 107626        | 4283        | 2114          | 0.503                         | 1                             | 0                           | 0.310           | -9.64E-07          | 1.12E-05         | 1.18E-04           |  |
| 5       | 0                  | 131115        | 2986        | 3283          | 0.656                         | 1                             | 0                           | 0.209           | -1.49E-07          | 1.17E-05         | 1.32E-04           |  |
| 6       | 0                  | 141532        | 3180        | 1419          | 0.385                         | 0                             | 1                           | 0.282           | -7.27E-07          | 1.16E-05         | 1.19E-04           |  |
| 7       | 0                  | 108456        | 3342        | 924           | 0.350                         | 0                             | 1                           | 0.338           | -1.20E-06          | 1.11E-05         | 1.13E-04           |  |
| 8       | 0                  | 129569        | 8772        | 778           | 0.380                         | 0                             | 1                           | 0.301           | -8.77E-07          | 1.19E-05         | 1.15E-04           |  |
| 9       | 0                  | 85214         | 5498        | 407           | 0.353                         | 0                             | 1                           | 0.376           | -1.50E-06          | 1.10E-05         | 1.08E-04           |  |
| 10      | 0                  | 80505         | 7630        | 874           | 0.436                         | 0                             | 1                           | 0.380           | -1.52E-06          | 1.11E-05         | 1.08E-04           |  |
| 11      | 0                  | 96798         | 3448        | 318           | 0.298                         | 0                             | 1                           | 0.359           | -1.38E-06          | 1.10E-05         | 1.10E-04           |  |
| 12      | 1                  | 43127         | 8764        | 3132          | 0.713                         | 1                             | 1                           | 0.274           | -9.77E-07          | 1.20E-05         | 1.20E-04           |  |
| 13      | 1                  | 82362         | 15669       | 2239          | 0.640                         | 1                             | 1                           | 0.312           | -1.33E-06          | 1.10E-05         | 1.19E-04           |  |
| 14      | 1                  | 33742         | 9202        | 4866          | 0.946                         | 1                             | 1                           | 0.311           | -1.22E-06          | 1.17E-05         | 1.17E-04           |  |
| 15      | 1                  | 27027         | 20885       | 4365          | 1.038                         | 1                             | 1                           | 0.316           | -1.28E-06          | 1.17E-05         | 1.17E-04           |  |
| 16      | 1                  | 35250         | 24119       | 4699          | 1.112                         | 1                             | 1                           | 0.311           | -1.27E-06          | 1.19E-05         | 1.19E-04           |  |
| 17      | 1                  | 35957         | 12890       | 4614          | 0.958                         | 1                             | 1                           | 0.312           | -1.23E-06          | 1.16E-05         | 1.17E-04           |  |
| 18      | 1                  | 27112         | 23983       | 2843          | 0.879                         | 1                             | 1                           | 0.299           | -1.13E-06          | 1.13E-05         | 1.19E-04           |  |
| 19      | 1                  | 82557         | 5504        | 980           | 0.342                         | 0                             | 0                           | 0.216           | -8.74E-07          | 1.26E-05         | 1.31E-04           |  |
| 20      | 1                  | 52805         | 23762       | 3691          | 0.953                         | 1                             | 1                           | 0.315           | -1.26E-06          | 1.14E-05         | 1.17E-04           |  |
| 21      | 1                  | 47405         | 998         | 9406          | 1.628                         | 1                             | 1                           | 0.176           | -5.65E-07          | 1.07E-05         | 1.56E-04           |  |
| 22      | 1                  | 25157         | 19415       | 6642          | 1.337                         | 1                             | 1                           | 0.287           | -1.23E-06          | 1.23E-05         | 1.27E-04           |  |
| 23      | 1                  | 22758         | 15395       | 4554          | 0.999                         | 1                             | 1                           | 0.314           | -1.25E-06          | 1.16E-05         | 1.17E-04           |  |
| 24      | 1                  | 45776         | 5191        | 4232          | 0.802                         | 1                             | 1                           | 0.297           | -1.13E-06          | 1.20E-05         | 1.17E-04           |  |
| 25      | 1                  | 82298         | 4274        | 3017          | 0.600                         | 1                             | 1                           | 0.302           | -1.29E-06          | 1.21E-05         | 1.17E-04           |  |
| 26      | 1                  | 62430         | 1839        | 2647          | 0.539                         | 1                             | 1                           | 0.248           | -9.01E-07          | 1.29E-05         | 1.22E-04           |  |
| 27      | 1                  | 116371        | 4893        | 1448          | 0.354                         | 0                             | 0                           | 0.316           | -1.67E-06          | 1.19E-05         | 1.20E-04           |  |
| 28      | 1                  | 32350         | 9734        | 3374          | 0.765                         | 1                             | 1                           | 0.277           | -9.75E-07          | 1.19E-05         | 1.20E-04           |  |
| 29      | 1                  | 111065        | 4519        | 5398          | 0.828                         | 1                             | 1                           | 0.353           | -1.57E-06          | 1.15E-05         | 1.11E-04           |  |
| 30      | 1                  | 114855        | 3444        | 1934          | 0.400                         | 0                             | 0                           | 0.325           | -1.68E-06          | 1.20E-05         | 1.17E-04           |  |
| 31      | 1                  | 102374        | 6342        | 2819          | 0.569                         | 1                             | 1                           | 0.334           | -1.57E-06          | 1.16E-05         | 1.14E-04           |  |
| 32      | 1                  | 148442        | 330         | 2661          | 0.332                         | 0                             | 0                           | 0.428           | -2.54E-06          | 1.17E-05         | 1.04E-04           |  |
| 33      | 1                  | 35230         | 16260       | 4413          | 0.975                         | 1                             | 1                           | 0.313           | -1.24E-06          | 1.16E-05         | 1.17E-04           |  |
| 34      | 1                  | 80649         | 59723       | 1039          | 1.097                         | 1                             | 1                           | 0.296           | -1.13E-06          | 1.29E-05         | 1.17E-04           |  |
| 35      | 1                  | 20148         | 5302        | 3884          | 0.781                         | 1                             | 1                           | 0.270           | -9.13E-07          | 1.22E-05         | 1.19E-04           |  |
|         |                    |               |             |               |                               |                               | 80.00%                      |                 |                    |                  |                    |  |

## Result

### R-code:

```

library(boot)
library(ROCR)
library(LUR)
data <- read.delim(file.choose("211008-P71-Input-data.txt"))
#check the data
summary(data)
str(data)
typeof(data)
hist(data$hsa.let.7b.5p)
hist(data$hsa.miR.184)
hist(data$hsa.miR.22.3p)
##LOOCV using the LUR package
loocv.data <-
loocv(data,dependent="outcome",c("hsa.let.7b.5p","hsa.miR.184","hsa.miR.22.3p"),export_coefficients=TRUE)
write.table(loocv.data,"211012-P71-LOOCV-output.txt",sep=" ")

```

### Supplemental table 4. Leave-one-out cross validation analysis

The three predictors three predictor microRNAs (*let-7b-5p*, *miR-184*, *miR-22-3p*) were examined for the binary outcome cancer-free versus confirmed cases. 35 regression models were generated, and each time one sample was left out to build the model. The sample that was left out was classified using the model generated from the remaining 34 samples. We then compared in how many instances the prediction agreed with the actual outcome and observed an 80% match between the prediction and the outcome. The related R-code is shown below the table
